# Supplementary material for: Lactones from the Sponge-Derived Fungus Talaromyces rugulosus
Source: PubMed Central journal article supplement (PMC5706048; doi:10.3390/md15110359), 2017-11-14
Supplement: marinedrugs-15-00359-s001.pdf [file marinedrugs-15-00359-s001.pdf]

*Supplementary Material*

# **Lactones from the Sponge-Derived Fungus *Talaromyces rugulosus***

**Lisa Küppers**<sup>1,§</sup>, **Weaam Ebrahim**<sup>1,2,§</sup>, **Mona El-Neketi**<sup>2</sup>, **Ferhat Can Özkaya**<sup>1</sup>, **Attila Mándi**<sup>3</sup>, **Tibor Kurtán**<sup>3</sup>, **Raha S. Orfali**<sup>4</sup>, **Werner E. G. Müller**<sup>5</sup>, **Rudolf Hartmann**<sup>6</sup>, **Wenhan Lin**<sup>7</sup>, **Weiguo Song**<sup>8</sup>, **Zhen Liu**<sup>1,\*</sup>, **Peter Proksch**<sup>1,\*</sup>

<sup>1</sup> Institute of Pharmaceutical Biology and Biotechnology, Heinrich-Heine-Universität Düsseldorf, 40225 Düsseldorf, Germany; li-kue@gmx.de (L.K.); weaam.ebrahim@uni-duesseldorf.de (W.E.); fcanozkaya@gmail.com (F.C.Ö.)

<sup>2</sup> Department of Pharmacognosy, Faculty of Pharmacy, Mansoura University, Mansoura 35516, Egypt; monaneketi@yahoo.com (M.E.-N.)

<sup>3</sup> Department of Organic Chemistry, University of Debrecen, Debrecen 4032, Hungary; mandi.attila@science.unideb.hu (A.M.); kurtan.tibor@science.unideb.hu (T.K.)

<sup>4</sup> Department of Pharmacognosy, Faculty of Pharmacy, King Saud University, Riyadh, Saudi Arabia; rom2leen@gmail.com (R.S.O.)

<sup>5</sup> Institute of Physiological Chemistry, Universitätsmedizin der Johannes Gutenberg-Universität Mainz, 55128 Mainz, Germany; wmueller@uni-mainz.de (W.E.G.M.)

<sup>6</sup> Institute of Complex Systems: Strukturbiochemie, Forschungszentrum Juelich, 52428 Juelich, Germany; r.hartmann@fz-juelich.de (R.H.)

<sup>7</sup> State Key Laboratory of Natural and Biomimetic Drugs, Peking University, Beijing 100191, People's Republic of China; whlin@bjmu.edu.cn (W.L.)

<sup>8</sup> Fukang Pharma, North-East of Dongwaihuan Road, Dongcheng Industrial Area, 262700 Shouguang City, People's Republic of China; songwg@139.com (W.S.)

\* Correspondence: zhenfeizi0@sina.com (Z.L.); proksch@uni-duesseldorf (P.P.); Tel.: +49-211-81-14163

§ L. Küppers and W. Ebrahim contributed equally to this study

## Table of Contents

|                                                                                                | Page |
|------------------------------------------------------------------------------------------------|------|
| S1. HRESIMS spectrum of compound 1.                                                            | 6    |
| S2. <sup>1</sup> H NMR (300 MHz, CD <sub>3</sub> OD) spectrum of compound 1.                   | 7    |
| S3. <sup>13</sup> C NMR (75 MHz, CD <sub>3</sub> OD) spectrum of compound 1.                   | 8    |
| S4. <sup>1</sup> H- <sup>1</sup> H COSY (300 MHz, CD <sub>3</sub> OD) spectrum of compound 1.  | 9    |
| S5. HSQC (300 and 75 MHz, CD <sub>3</sub> OD) spectrum of compound 1.                          | 10   |
| S6. HMBC (300 and 75 MHz, CD <sub>3</sub> OD) spectrum of compound 1.                          | 11   |
| S7. HRESIMS spectrum of compound 2.                                                            | 12   |
| S8. <sup>1</sup> H NMR (300 MHz, CD <sub>3</sub> OD) spectrum of compound 2.                   | 13   |
| S9. <sup>13</sup> C NMR (75 MHz, CD <sub>3</sub> OD) spectrum of compound 2.                   | 14   |
| S10. <sup>1</sup> H- <sup>1</sup> H COSY (300 MHz, CD <sub>3</sub> OD) spectrum of compound 2. | 15   |
| S11. HSQC (300 and 75 MHz, CD <sub>3</sub> OD) spectrum of compound 2.                         | 16   |
| S12. HMBC (300 and 75 MHz, CD <sub>3</sub> OD) spectrum of compound 2.                         | 17   |
| S13. HRESIMS spectrum of compound 3.                                                           | 18   |
| S14. <sup>1</sup> H NMR (300 MHz, CD <sub>3</sub> OD) spectrum of compound 3.                  | 19   |
| S15. <sup>13</sup> C NMR (75 MHz, CD <sub>3</sub> OD) spectrum of compound 3.                  | 20   |
| S16. <sup>1</sup> H- <sup>1</sup> H COSY (300 MHz, CD <sub>3</sub> OD) spectrum of compound 3. | 21   |
| S17. HSQC (300 and 75 MHz, CD <sub>3</sub> OD) spectrum of compound 3.                         | 22   |
| S18. HMBC (300 and 75 MHz, CD <sub>3</sub> OD) spectrum of compound 3.                         | 23   |
| S19. HRESIMS spectrum of compound 6.                                                           | 24   |
| S20. <sup>1</sup> H NMR (600 MHz, CD <sub>3</sub> OD) spectrum of compound 6.                  | 25   |
| S21. <sup>13</sup> C NMR (150 MHz, CD <sub>3</sub> OD) spectrum of compound 6.                 | 26   |
| S22. <sup>1</sup> H- <sup>1</sup> H COSY (600 MHz, CD <sub>3</sub> OD) spectrum of compound 6. | 27   |
| S23. HSQC (600 and 150 MHz, CD <sub>3</sub> OD) spectrum of compound 6.                        | 28   |
| S24. HMBC (600 and 150 MHz, CD <sub>3</sub> OD) spectrum of compound 6.                        | 29   |
| S25. ROESY (600 MHz, CD <sub>3</sub> OD) spectrum of compound 6.                               | 30   |
| S26. HRESIMS spectrum of compound 7.                                                           | 31   |
| S27. <sup>1</sup> H NMR (600 MHz, CD <sub>3</sub> OD) spectrum of compound 7.                  | 32   |
| S28. <sup>1</sup> H NMR (600 MHz, CD <sub>3</sub> COCD <sub>3</sub> ) spectrum of compound 7.  | 33   |

|                                                                                                                     |    |
|---------------------------------------------------------------------------------------------------------------------|----|
| <b>S29.</b> $^1\text{H}$ - $^1\text{H}$ COSY (600 MHz, $\text{CD}_3\text{COCD}_3$ ) spectrum of compound <b>7</b> . | 34 |
| <b>S30.</b> HSQC (600 and 150 MHz, $\text{CD}_3\text{COCD}_3$ ) spectrum of compound <b>7</b> .                     | 35 |
| <b>S31.</b> HMBC (600 and 150 MHz, $\text{CD}_3\text{COCD}_3$ ) spectrum of compound <b>7</b> .                     | 36 |
| <b>S32.</b> ROESY (600 MHz, $\text{CD}_3\text{COCD}_3$ ) spectrum of compound <b>7</b>                              | 37 |
| <b>S33.</b> HRESIMS spectrum of compound <b>8</b> .                                                                 | 38 |
| <b>S34.</b> $^1\text{H}$ NMR (600 MHz, $\text{CD}_3\text{COCD}_3$ ) spectrum of compound <b>8</b> .                 | 39 |
| <b>S35.</b> $^1\text{H}$ NMR (600 MHz, $\text{CD}_3\text{OD}$ ) spectrum of compound <b>8</b> .                     | 40 |
| <b>S36.</b> $^1\text{H}$ - $^1\text{H}$ COSY (600 MHz, $\text{CD}_3\text{COCD}_3$ ) spectrum of compound <b>8</b> . | 41 |
| <b>S37.</b> HSQC (600 and 150 MHz, $\text{CD}_3\text{COCD}_3$ ) spectrum of compound <b>8</b> .                     | 42 |
| <b>S38.</b> HMBC (600 and 150 MHz, $\text{CD}_3\text{COCD}_3$ ) spectrum of compound <b>8</b> .                     | 43 |
| <b>S39.</b> ROESY (600 MHz, $\text{CD}_3\text{COCD}_3$ ) spectrum of compound <b>8</b> .                            | 44 |
| <b>S40.</b> HRESIMS spectrum of compound <b>9</b> .                                                                 | 45 |
| <b>S41.</b> $^1\text{H}$ NMR (600 MHz, $\text{CD}_3\text{OD}$ ) spectrum of compound <b>9</b> .                     | 46 |
| <b>S42.</b> $^1\text{H}$ - $^1\text{H}$ COSY (600 MHz, $\text{CD}_3\text{OD}$ ) spectrum of compound <b>9</b> .     | 47 |
| <b>S43.</b> HSQC (600 and 150 MHz, $\text{CD}_3\text{OD}$ ) spectrum of compound <b>9</b> .                         | 48 |
| <b>S44.</b> HMBC (600 and 150 MHz, $\text{CD}_3\text{OD}$ ) spectrum of compound <b>9</b> .                         | 49 |
| <b>S45.</b> ROESY (600 MHz, $\text{CD}_3\text{OD}$ ) spectrum of compound <b>9</b> .                                | 50 |
| <b>S46.</b> HRESIMS spectrum of compound <b>10</b> .                                                                | 51 |
| <b>S47.</b> $^1\text{H}$ NMR (600 MHz, $\text{CD}_3\text{OD}$ ) spectrum of compound <b>10</b> .                    | 52 |
| <b>S48.</b> $^1\text{H}$ - $^1\text{H}$ COSY (600 MHz, $\text{CD}_3\text{OD}$ ) spectrum of compound <b>10</b> .    | 53 |
| <b>S49.</b> HSQC (600 and 150 MHz, $\text{CD}_3\text{OD}$ ) spectrum of compound <b>10</b> .                        | 54 |
| <b>S50.</b> HMBC (600 and 150 MHz, $\text{CD}_3\text{OD}$ ) spectrum of compound <b>10</b> .                        | 55 |
| <b>S51.</b> ROESY (600 MHz, $\text{CD}_3\text{OD}$ ) spectrum of compound <b>10</b> .                               | 56 |
| <b>S52.</b> HRESIMS spectrum of compound <b>11</b> .                                                                | 57 |
| <b>S53.</b> $^1\text{H}$ NMR (300 MHz, $\text{CD}_3\text{OD}$ ) spectrum of compound <b>11</b> .                    | 58 |
| <b>S54.</b> $^{13}\text{C}$ NMR (75 MHz, $\text{CD}_3\text{OD}$ ) spectrum of compound <b>11</b> .                  | 59 |
| <b>S55.</b> $^1\text{H}$ - $^1\text{H}$ COSY (300 MHz, $\text{CD}_3\text{OD}$ ) spectrum of compound <b>11</b> .    | 60 |
| <b>S56.</b> HSQC (300 and 75 MHz, $\text{CD}_3\text{OD}$ ) spectrum of compound <b>11</b> .                         | 61 |
| <b>S57.</b> HMBC (300 and 75 MHz, $\text{CD}_3\text{OD}$ ) spectrum of compound <b>11</b> .                         | 62 |
| <b>S58.</b> ROESY (300 MHz, $\text{CD}_3\text{OD}$ ) spectrum of compound <b>11</b> .                               | 63 |
| <b>S59.</b> HRESIMS spectrum of compound <b>12</b> .                                                                | 64 |

|                                                                                                                       |    |
|-----------------------------------------------------------------------------------------------------------------------|----|
| <b>S60.</b> $^1\text{H}$ NMR (500 MHz, $\text{CD}_3\text{OD}$ ) spectrum of compound <b>12</b> .                      | 65 |
| <b>S61.</b> $^{13}\text{C}$ NMR (125 MHz, $\text{CD}_3\text{OD}$ ) spectrum of compound <b>12</b> .                   | 66 |
| <b>S62.</b> $^1\text{H}$ - $^1\text{H}$ COSY (500 MHz, $\text{CD}_3\text{OD}$ ) spectrum of compound <b>12</b> .      | 67 |
| <b>S63.</b> HSQC (500 and 125 MHz, $\text{CD}_3\text{OD}$ ) spectrum of compound <b>12</b> .                          | 68 |
| <b>S64.</b> HMBC (500 and 125 MHz, $\text{CD}_3\text{OD}$ ) spectrum of compound <b>12</b> .                          | 69 |
| <b>S65.</b> ROESY (500 MHz, $\text{CD}_3\text{OD}$ ) spectrum of compound <b>12</b> .                                 | 70 |
| <b>S66.</b> HRESIMS spectrum of compound <b>13</b> .                                                                  | 71 |
| <b>S67.</b> $^1\text{H}$ NMR (700 MHz, $\text{CD}_3\text{OD}$ ) spectrum of compound <b>13</b> .                      | 72 |
| <b>S68.</b> $^{13}\text{C}$ NMR (175 MHz, $\text{CD}_3\text{OD}$ ) spectrum of compound <b>13</b> .                   | 73 |
| <b>S69.</b> $^1\text{H}$ - $^1\text{H}$ TOCSY NMR (700 MHz, $\text{CD}_3\text{OD}$ ) spectrum of compound <b>13</b> . | 74 |
| <b>S70.</b> HSQC (700 and 175 MHz, $\text{CD}_3\text{OD}$ ) spectrum of compound <b>13</b> .                          | 75 |
| <b>S71.</b> HMBC (700 and 175 MHz, $\text{CD}_3\text{OD}$ ) spectrum of compound <b>13</b> .                          | 76 |
| <b>S72.</b> ROESY (700 MHz, $\text{CD}_3\text{OD}$ ) spectrum of compound <b>13</b> .                                 | 77 |
| <b>S73.</b> HRESIMS spectrum of compound <b>14</b> .                                                                  | 78 |
| <b>S74.</b> $^1\text{H}$ NMR (700 MHz, $\text{CD}_3\text{OD}$ ) spectrum of compound <b>14</b> .                      | 79 |
| <b>S75.</b> $^{13}\text{C}$ NMR (175 MHz, $\text{CD}_3\text{OD}$ ) spectrum of compound <b>14</b> .                   | 80 |
| <b>S76.</b> $^1\text{H}$ - $^1\text{H}$ TOCSY NMR (700 MHz, $\text{CD}_3\text{OD}$ ) spectrum of compound <b>14</b> . | 81 |
| <b>S77.</b> HSQC (700 and 175 MHz, $\text{CD}_3\text{OD}$ ) spectrum of compound <b>14</b> .                          | 82 |
| <b>S78.</b> HMBC (700 and 175 MHz, $\text{CD}_3\text{OD}$ ) spectrum of compound <b>14</b> .                          | 83 |
| <b>S79.</b> ROESY (700 MHz, $\text{CD}_3\text{OD}$ ) spectrum of compound <b>14</b> .                                 | 84 |
| <b>S80.</b> HRESIMS spectrum of compound <b>15</b> .                                                                  | 85 |
| <b>S81.</b> $^1\text{H}$ NMR (300 MHz, $\text{CD}_3\text{OD}$ ) spectrum of compound <b>15</b> .                      | 86 |
| <b>S82.</b> $^1\text{H}$ NMR (300 MHz, $\text{DMSO}-d_6$ ) spectrum of compound <b>15</b> .                           | 87 |
| <b>S83.</b> $^{13}\text{C}$ NMR (75 MHz, $\text{DMSO}-d_6$ ) spectrum of compound <b>15</b> .                         | 88 |
| <b>S84.</b> $^1\text{H}$ - $^1\text{H}$ COSY (300 MHz, $\text{DMSO}-d_6$ ) spectrum of compound <b>15</b> .           | 89 |
| <b>S85.</b> HSQC (300 and 75 MHz, $\text{DMSO}-d_6$ ) spectrum of compound <b>15</b> .                                | 90 |
| <b>S86.</b> HMBC (300 and 75 MHz, $\text{DMSO}-d_6$ ) spectrum of compound <b>15</b> .                                | 91 |
| <b>S87.</b> HRESIMS spectrum of compound <b>16</b> .                                                                  | 92 |
| <b>S88.</b> $^1\text{H}$ NMR (300 MHz, $\text{CD}_3\text{OD}$ ) spectrum of compound <b>16</b> .                      | 93 |
| <b>S89.</b> $^1\text{H}$ - $^1\text{H}$ COSY (300 MHz, $\text{CD}_3\text{OD}$ ) spectrum of compound <b>16</b> .      | 94 |
| <b>S90.</b> HSQC (300 and 75 MHz, $\text{CD}_3\text{OD}$ ) spectrum of compound <b>16</b> .                           | 95 |



|                                                                                                                                                                                                                        |     |
|------------------------------------------------------------------------------------------------------------------------------------------------------------------------------------------------------------------------|-----|
| <b>S91.</b> HMBC (300 and 75 MHz, CD <sub>3</sub> OD) spectrum of compound <b>16</b> .                                                                                                                                 | 96  |
| <b>S92.</b> Experimental ECD spectrum of <b>9</b> in MeCN compared with the Boltzmann-weighted B3LYP/TZVP PCM/MeCN ECD spectrum of (3 <i>S</i> ,7 <i>S</i> )- <b>9</b> computed for the B97D/TZVP PCM/MeCN conformers. | 97  |
| <b>S93.</b> Experimental ECD spectrum of <b>1</b> in MeCN.                                                                                                                                                             | 98  |
| <b>S94.</b> Experimental ECD spectrum of <b>2</b> in MeCN.                                                                                                                                                             | 99  |
| <b>S95.</b> Experimental ECD spectrum of <b>5</b> in MeCN.                                                                                                                                                             | 100 |
| <b>S96.</b> Experimental ECD spectrum of <b>6</b> in MeCN.                                                                                                                                                             | 101 |
| <b>S97.</b> Experimental ECD spectrum of <b>7</b> in MeCN.                                                                                                                                                             | 102 |
| <b>S98.</b> Experimental ECD spectrum of <b>8</b> in MeCN.                                                                                                                                                             | 103 |
| <b>S99.</b> Experimental ECD spectrum of <b>9</b> in MeCN.                                                                                                                                                             | 104 |
| <b>S100.</b> Experimental ECD spectrum of <b>10</b> in MeCN.                                                                                                                                                           | 105 |
| <b>S101.</b> Experimental ECD spectrum of <b>11</b> in MeCN.                                                                                                                                                           | 106 |
| <b>S102.</b> Experimental ECD spectrum of <b>12</b> in MeCN.                                                                                                                                                           | 107 |
| <b>S103.</b> Experimental ECD spectrum of <b>13</b> in MeCN.                                                                                                                                                           | 108 |
| <b>S104.</b> Experimental ECD spectrum of <b>14</b> in MeCN.                                                                                                                                                           | 109 |
| <b>S105.</b> Experimental ECD spectrum of <b>15</b> in MeCN.                                                                                                                                                           | 110 |
| <b>S106.</b> Experimental ECD spectrum of <b>16</b> in MeCN.                                                                                                                                                           | 111 |

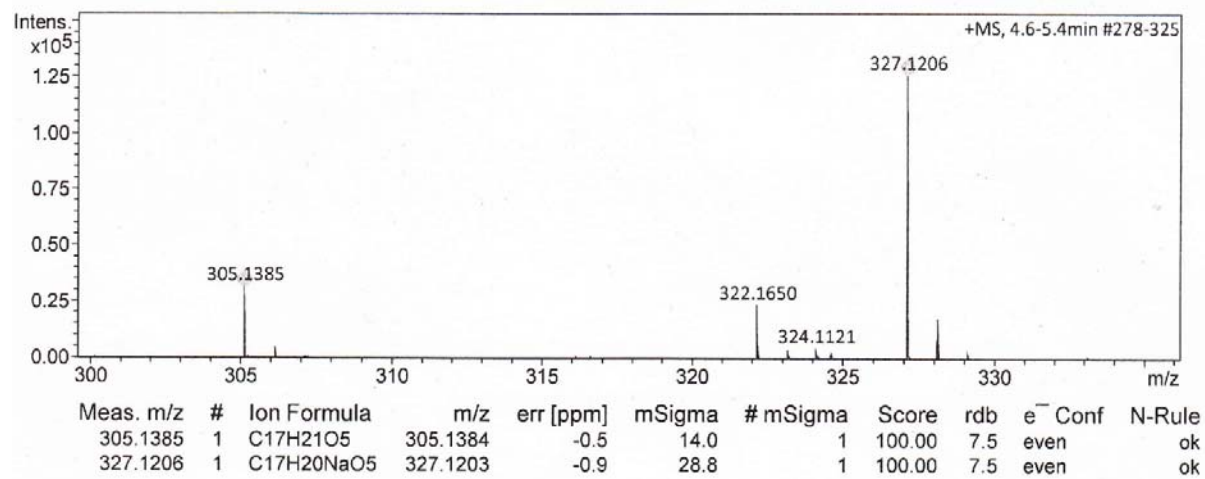

**S1.** HRESIMS spectrum of compound **1**.

Tal60ES5-3-2

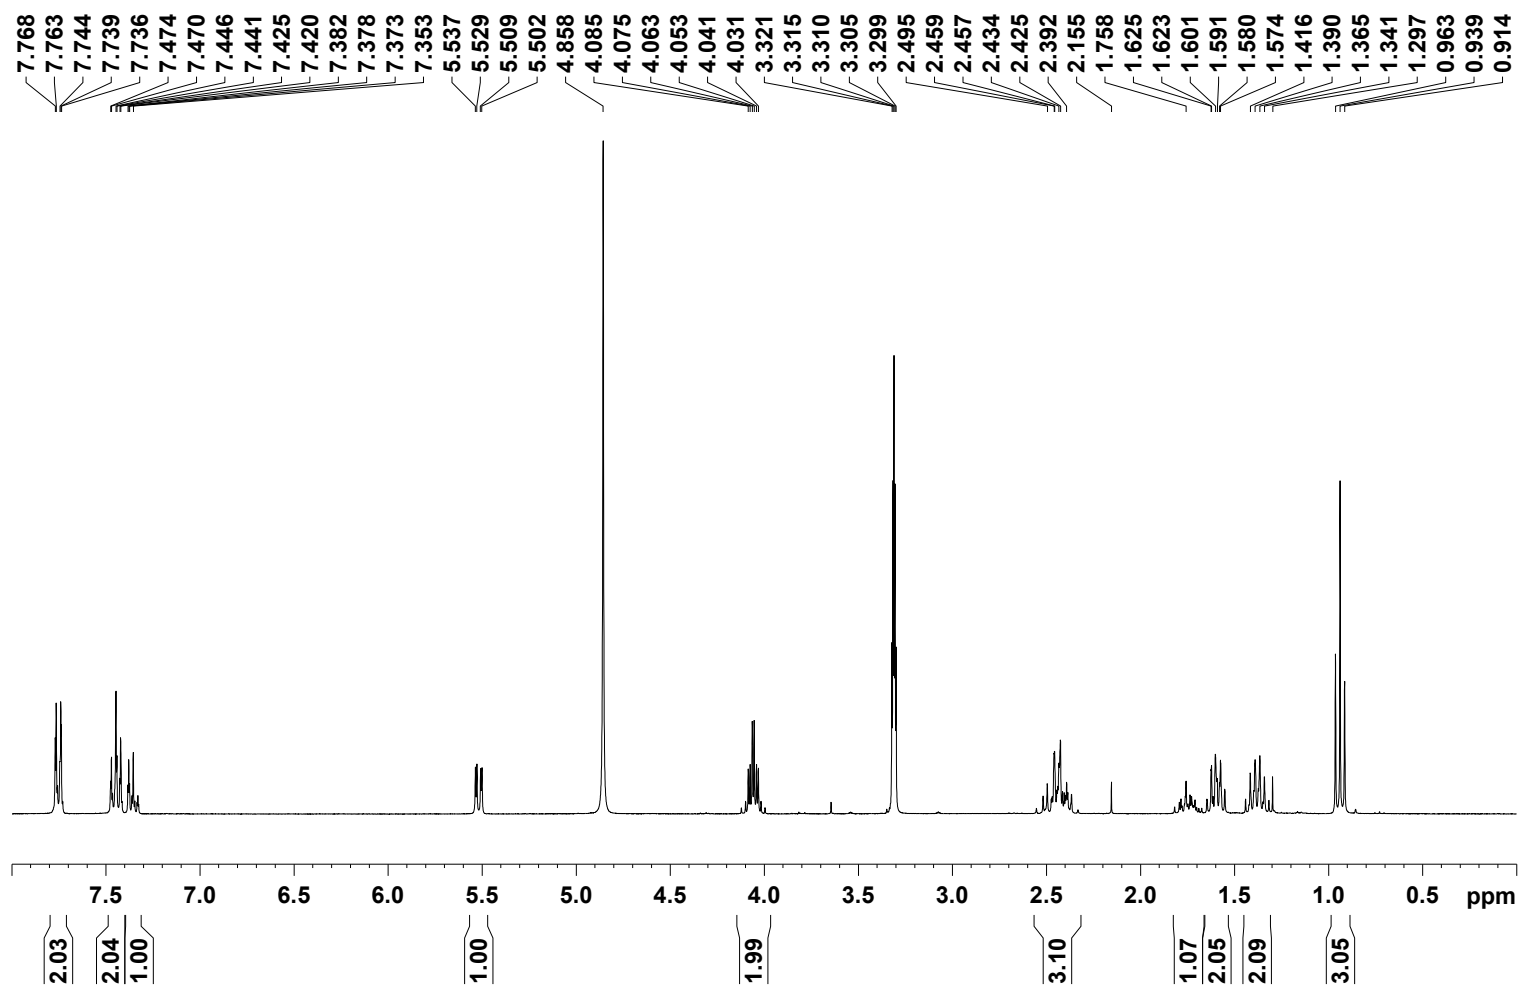

S2.  $^1\text{H}$  NMR (300 MHz,  $\text{CD}_3\text{OD}$ ) spectrum of compound 1.

Tal60ES5-3-2

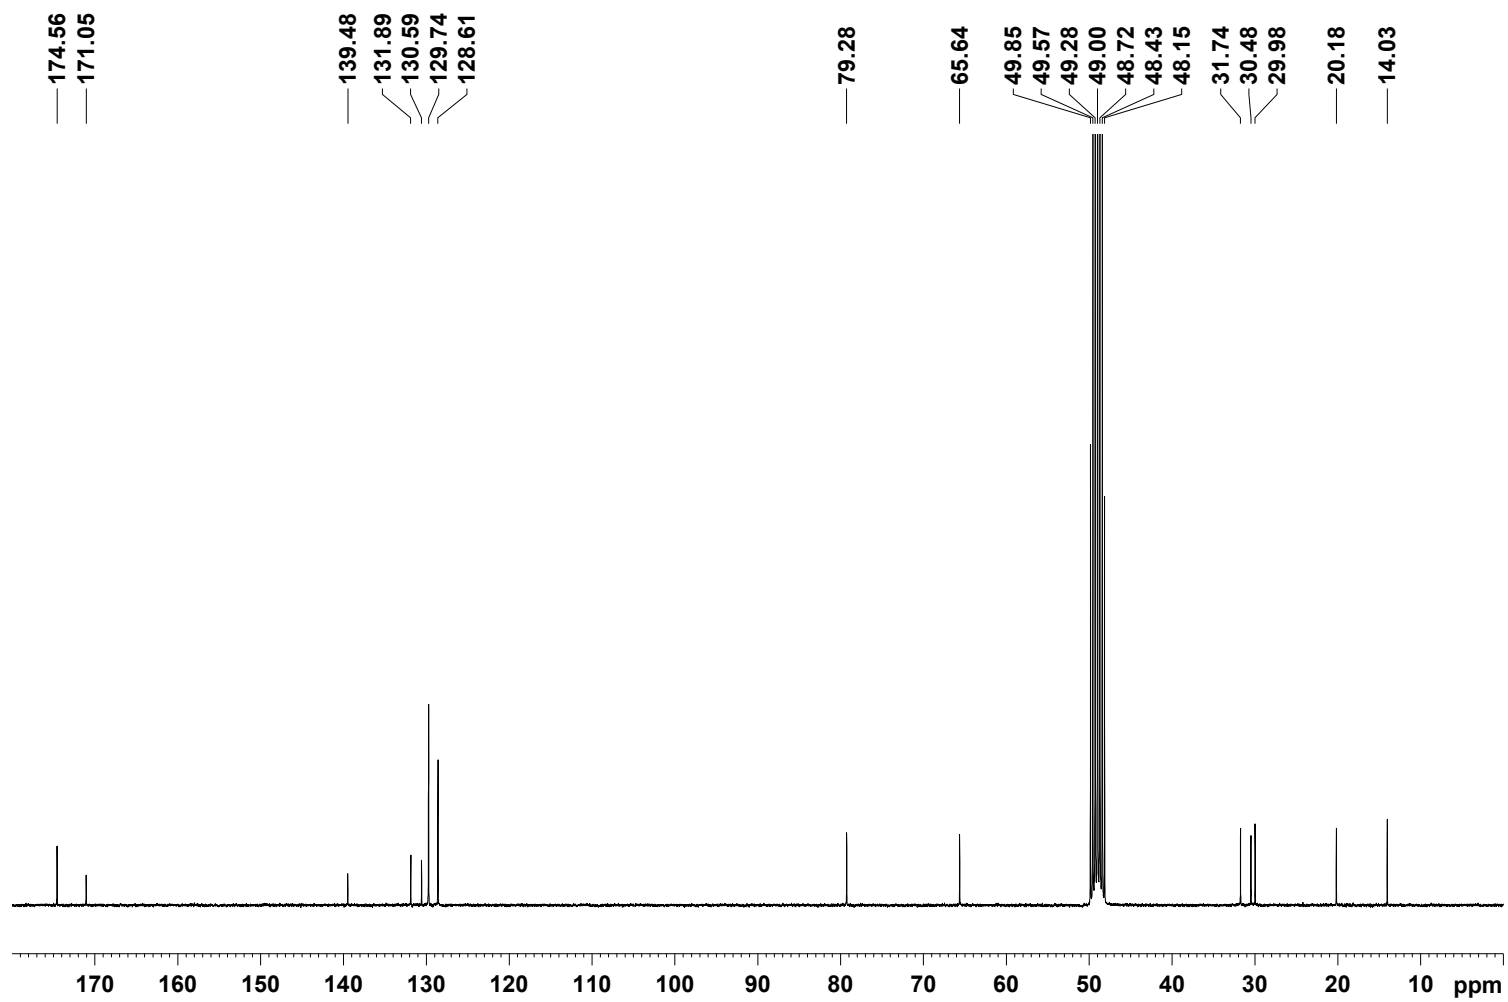

S3.  $^{13}\text{C}$  NMR (75 MHz,  $\text{CD}_3\text{OD}$ ) spectrum of compound **1**.

Tal60ES5-3-2

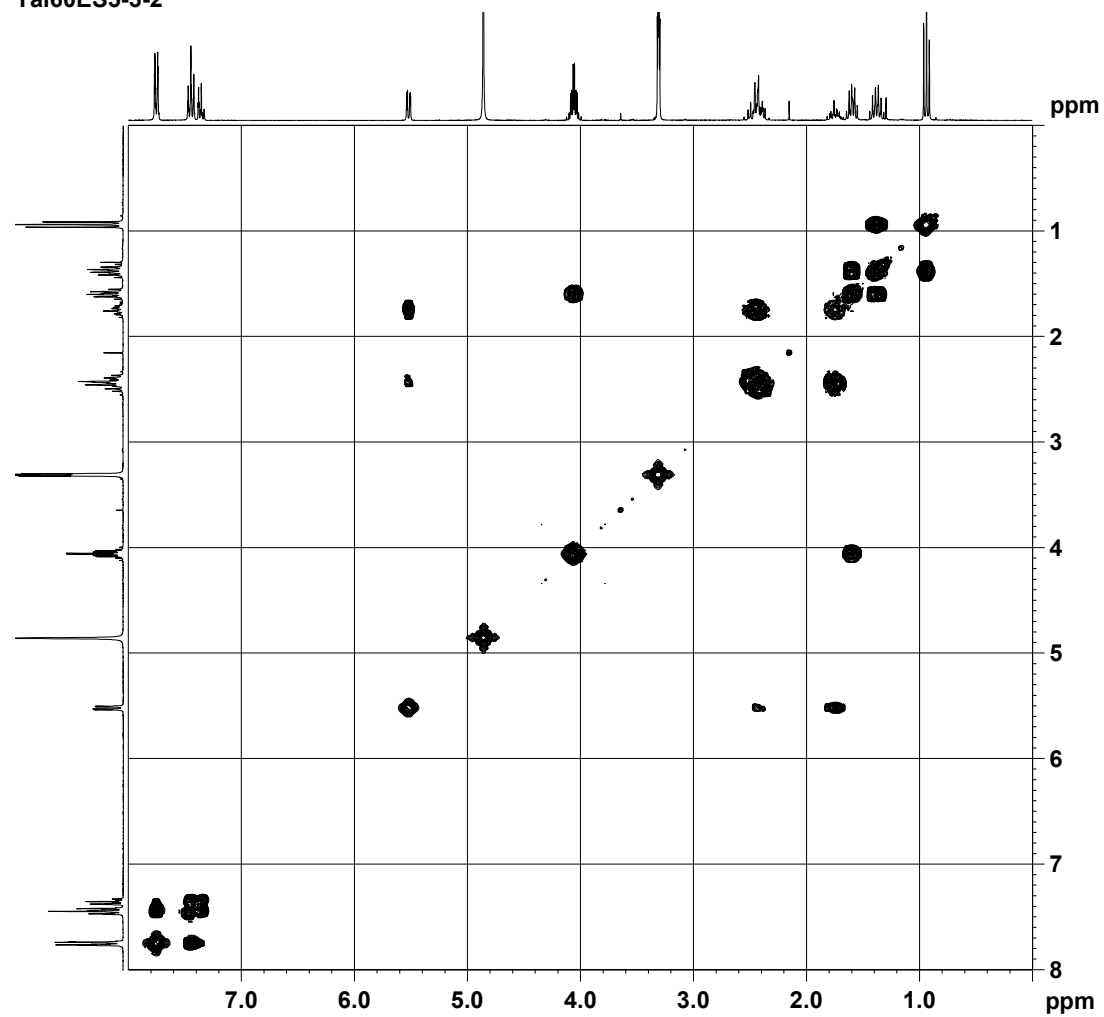

S4. <sup>1</sup>H-<sup>1</sup>H COSY (300 MHz, CD<sub>3</sub>OD) spectrum of compound 1.

Tal60ES5-3-2

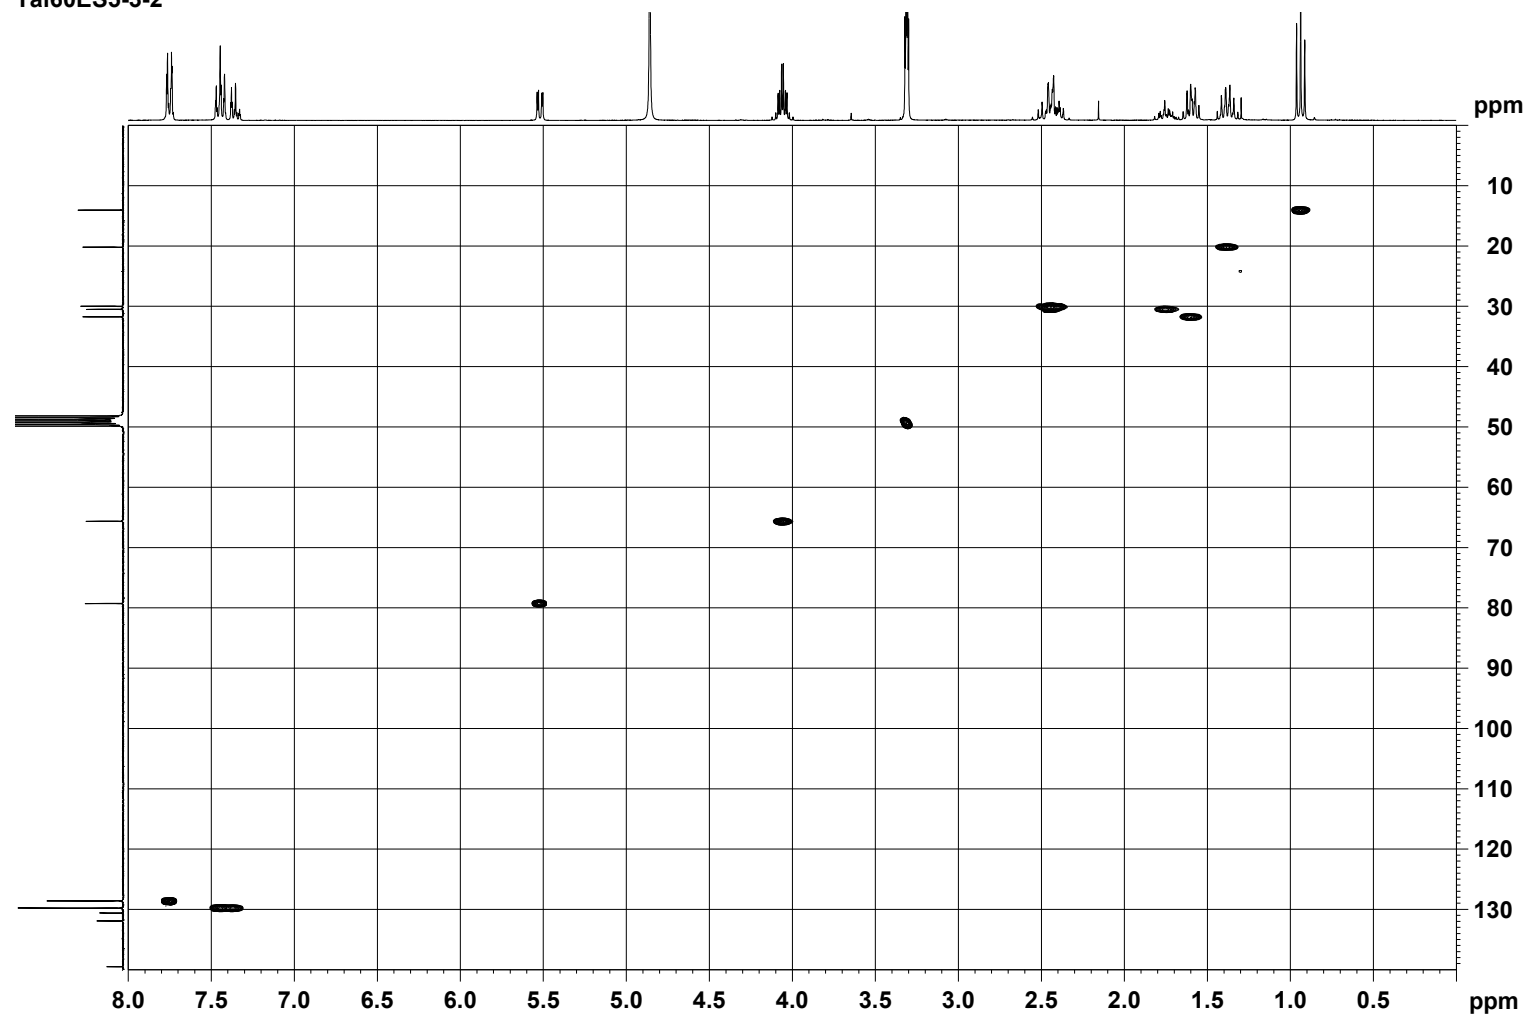

S5. HSQC (300 and 75 MHz,  $\text{CD}_3\text{OD}$ ) spectrum of compound 1.

Tal60ES5-3-2

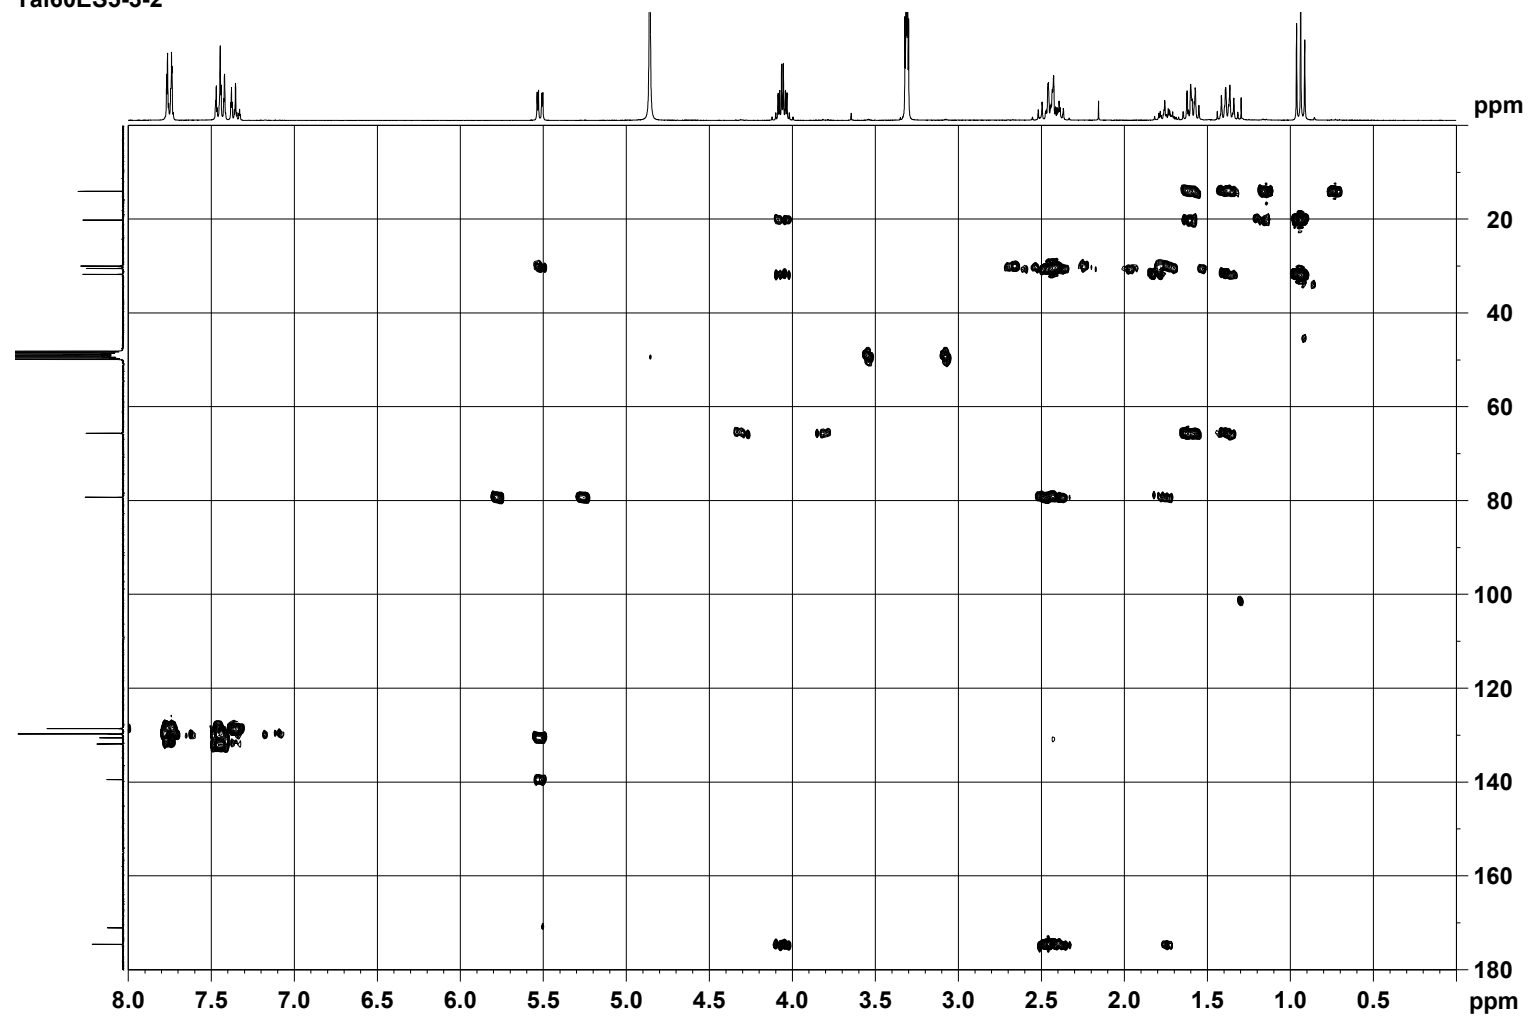

S6. HMBC (300 and 75 MHz,  $\text{CD}_3\text{OD}$ ) spectrum of compound 1.

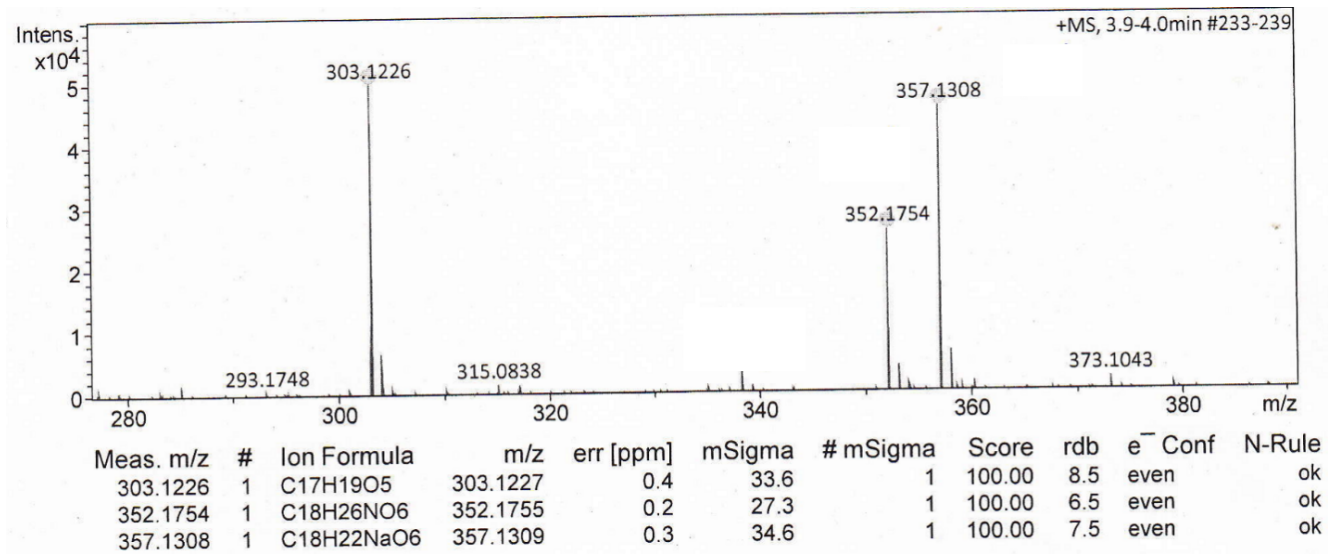

S7. HRESIMS spectrum of compound 2.



Tal80ES 3-3-6-15/15'

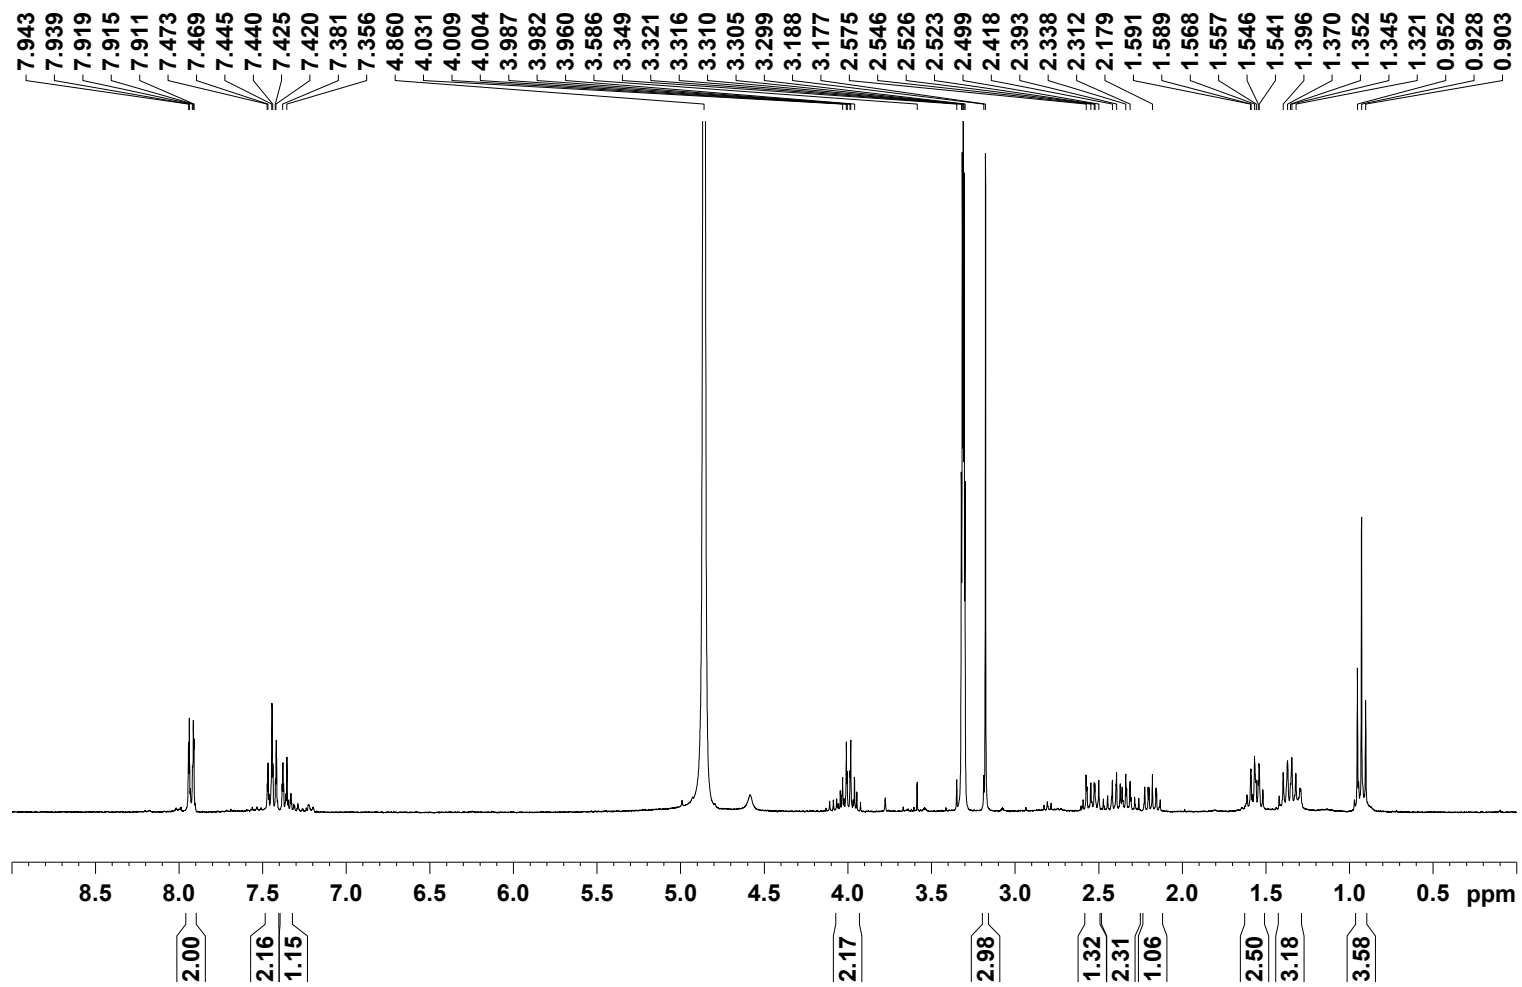

S8.  $^1\text{H}$  NMR (300 MHz,  $\text{CD}_3\text{OD}$ ) spectrum of compound 2.

Tal80ES 3-3-6-15/15'

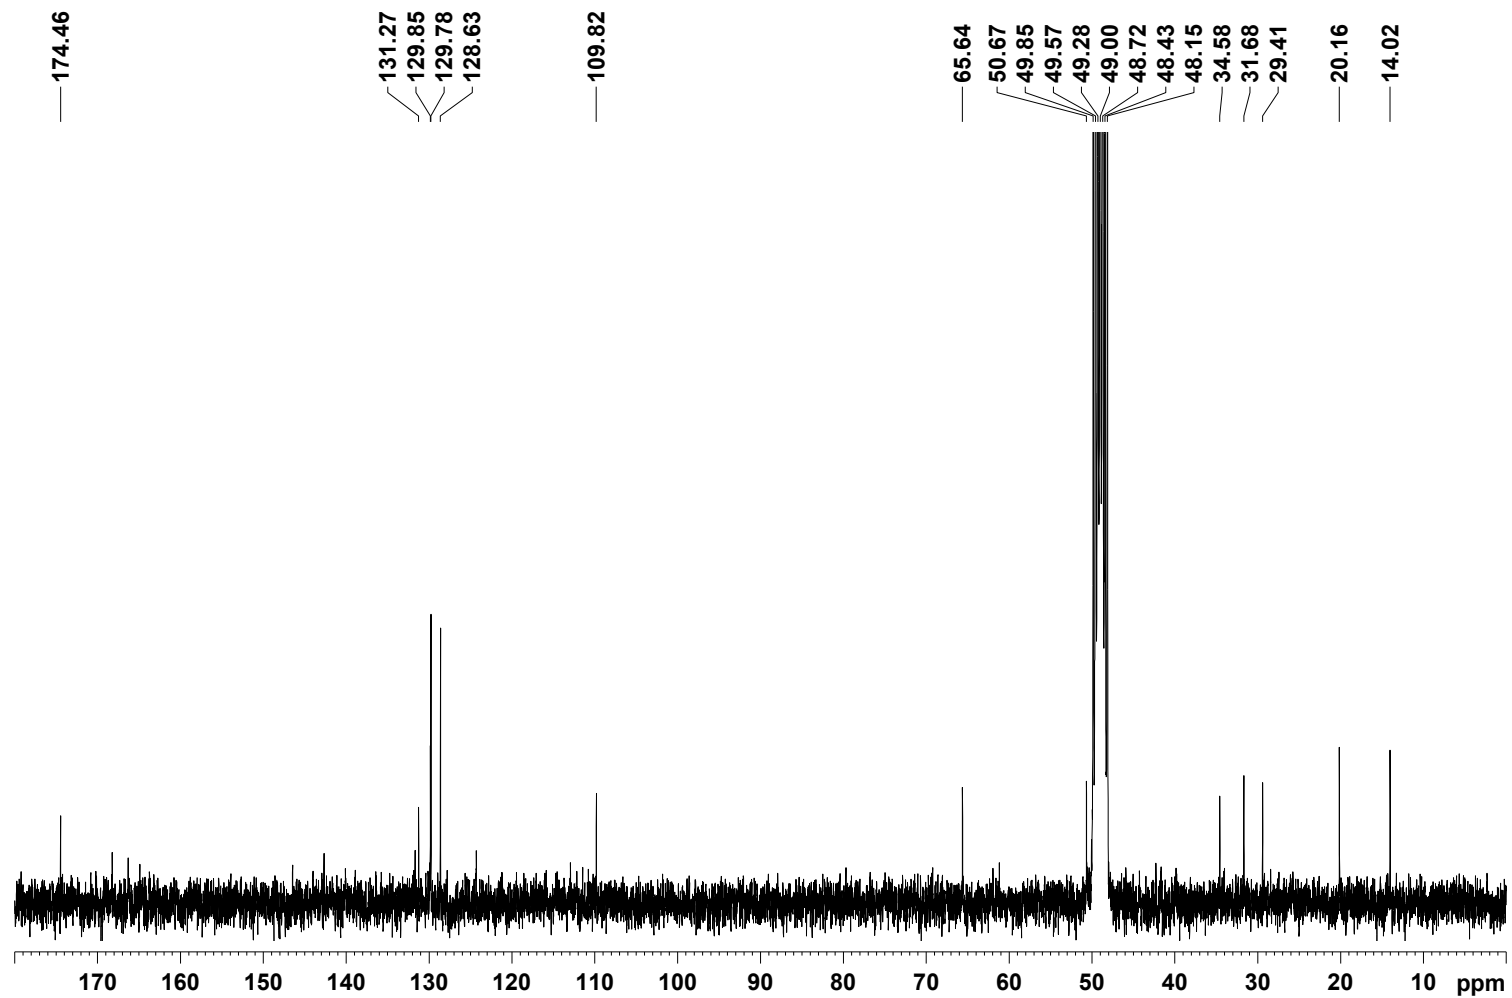

S9.  $^{13}\text{C}$  NMR (75 MHz,  $\text{CD}_3\text{OD}$ ) spectrum of compound 2.

Tal80ES 3-3-6-15/15'

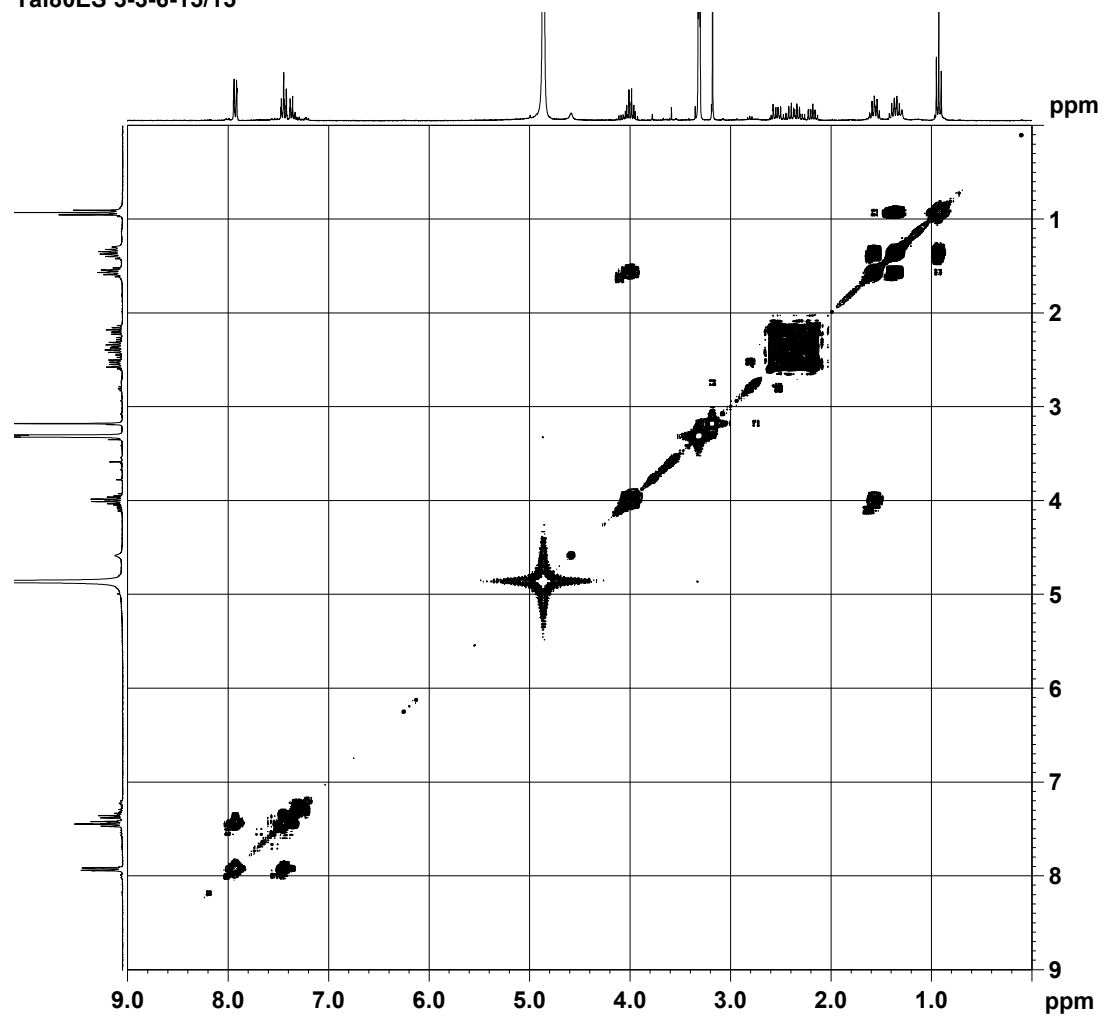

S10.  $^1\text{H}$ - $^1\text{H}$  COSY (300 MHz,  $\text{CD}_3\text{OD}$ ) spectrum of compound 2.

Tal80ES 3-3-6-15/15'

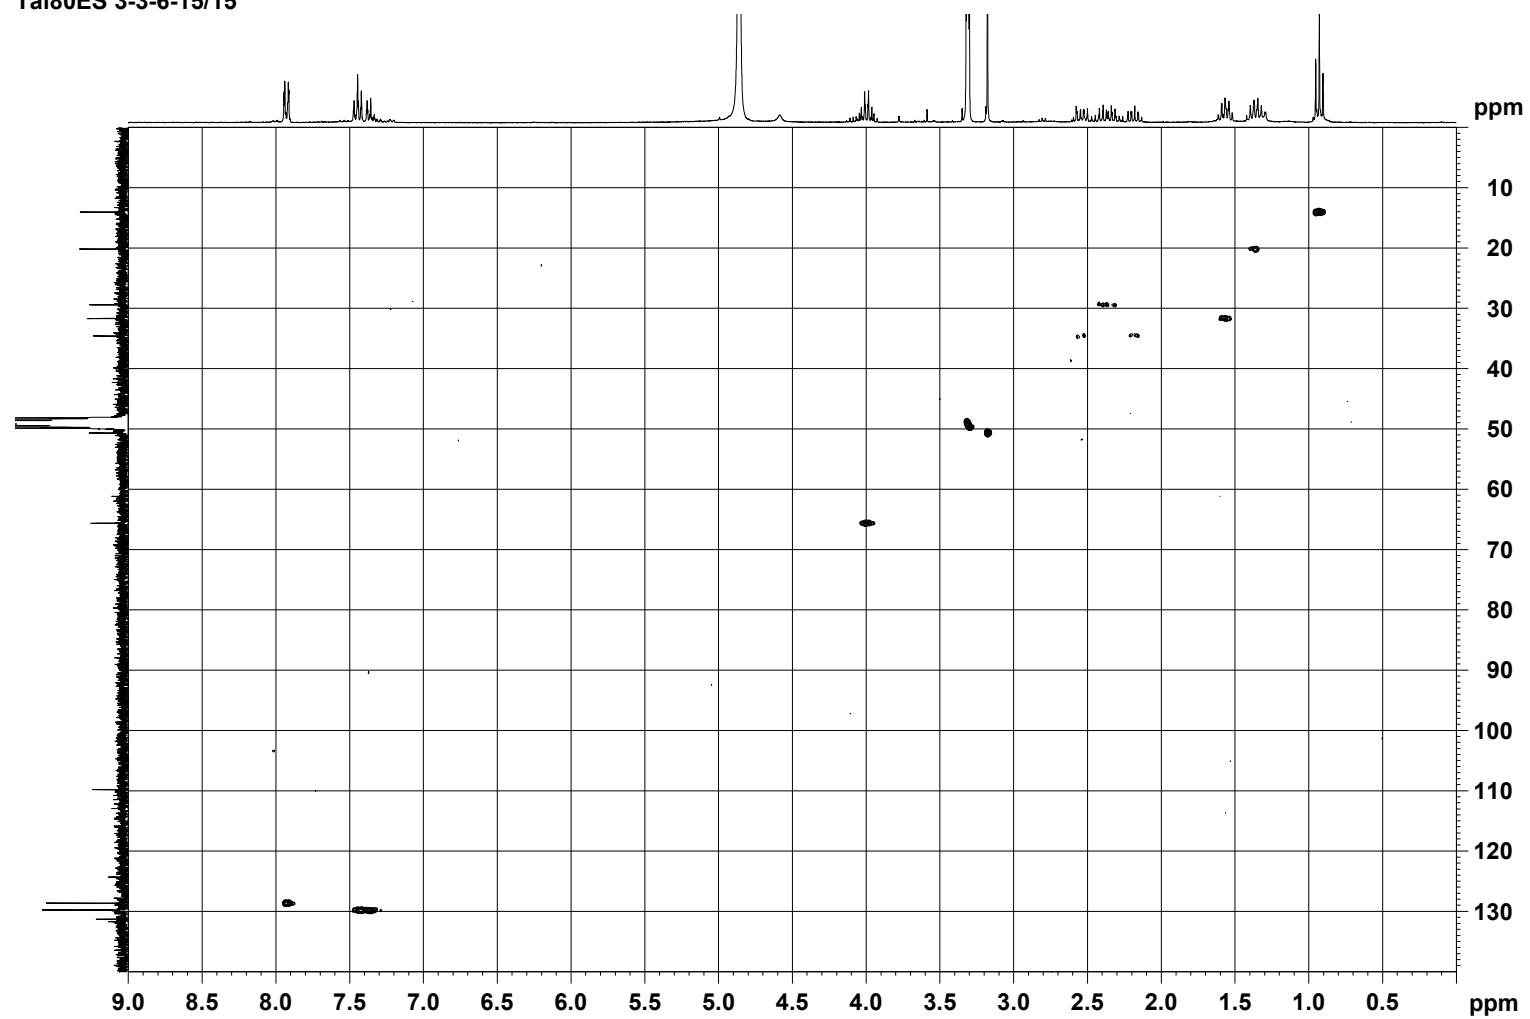

S11. HSQC (300 and 75 MHz,  $\text{CD}_3\text{OD}$ ) spectrum of compound 2.

Tal80ES 3-3-6-15/15'

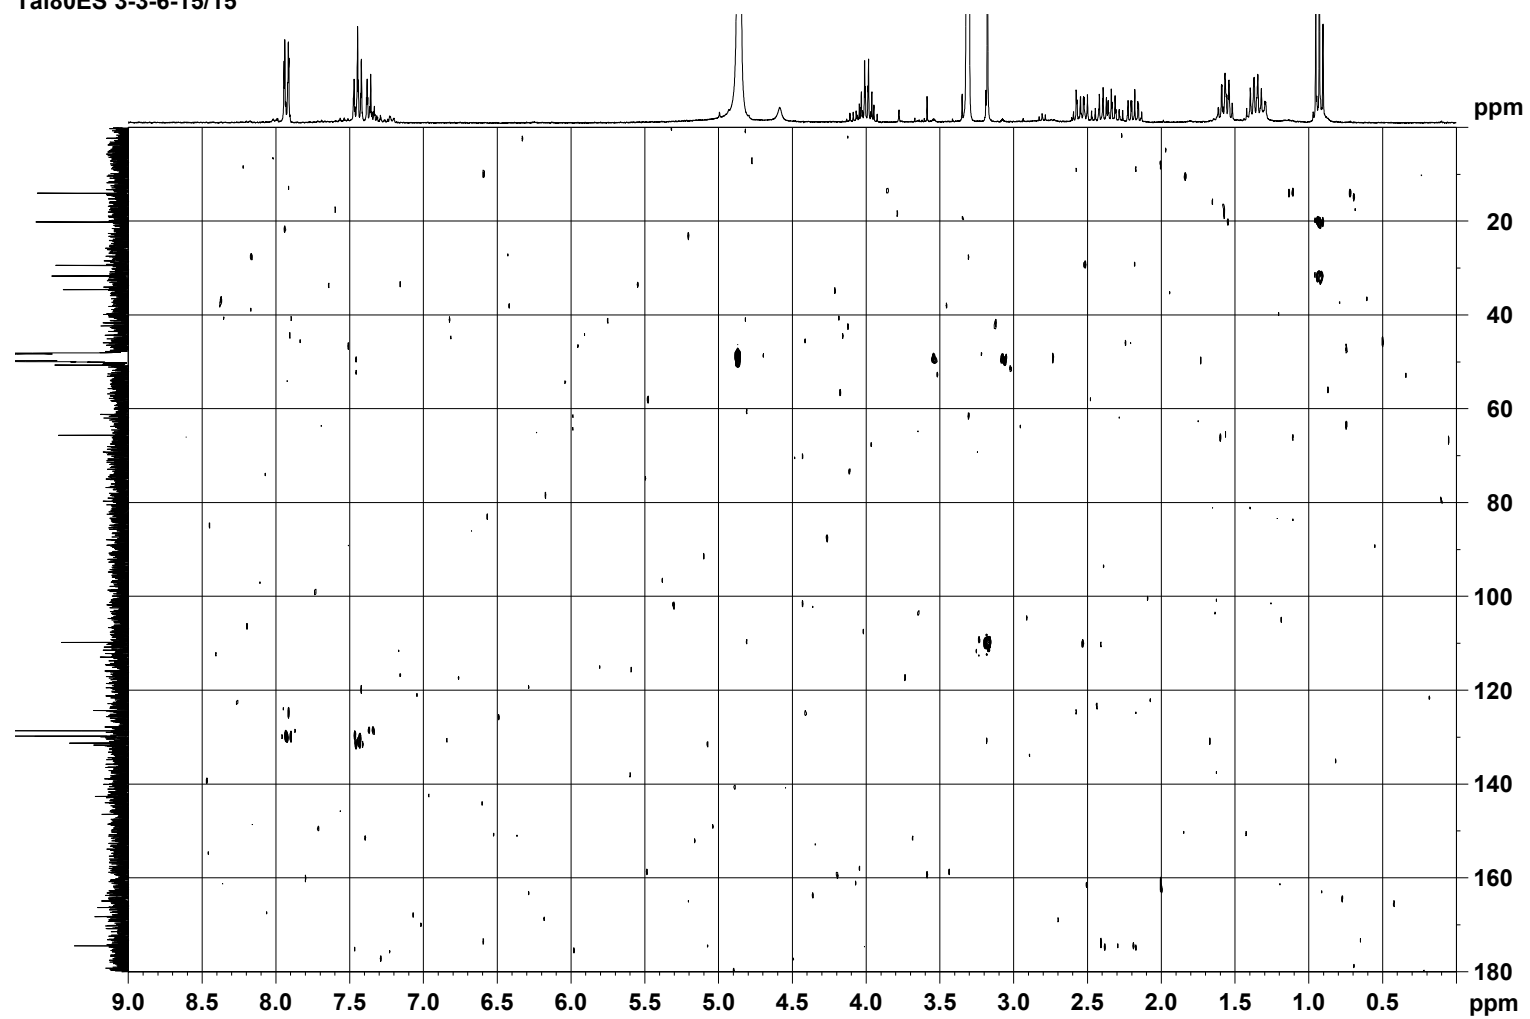

S12. HMBC (300 and 75 MHz,  $\text{CD}_3\text{OD}$ ) spectrum of compound 2.

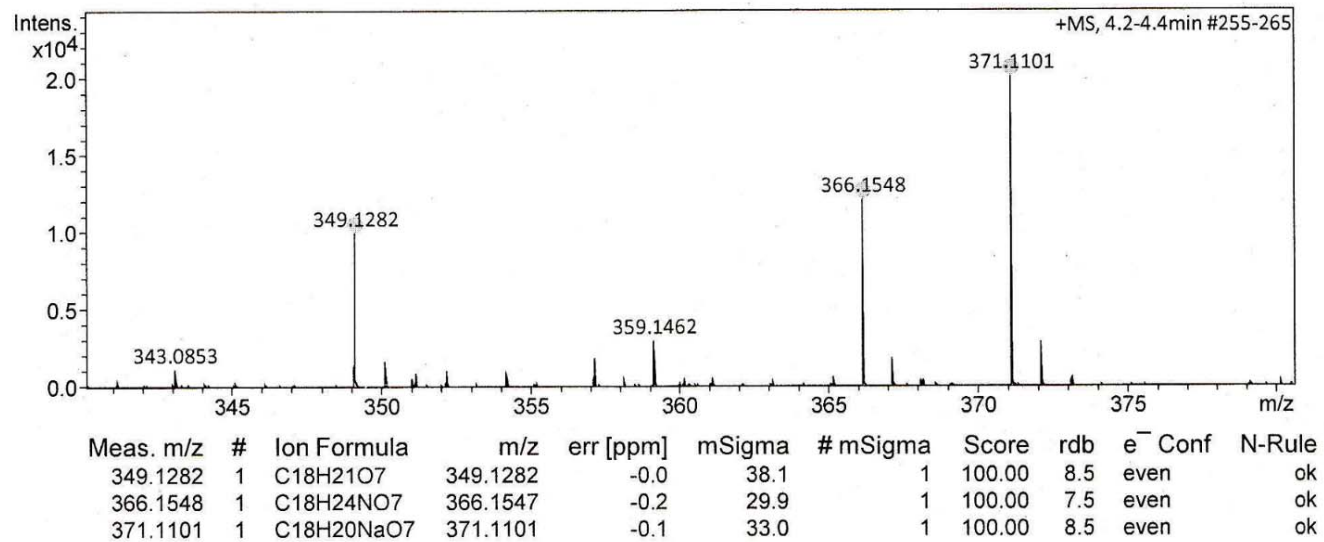

**S13.** HRESIMS spectrum of compound **3**.

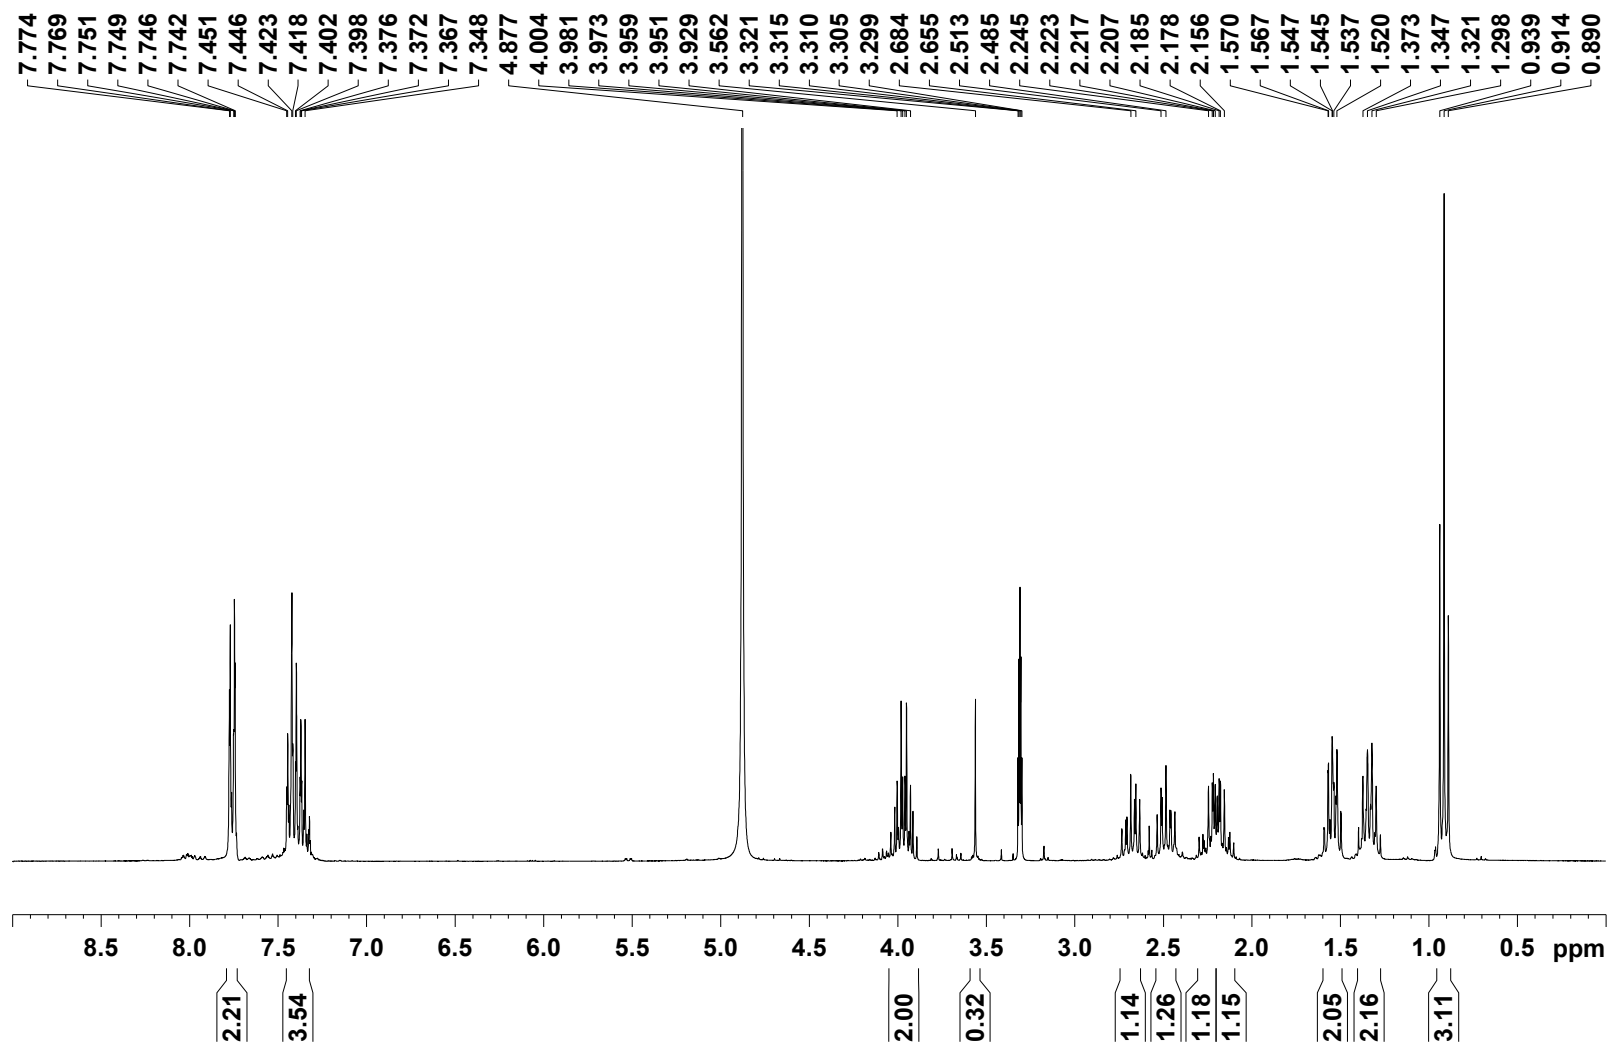

S14.  $^1\text{H}$  NMR (300 MHz,  $\text{CD}_3\text{OD}$ ) spectrum of compound 3.

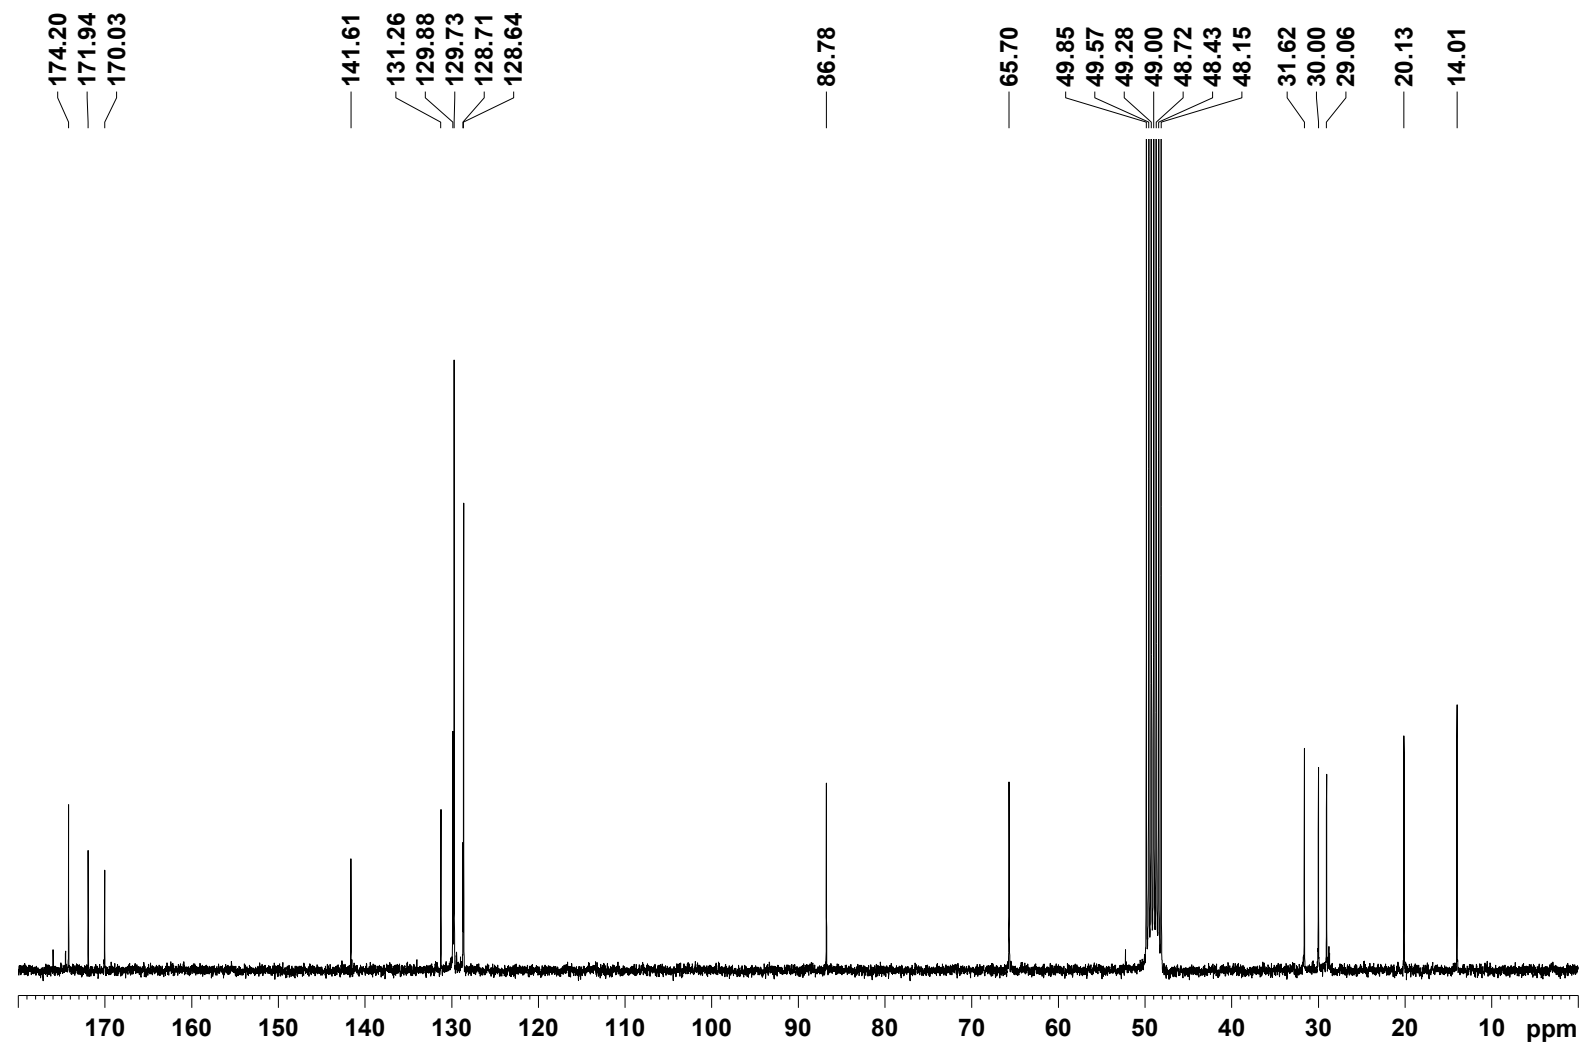

S15.  $^{13}\text{C}$  NMR (75 MHz,  $\text{CD}_3\text{OD}$ ) spectrum of compound 3.



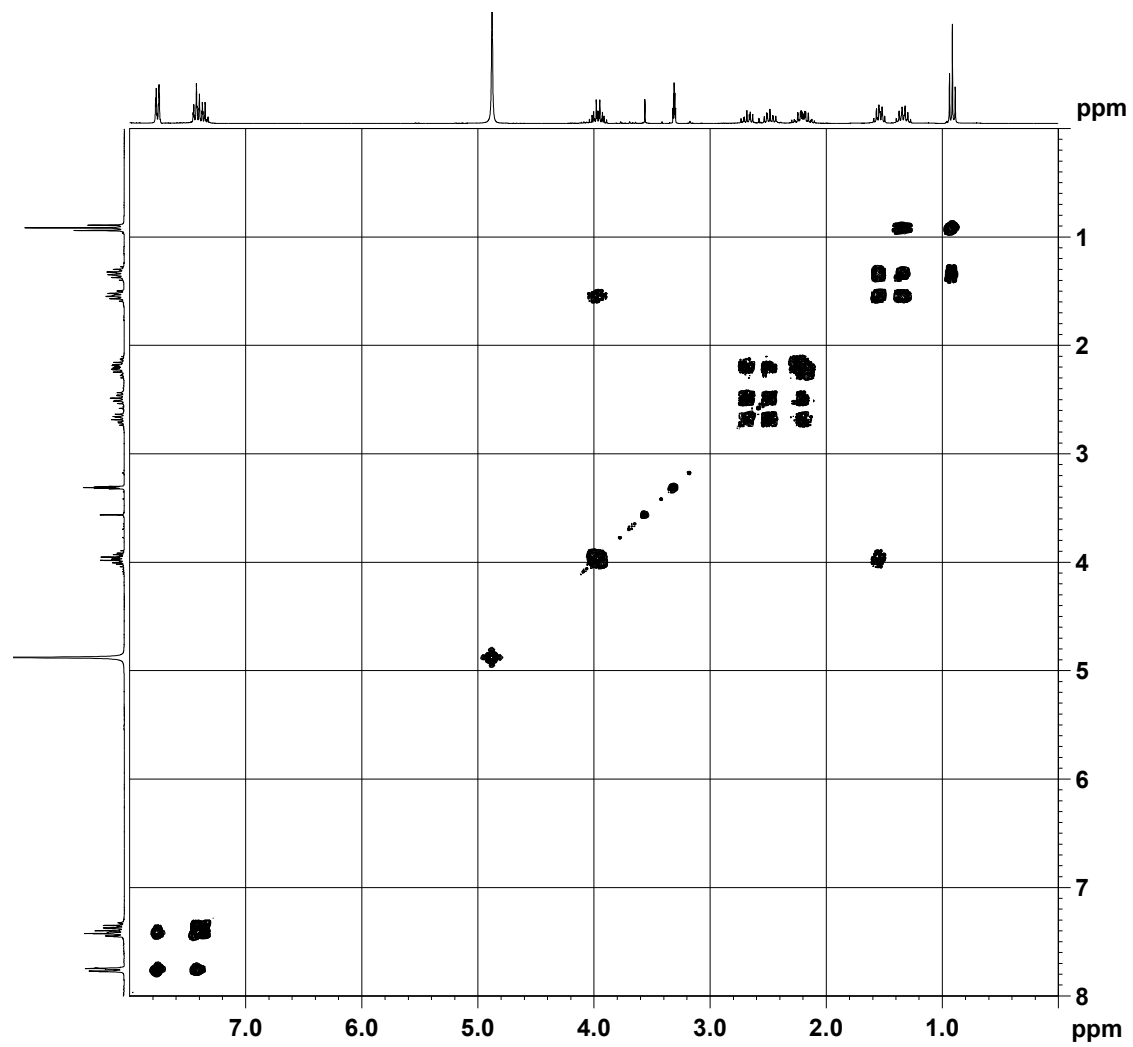

S16.  $^1\text{H}$ - $^1\text{H}$  COSY (300 MHz,  $\text{CD}_3\text{OD}$ ) spectrum of compound 3.

Tal80ES3-3-5-11

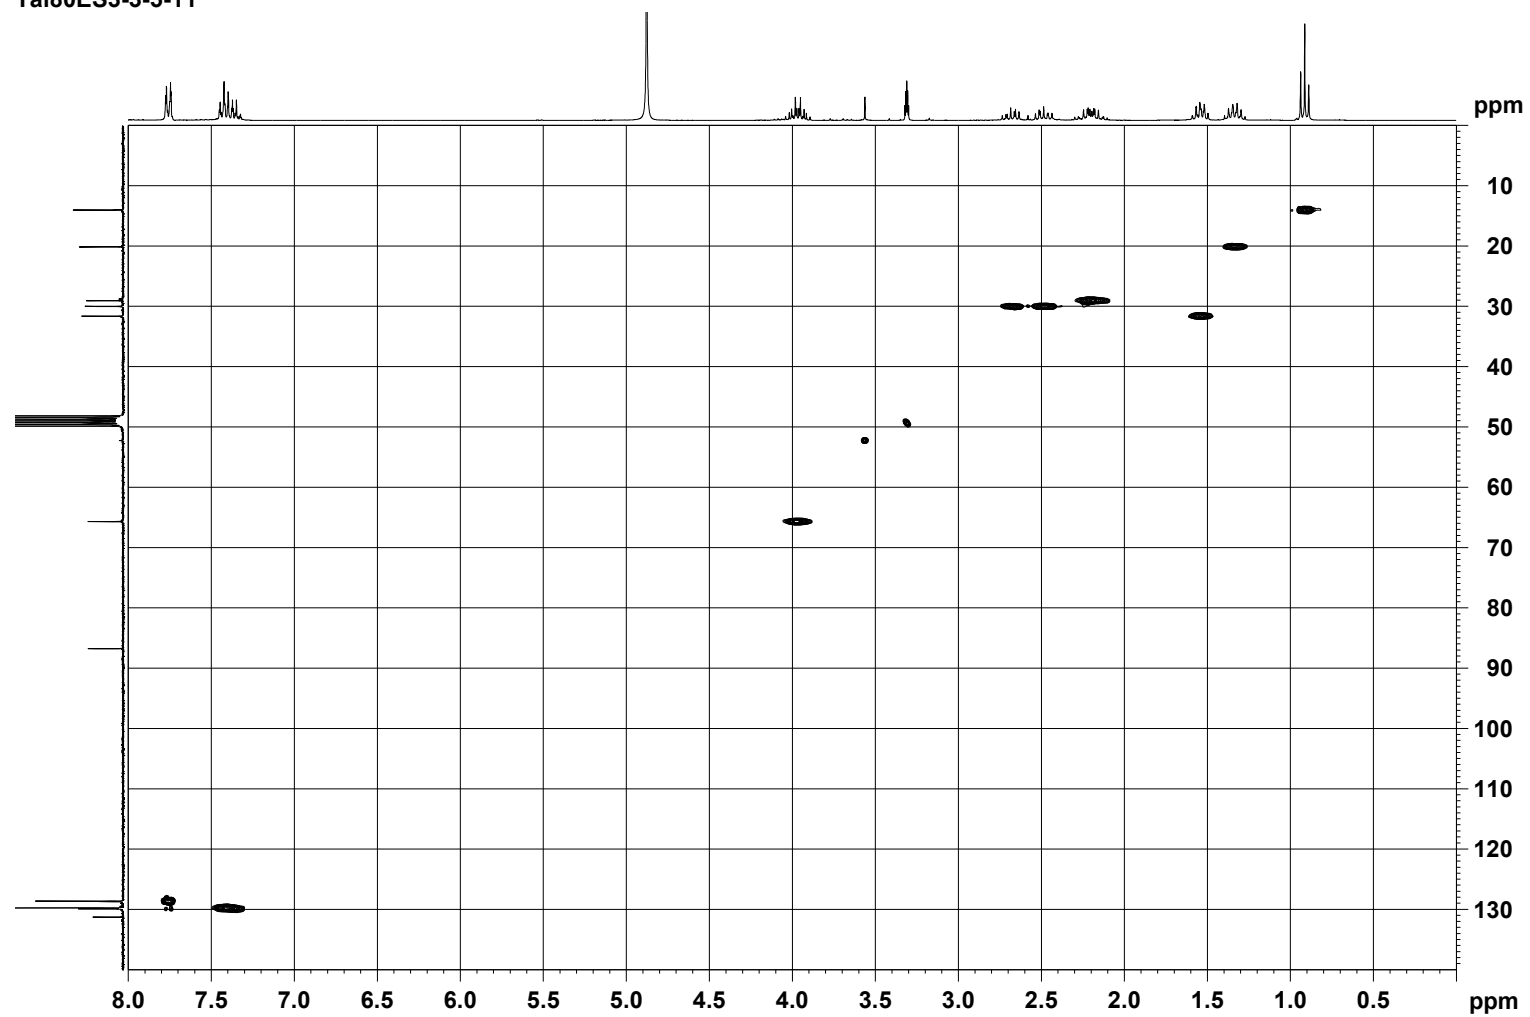

S17. HSQC (300 and 75 MHz, CD<sub>3</sub>OD) spectrum of compound 3.

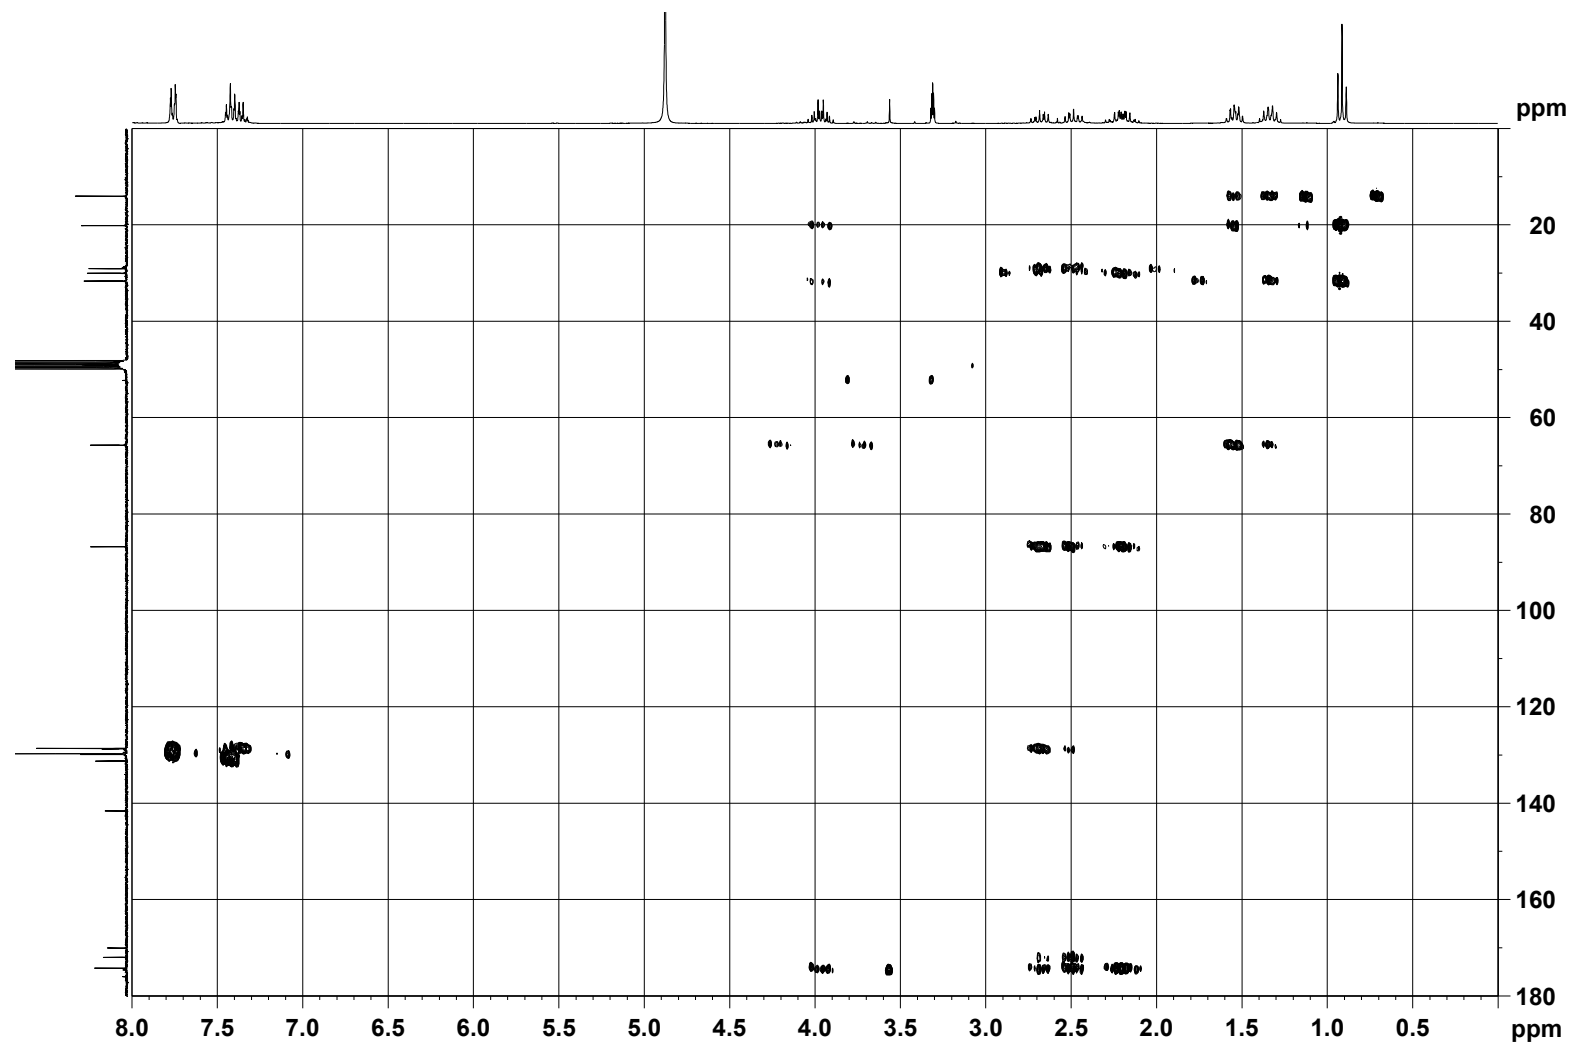

S18. HMBC (300 and 75 MHz, CD<sub>3</sub>OD) spectrum of compound 3.

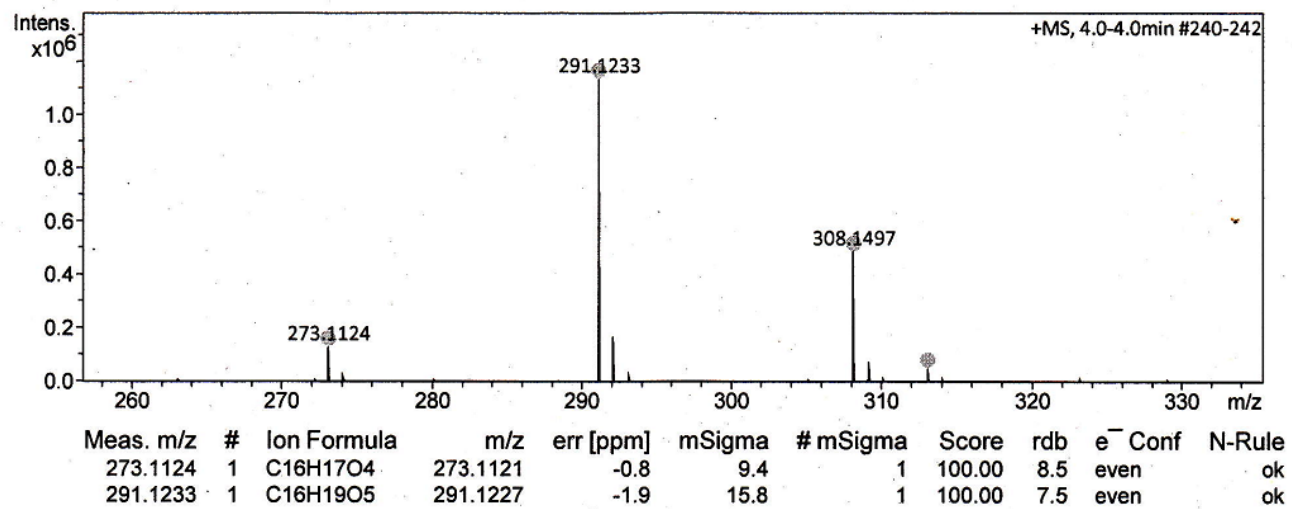

S19. HRESIMS spectrum of compound 6.

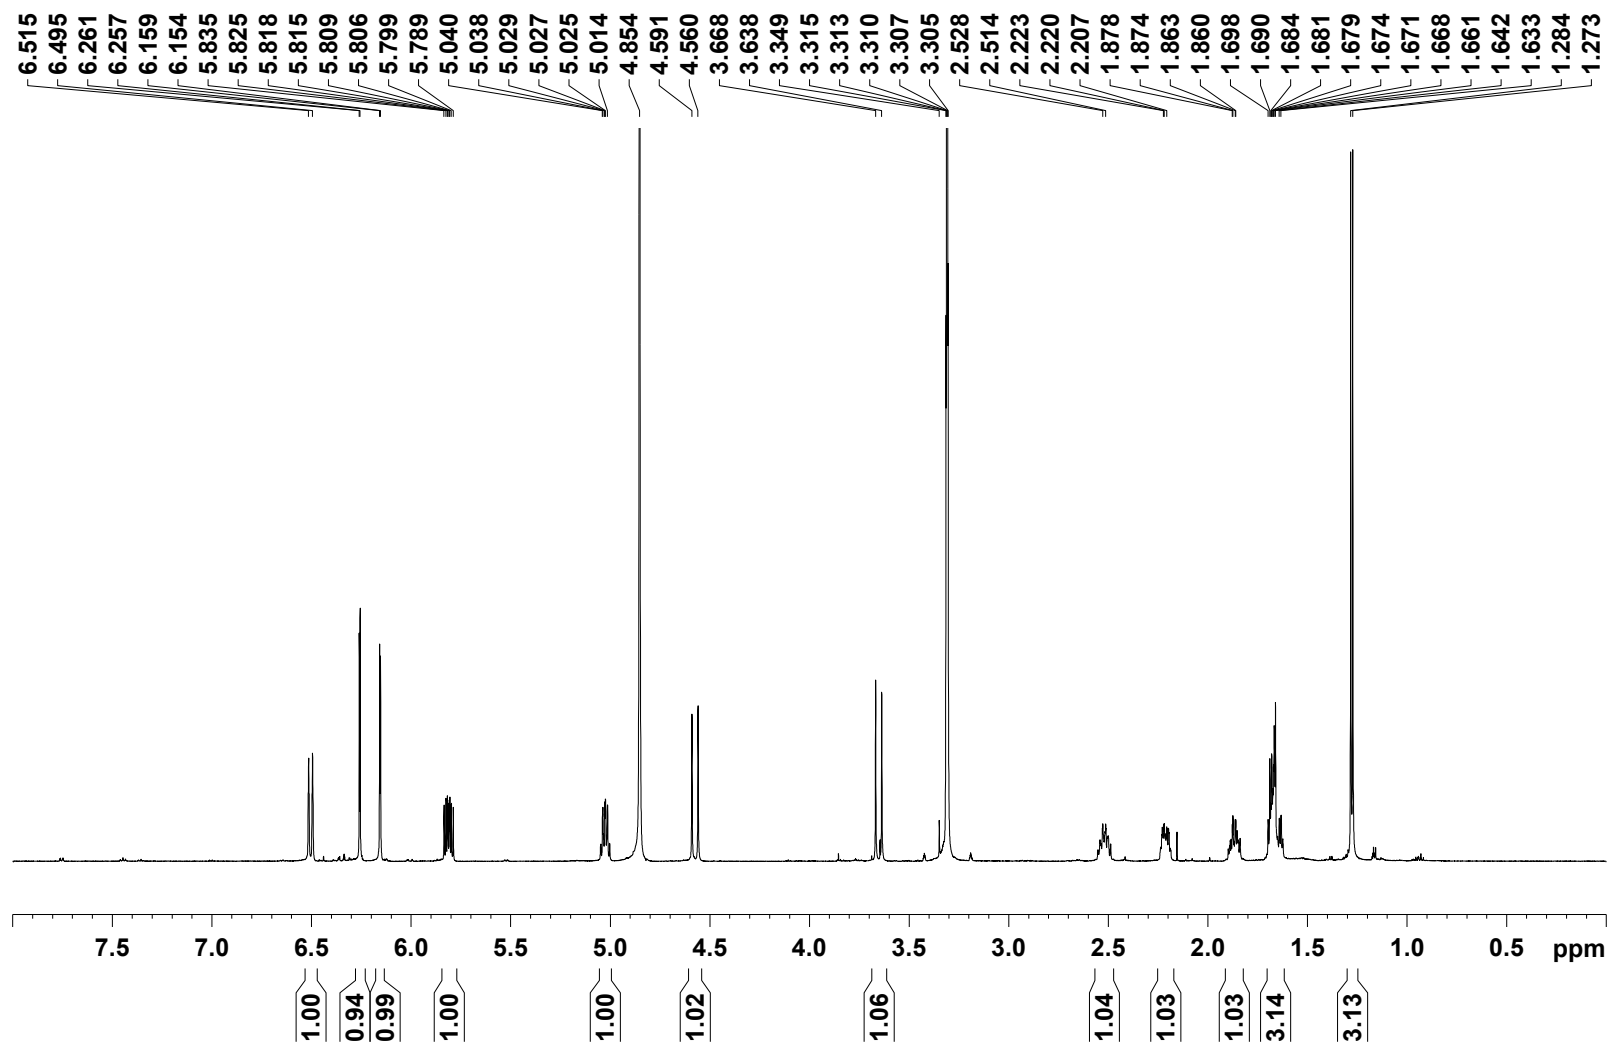

S20.  $^1\text{H}$  NMR (600 MHz,  $\text{CD}_3\text{OD}$ ) spectrum of compound 6.

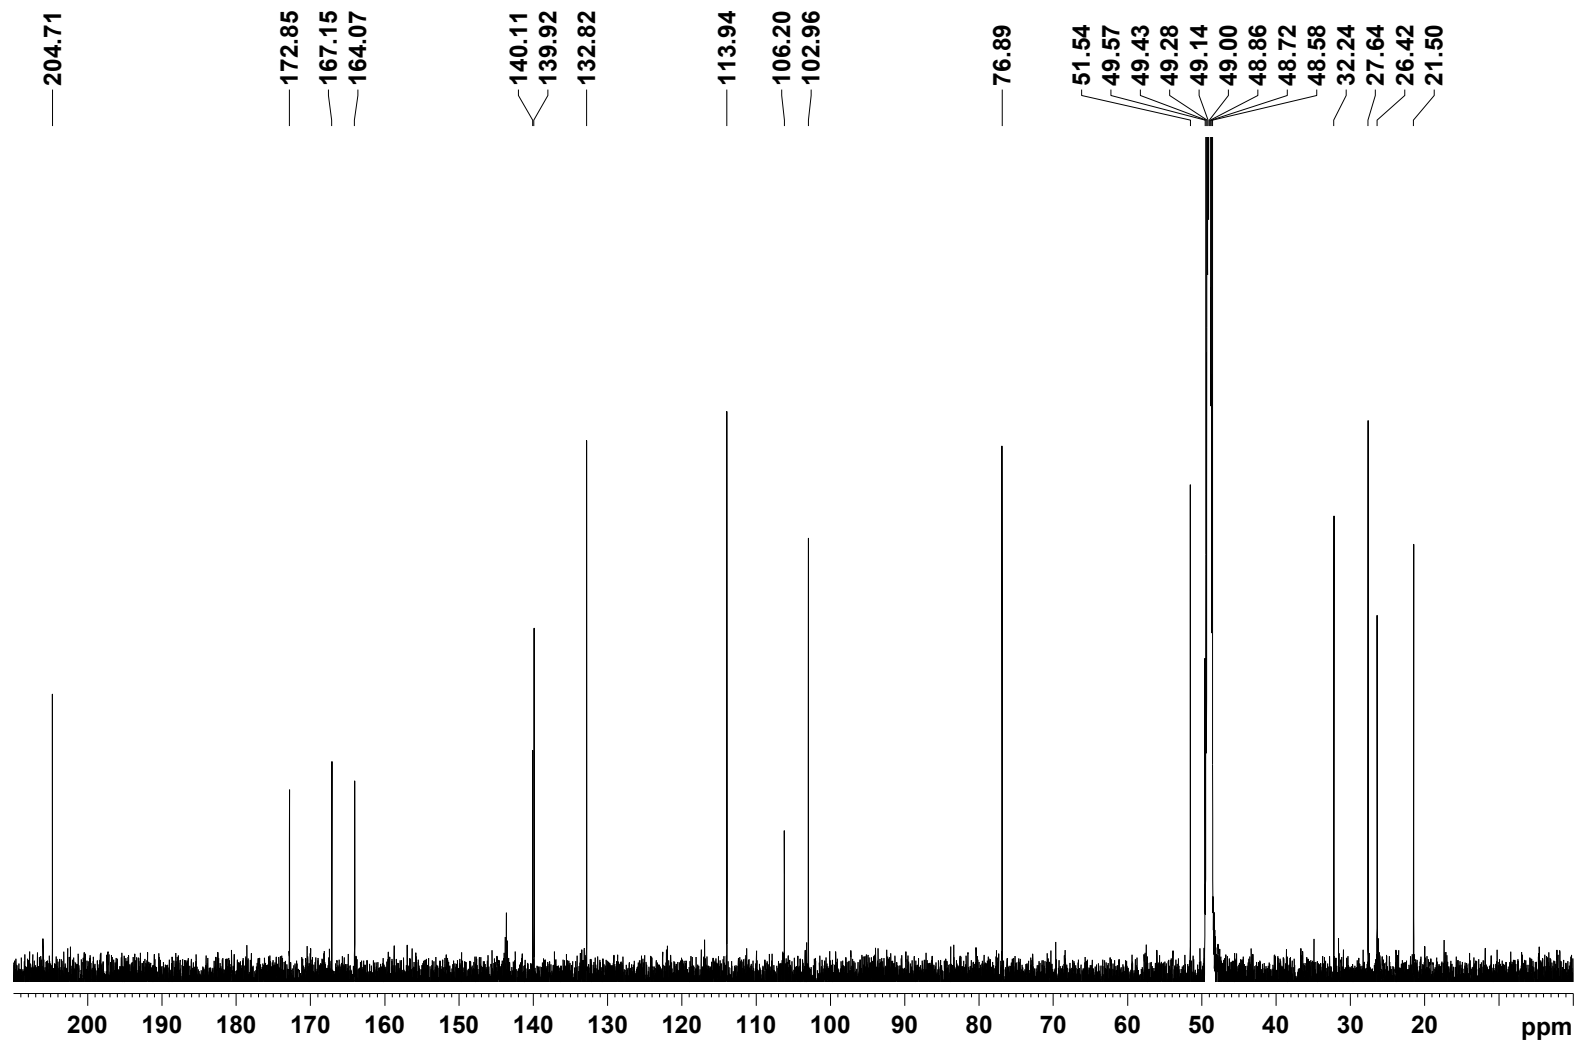

S21.  $^{13}\text{C}$  NMR (150 MHz,  $\text{CD}_3\text{OD}$ ) spectrum of compound 6.

L.K\_A Seven

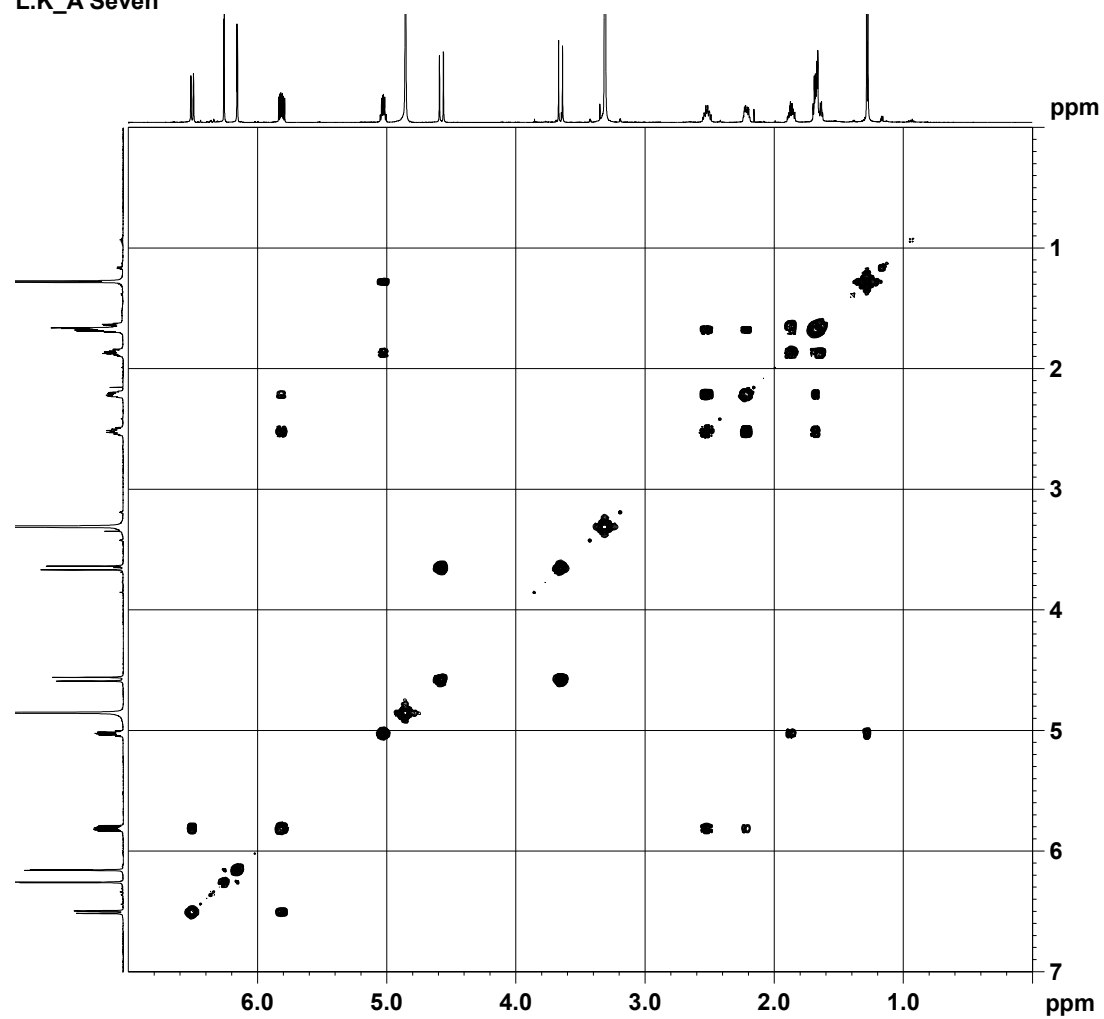

S22.  $^1\text{H}$ - $^1\text{H}$  COSY (600 MHz,  $\text{CD}_3\text{OD}$ ) spectrum of compound 6.

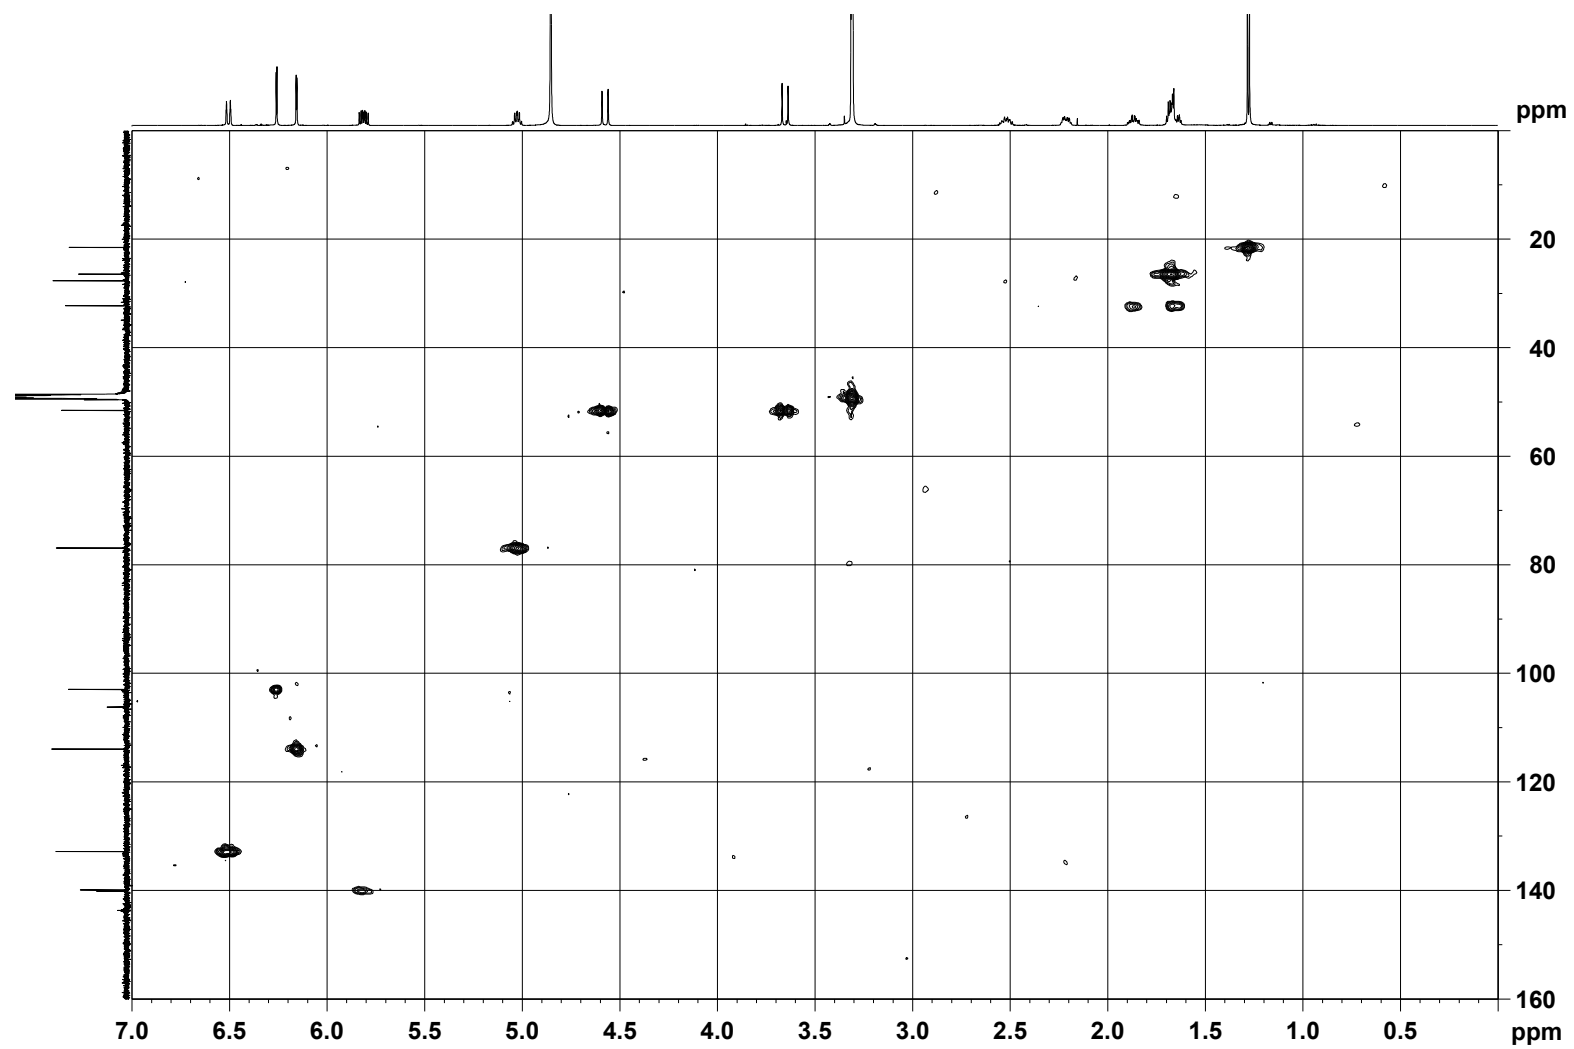

S23. HSQC (600 and 150 MHz, CD<sub>3</sub>OD) spectrum of compound 6.



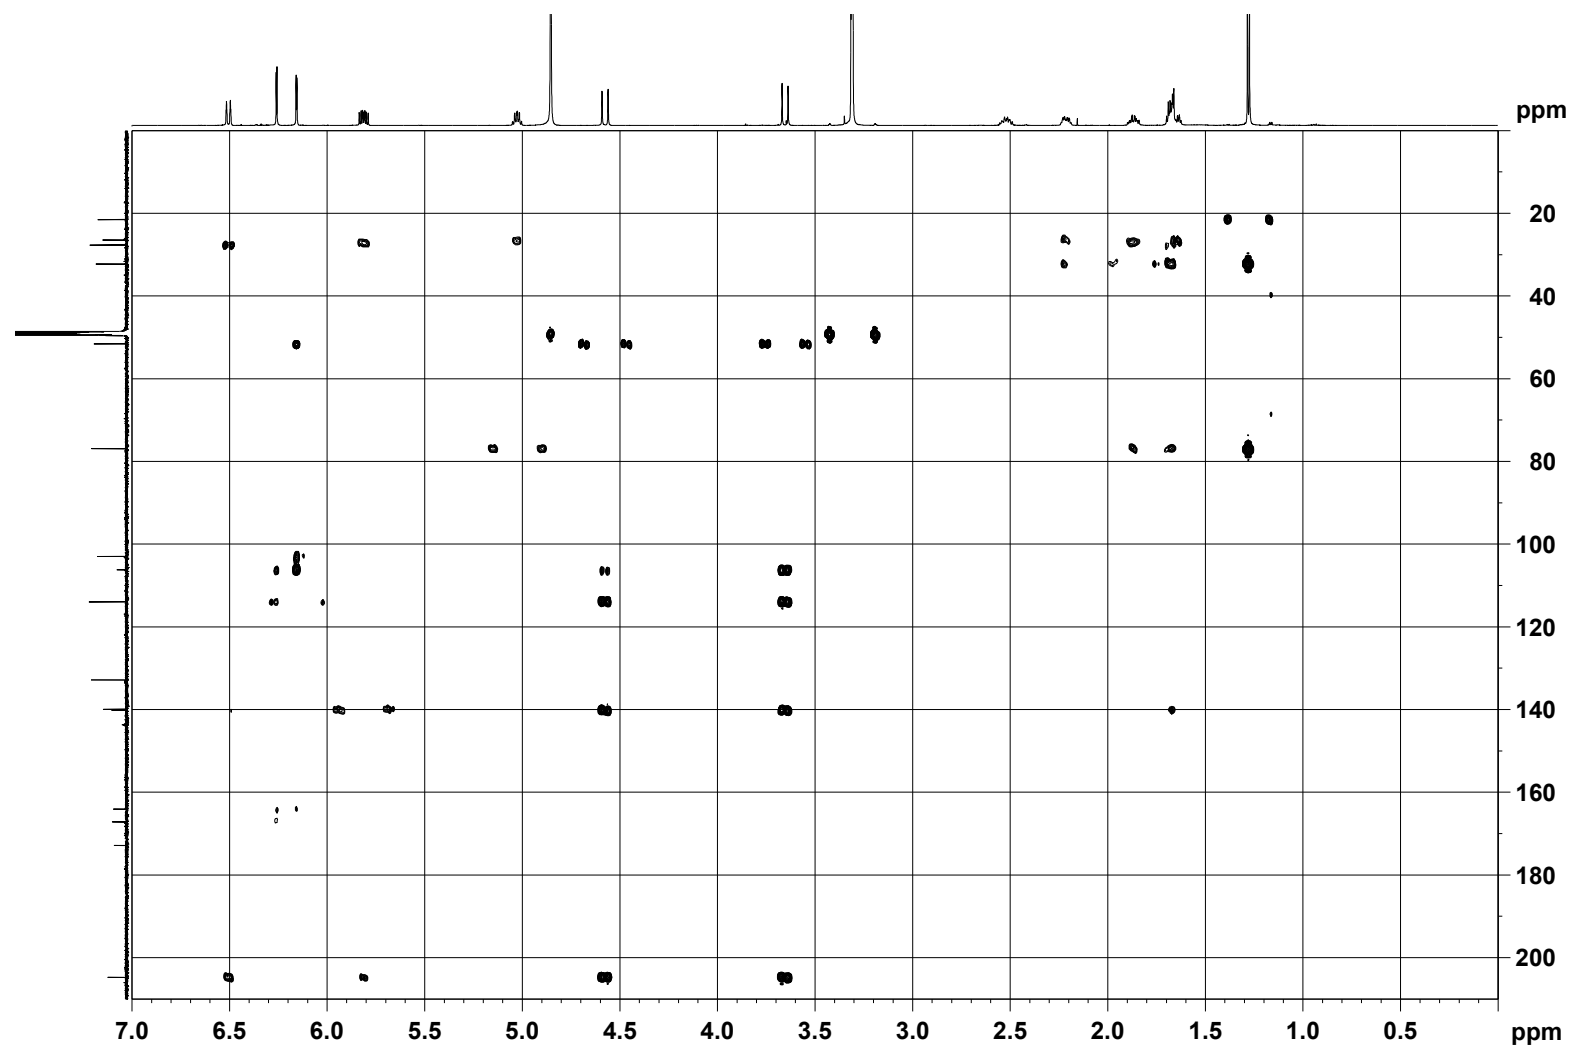

S24. HMBC (600 and 150 MHz,  $\text{CD}_3\text{OD}$ ) spectrum of compound 6.

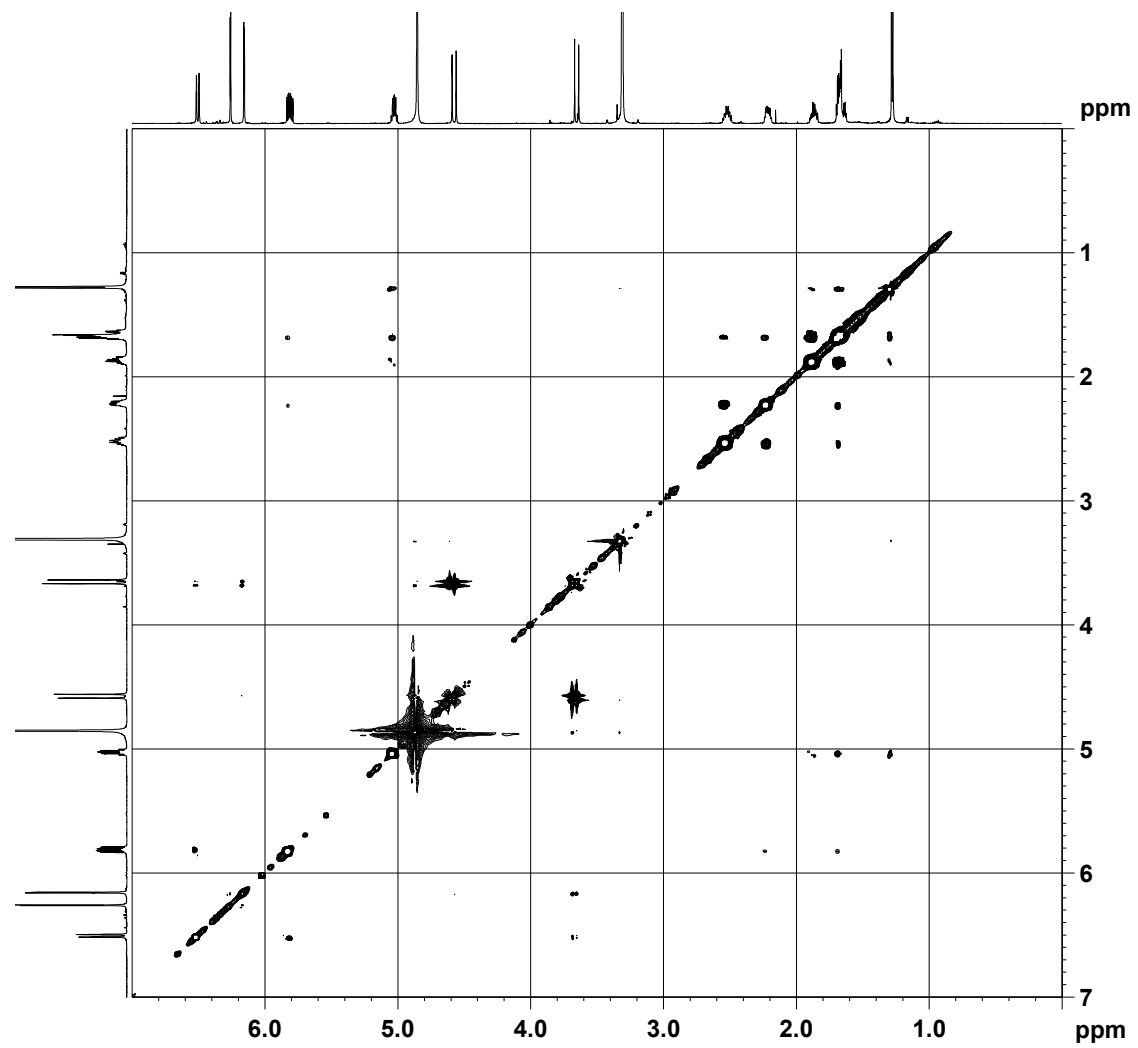

S25. ROESY (600 MHz, CD<sub>3</sub>OD) spectrum of compound 6.

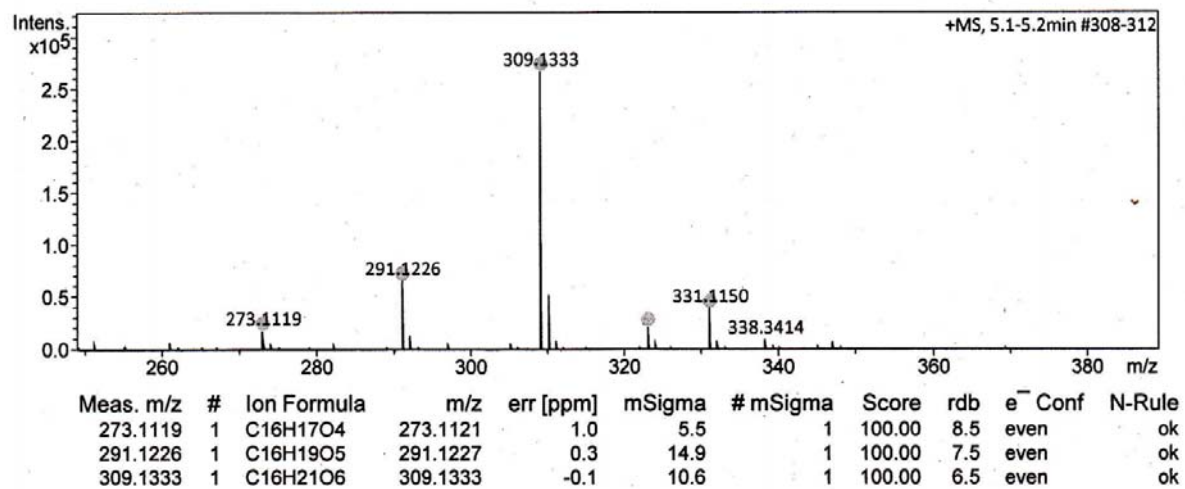

S26. HRESIMS spectrum of compound 7.

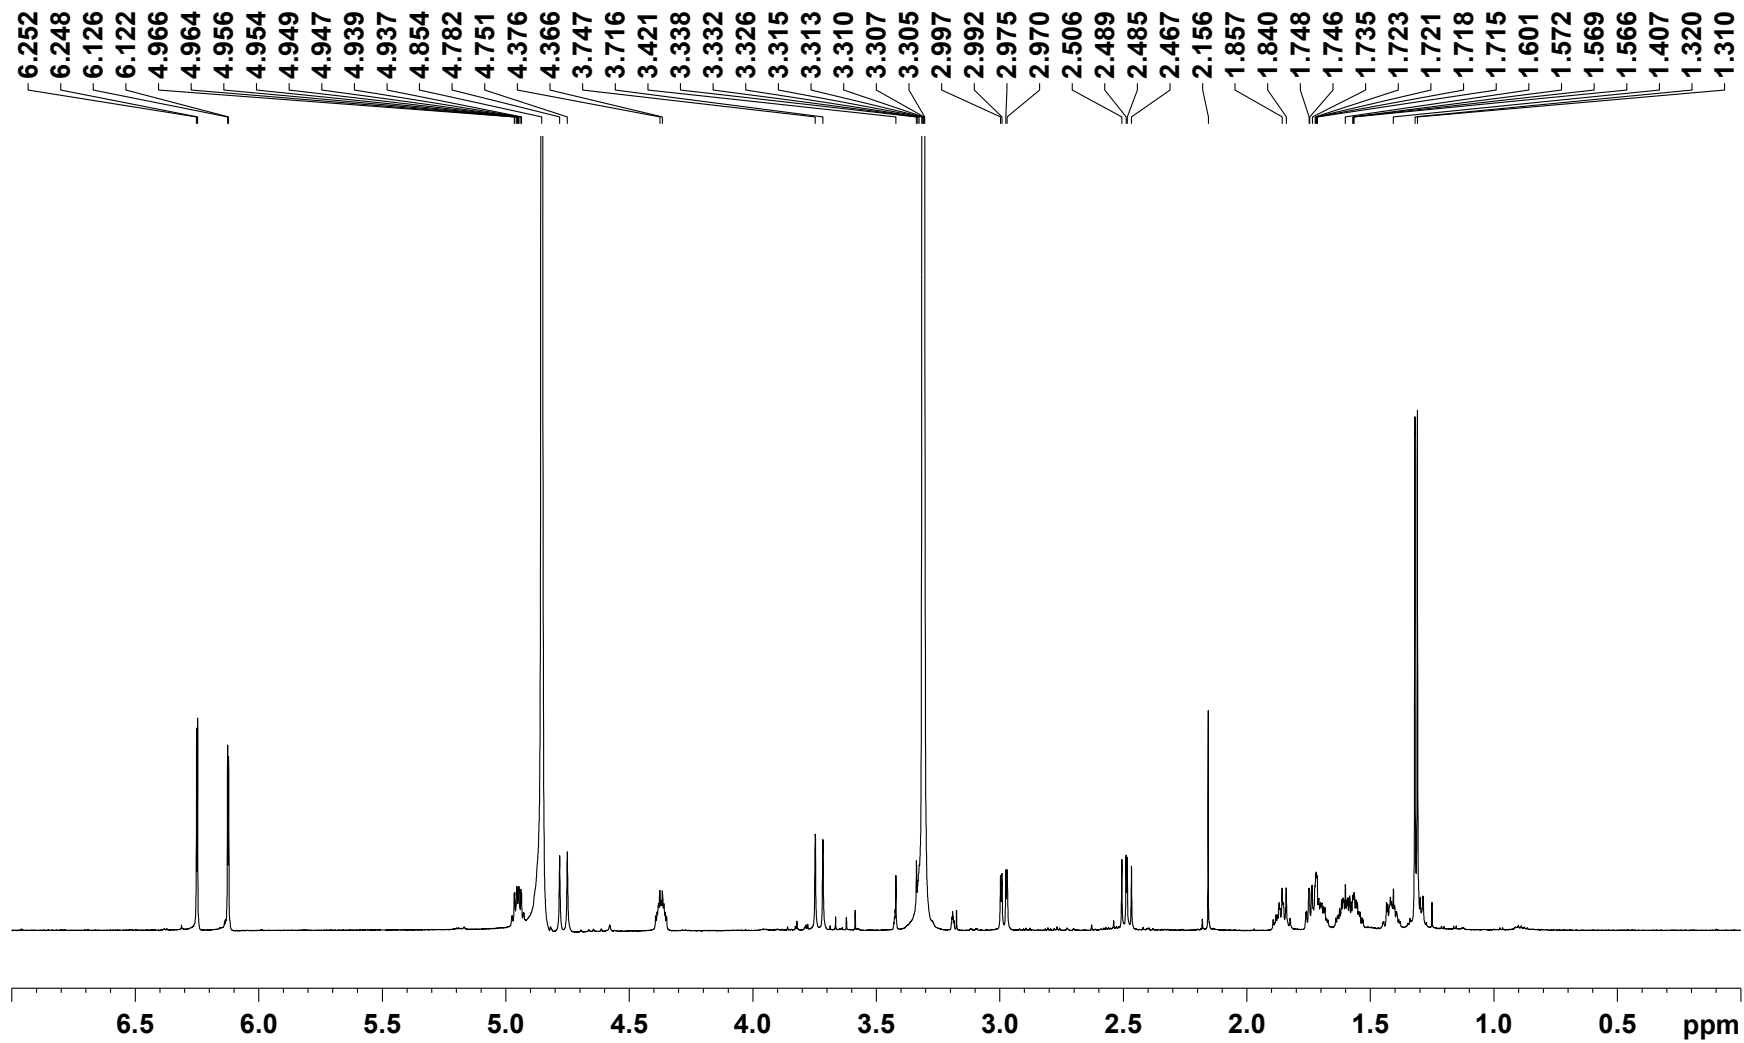

S27.  $^1\text{H}$  NMR (600 MHz,  $\text{CD}_3\text{OD}$ ) spectrum of compound 7.

Tal 80 ES 3-4-B

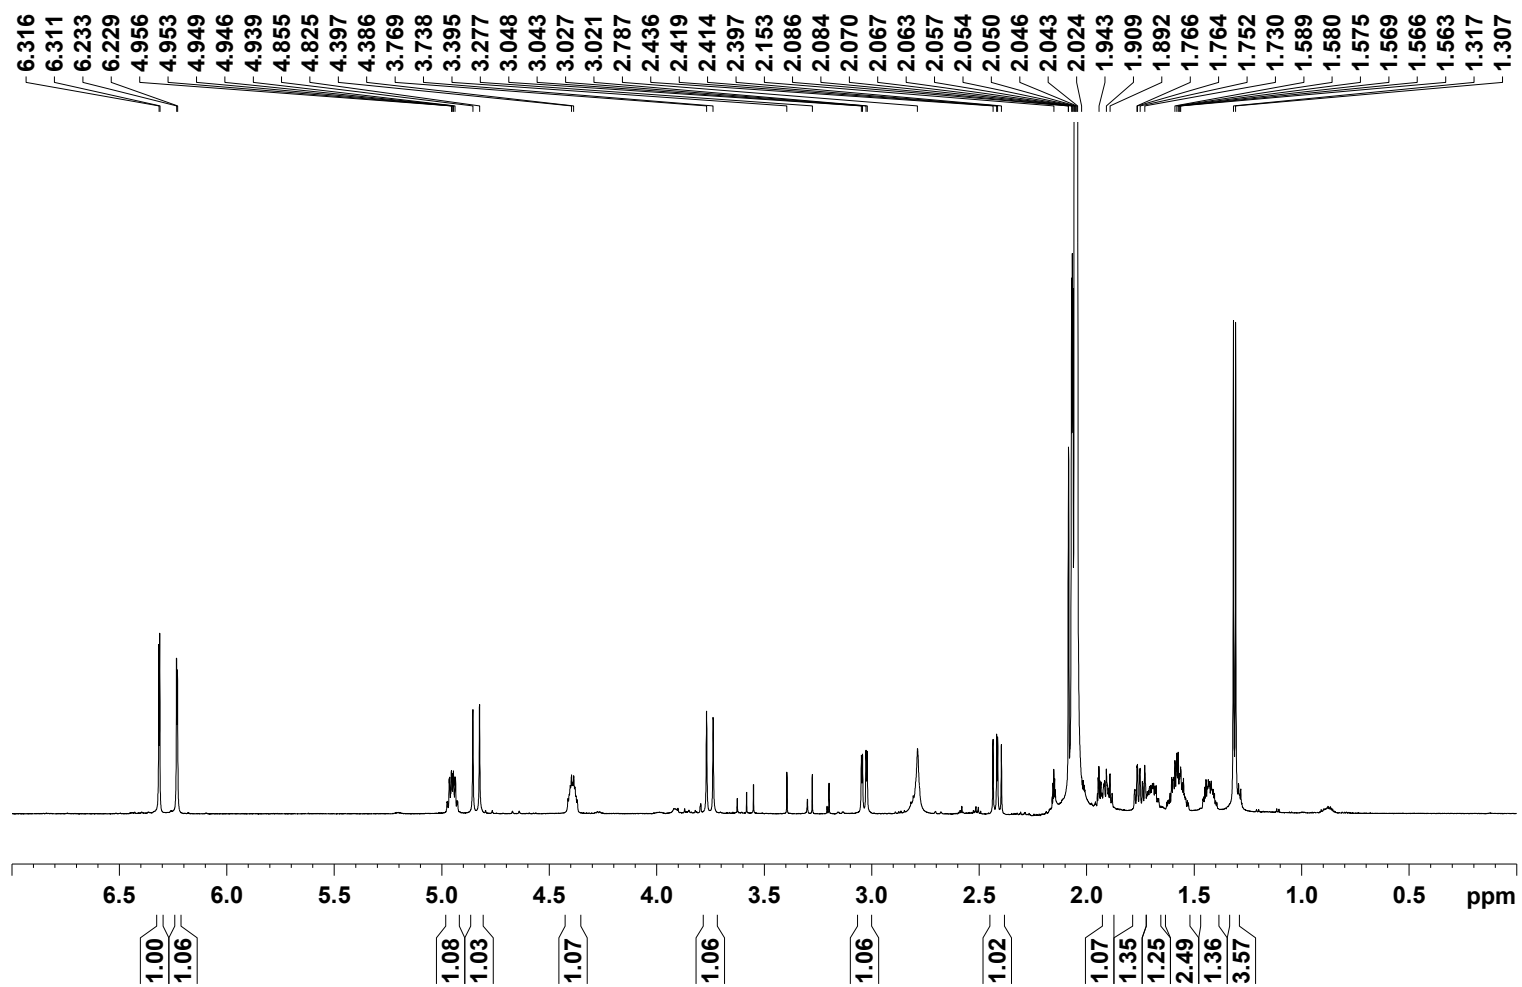

S28. <sup>1</sup>H NMR (600 MHz, CD<sub>3</sub>COCD<sub>3</sub>) spectrum of compound 7.

Tal 80 ES 3-4-B

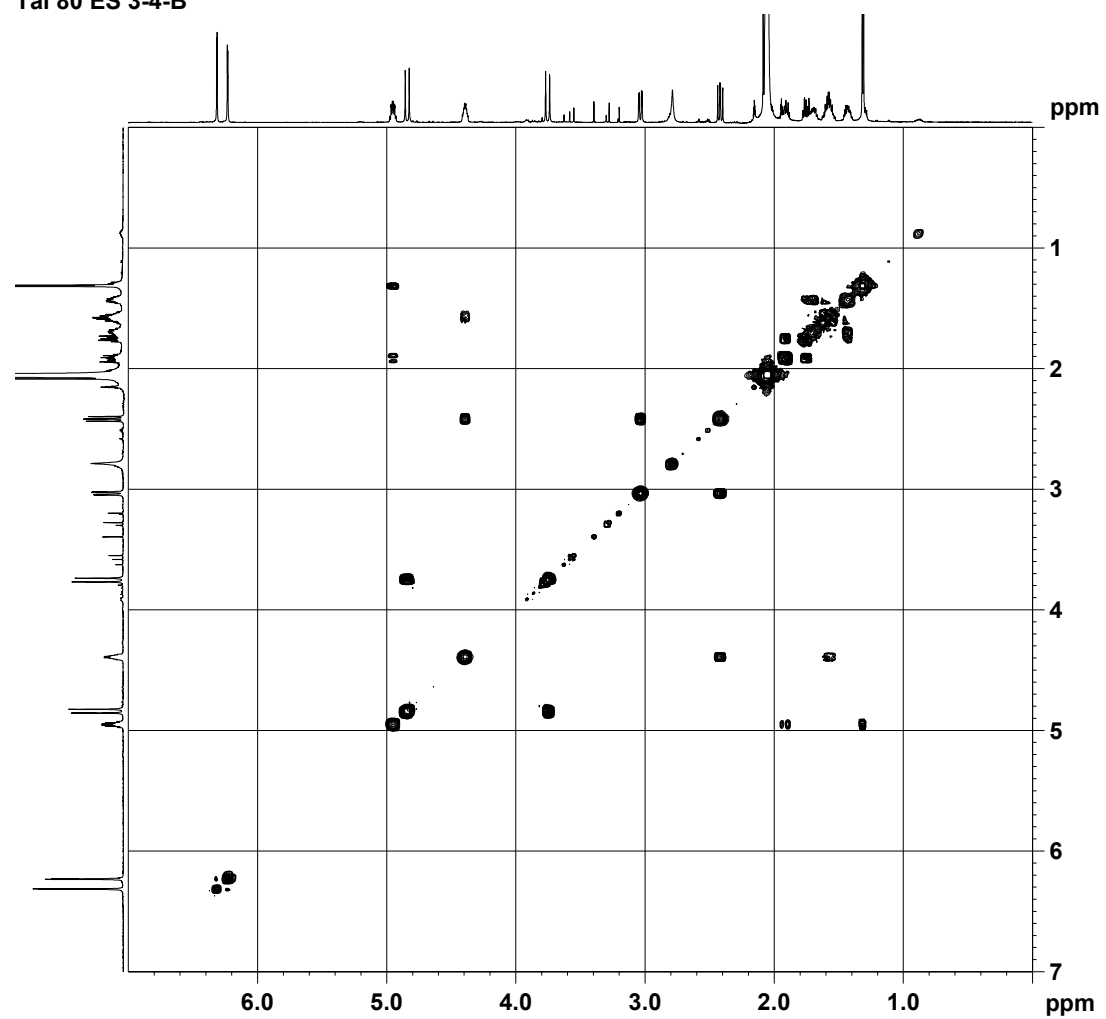

S29.  $^1\text{H}$ - $^1\text{H}$  COSY (600 MHz,  $\text{CD}_3\text{COCD}_3$ ) spectrum of compound 7.

Tal 80 ES 3-4-B

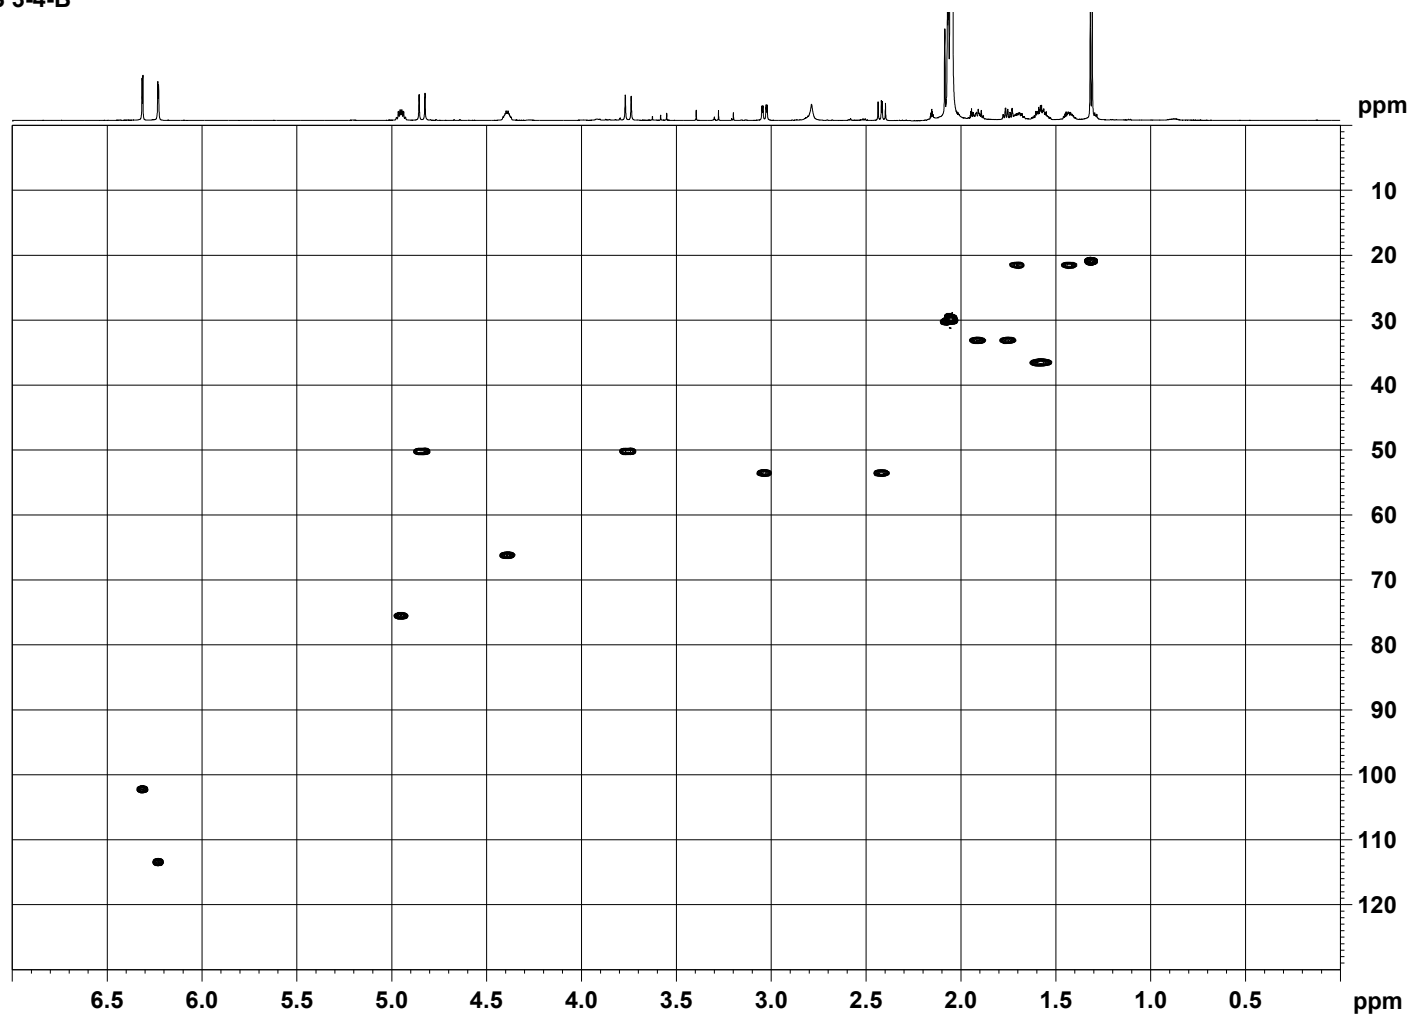

S30. HSQC (600 and 150 MHz,  $\text{CD}_3\text{COCD}_3$ ) spectrum of compound 7.

Tal 80 ES 3-4-B

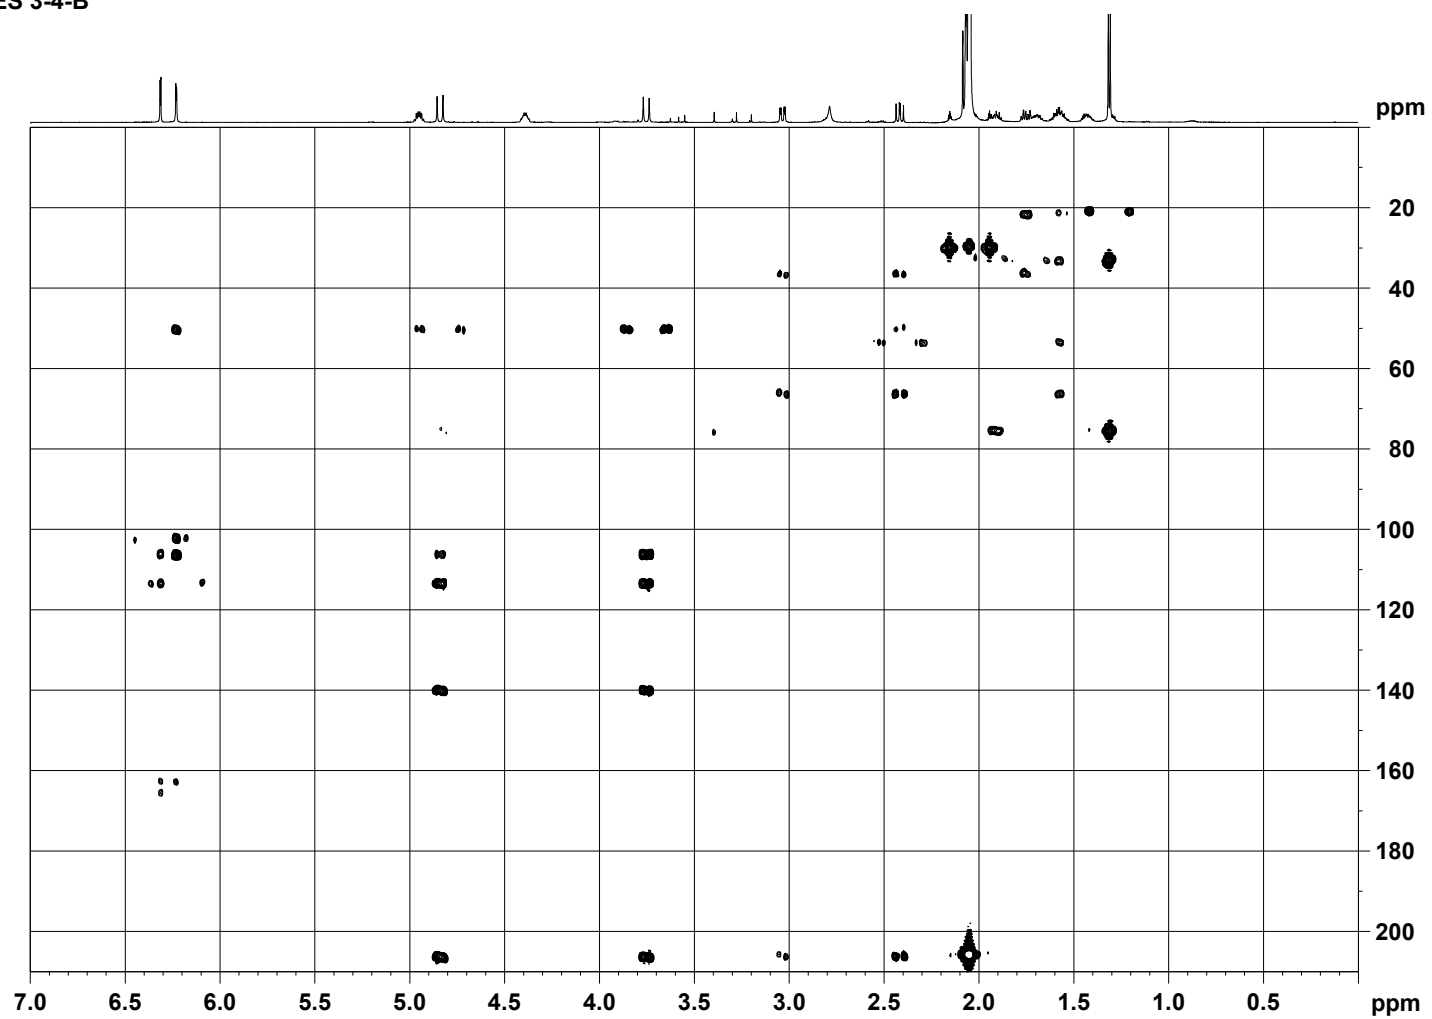

S31. HMBC (600 and 150 MHz,  $\text{CD}_3\text{COCD}_3$ ) spectrum of compound 7.



Tal 80 ES 3-4-B

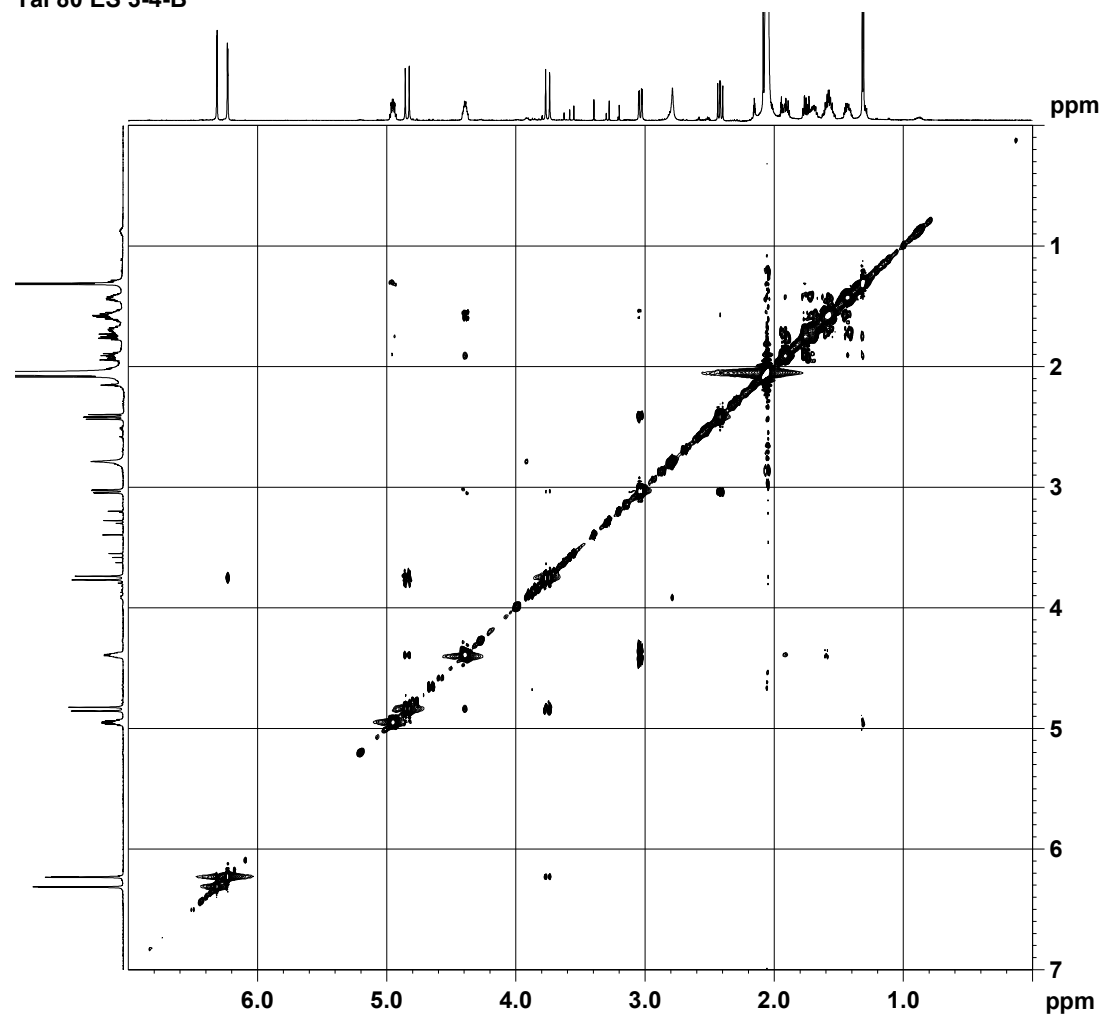

S32. ROESY (600 MHz, CD<sub>3</sub>COCD<sub>3</sub>) spectrum of compound 7.

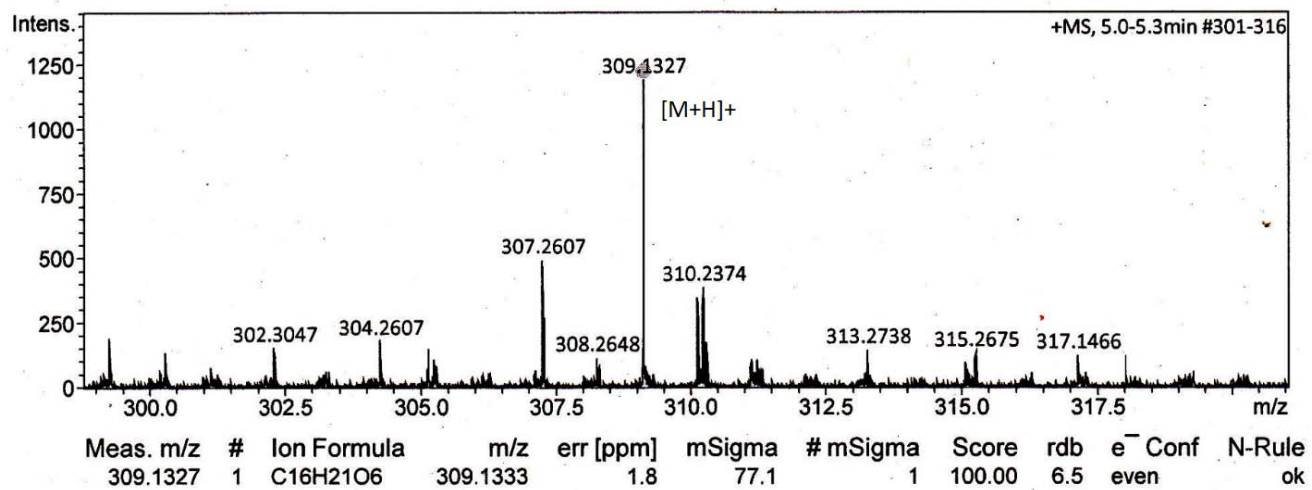

S33. HRESIMS spectrum of compound 8.

Tal 80 ES 4-5-6

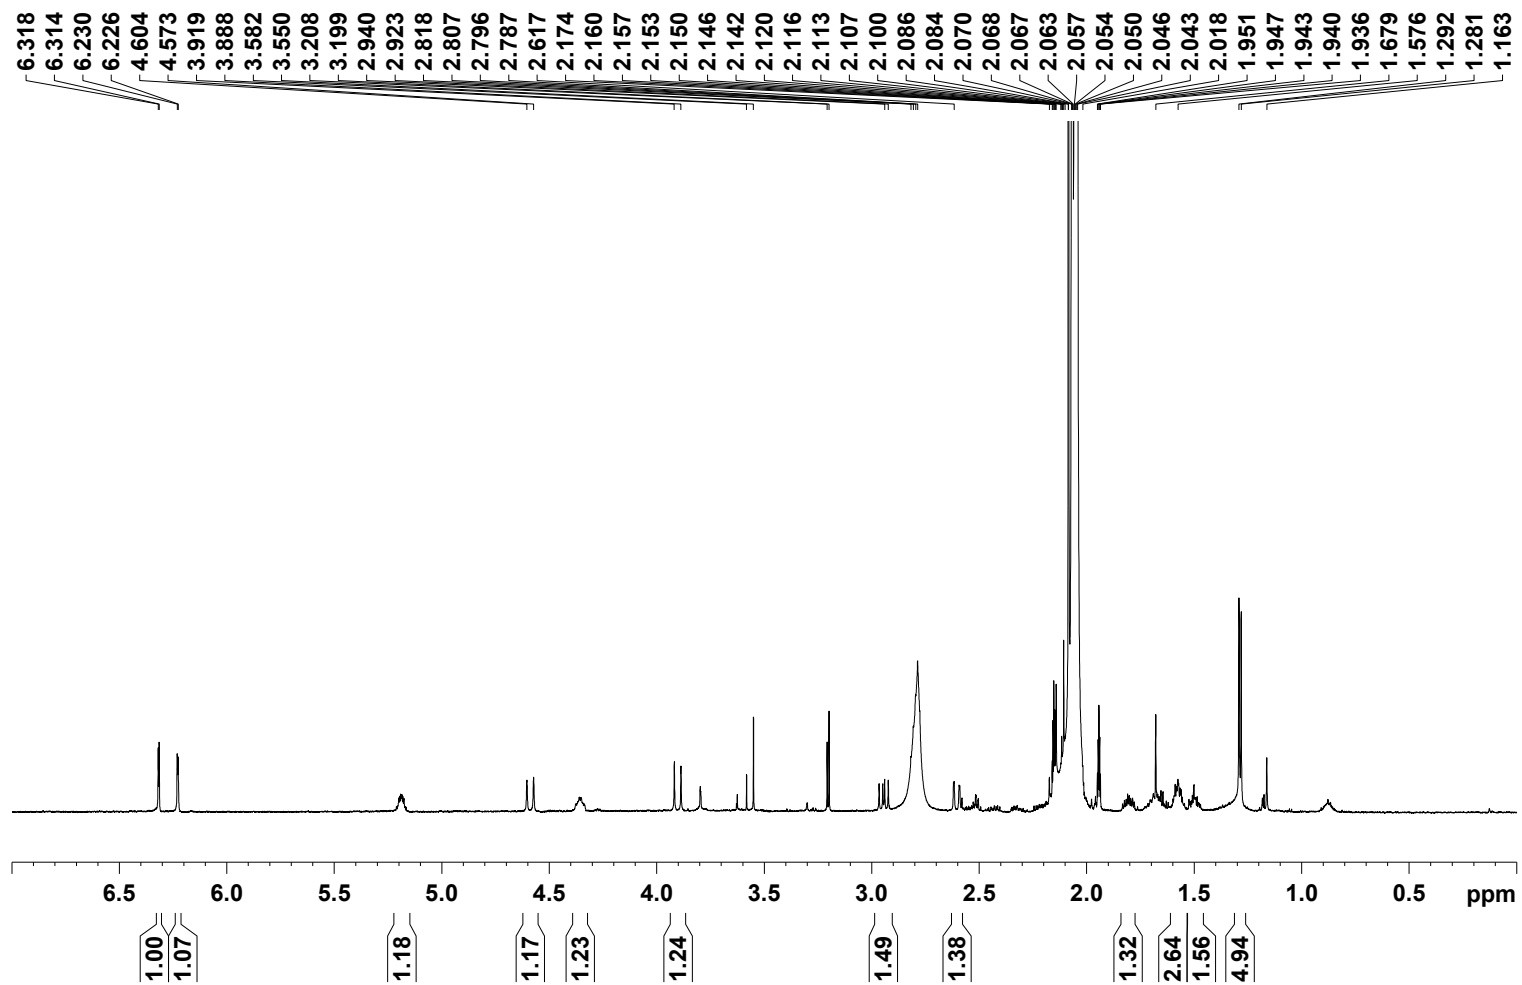

S34. <sup>1</sup>H NMR (600 MHz, CD<sub>3</sub>COCD<sub>3</sub>) spectrum of compound 8.

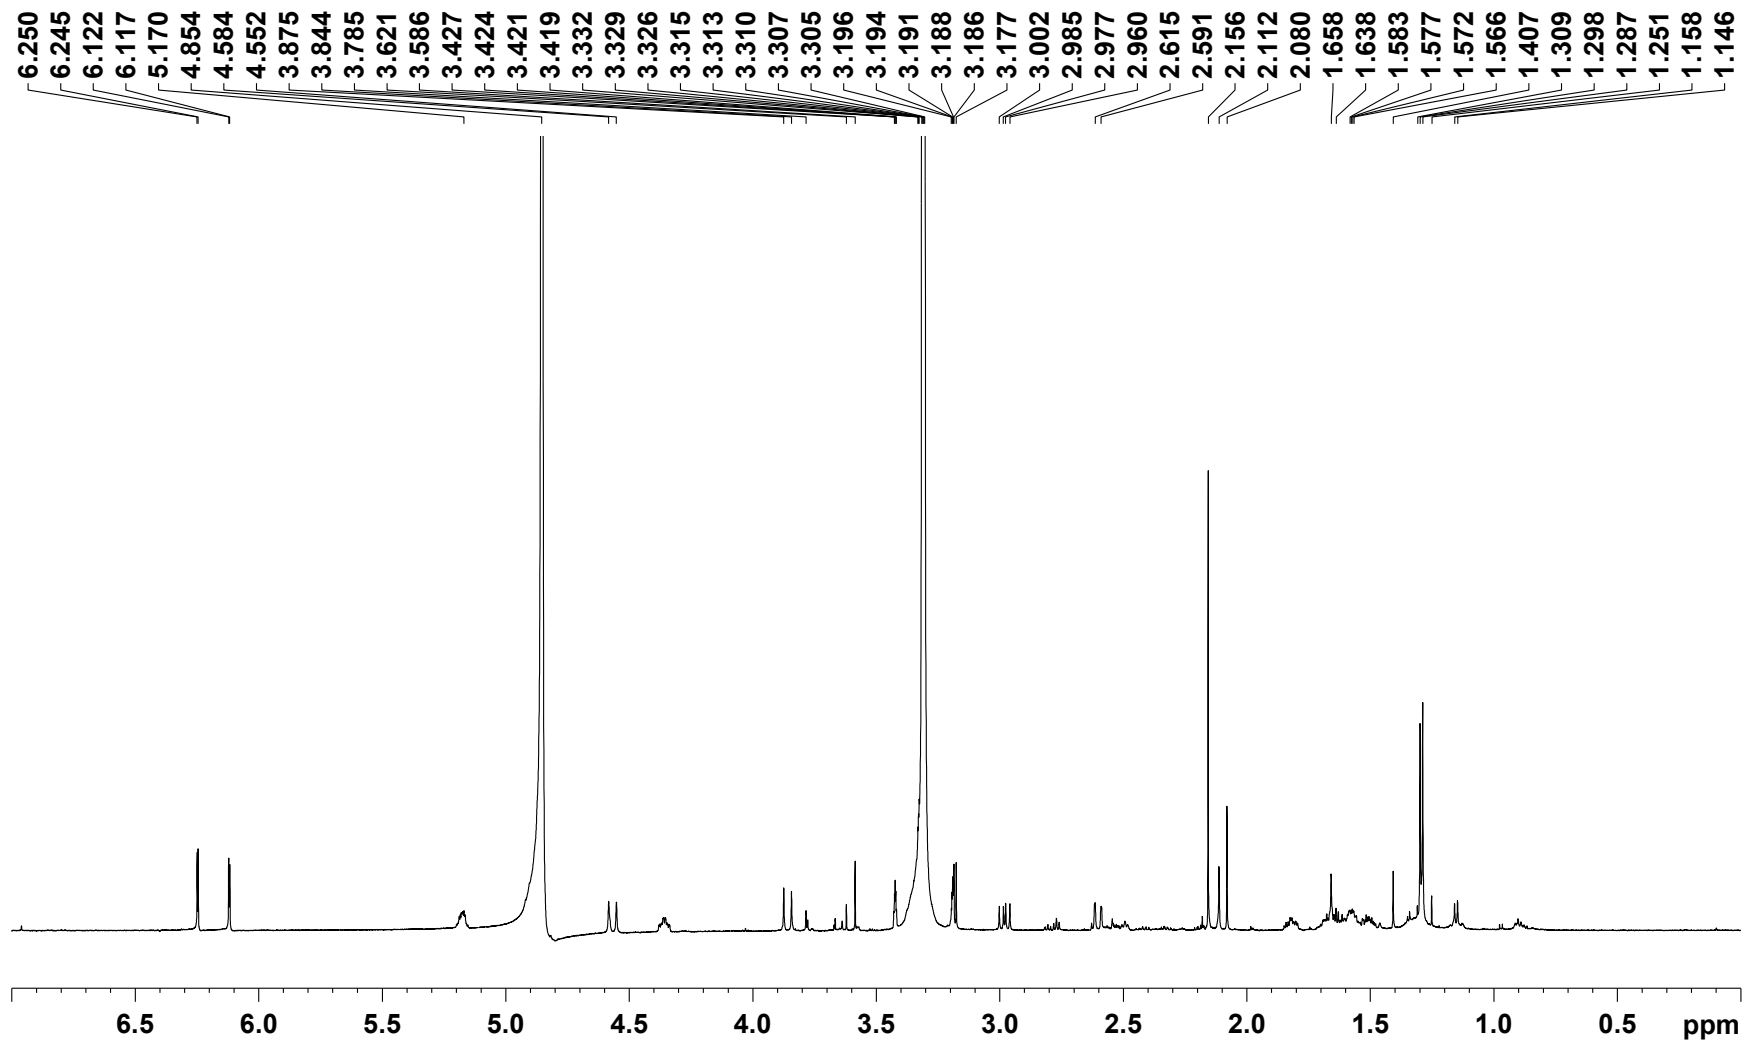

S35.  $^1\text{H}$  NMR (600 MHz,  $\text{CD}_3\text{OD}$ ) spectrum of compound 8.

Tal 80 ES 4-5-6

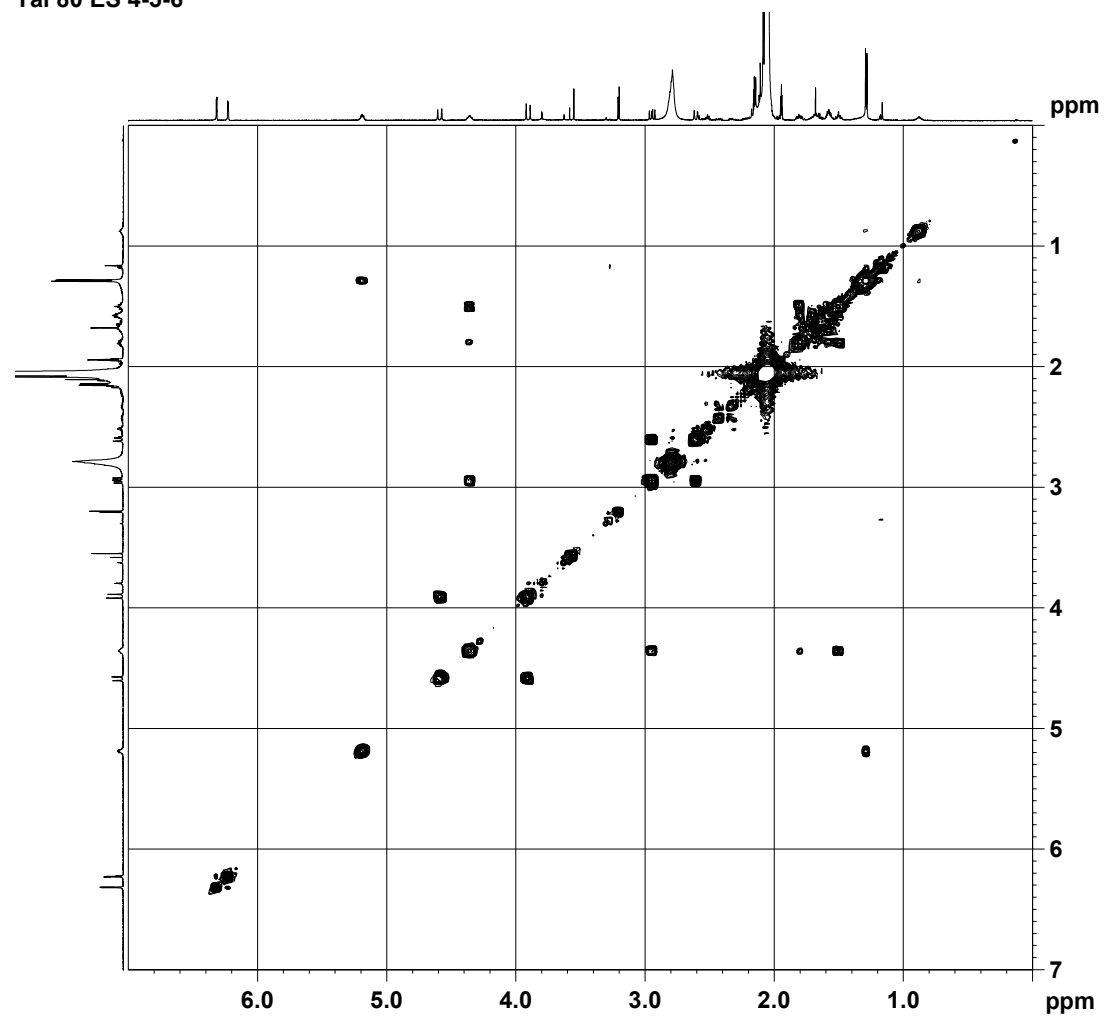

S36.  $^1\text{H}$ - $^1\text{H}$  COSY (600 MHz,  $\text{CD}_3\text{COCD}_3$ ) spectrum of compound 8.

Tal 80 ES 4-5-6

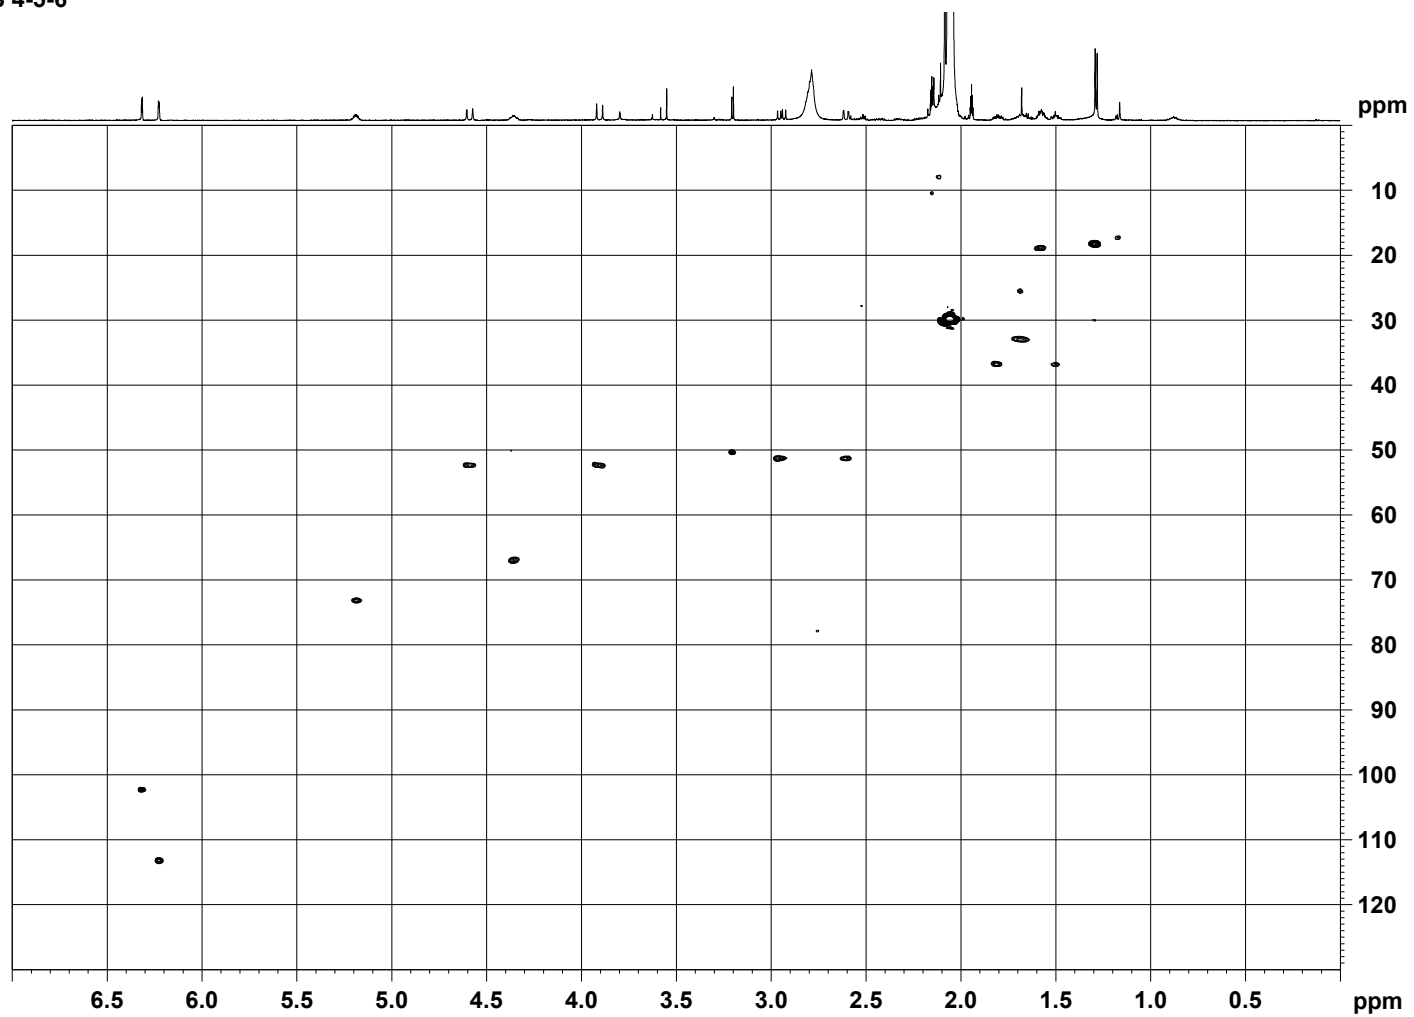

S37. HSQC (600 and 150 MHz,  $\text{CD}_3\text{COCD}_3$ ) spectrum of compound 8.

Tal 80 ES 4-5-6

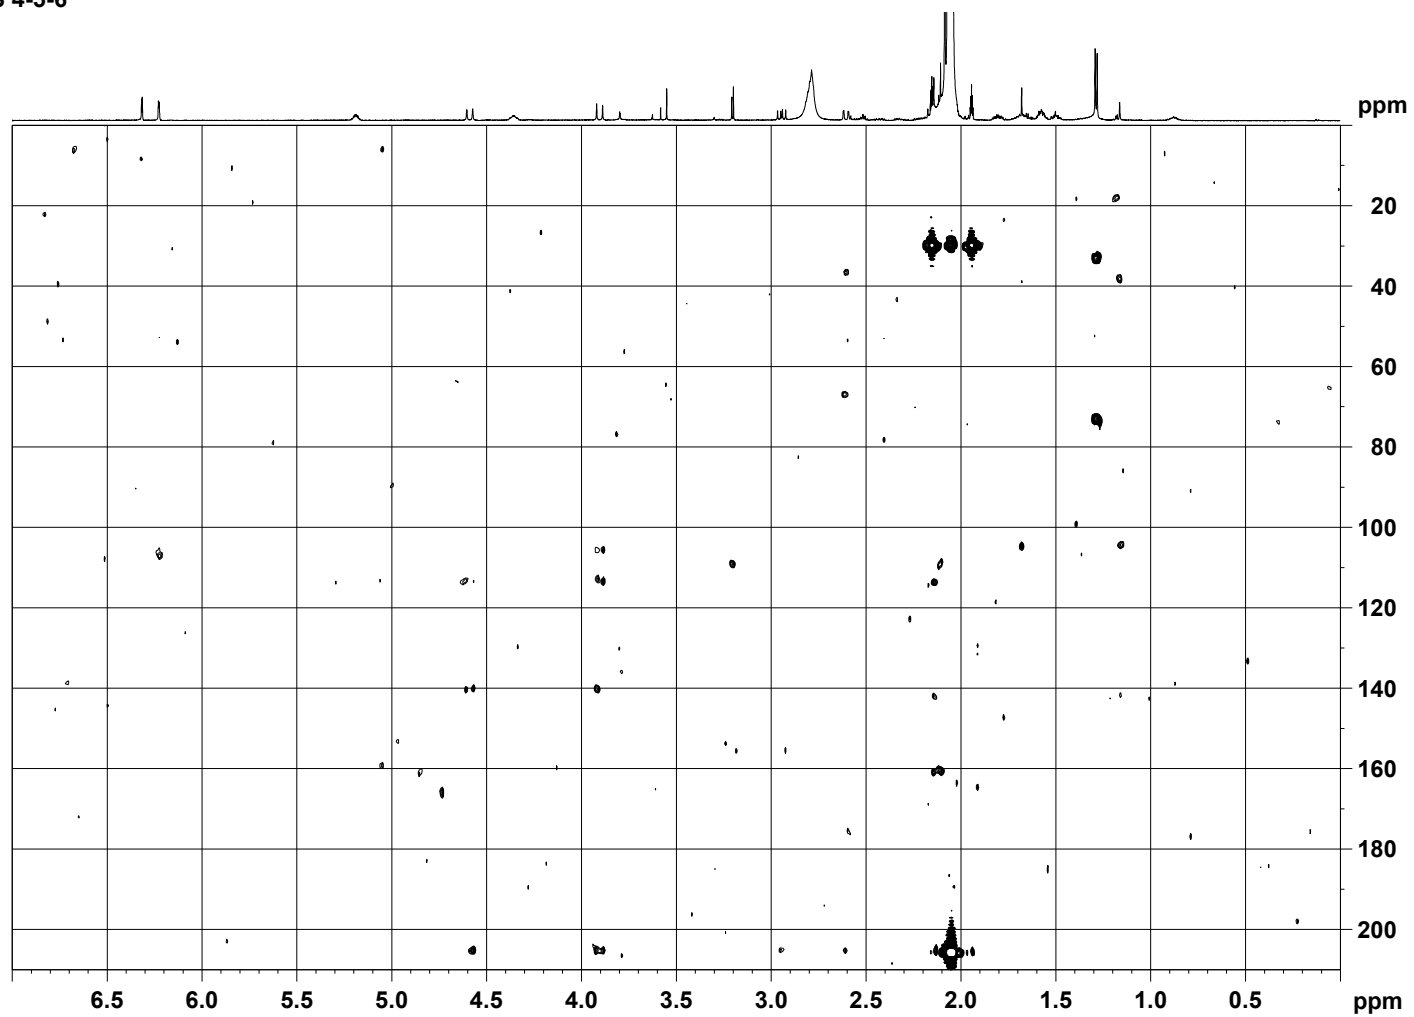

S38. HMBC (600 and 150 MHz,  $\text{CD}_3\text{COCD}_3$ ) spectrum of compound 8.

Tal 80 ES 4-5-6

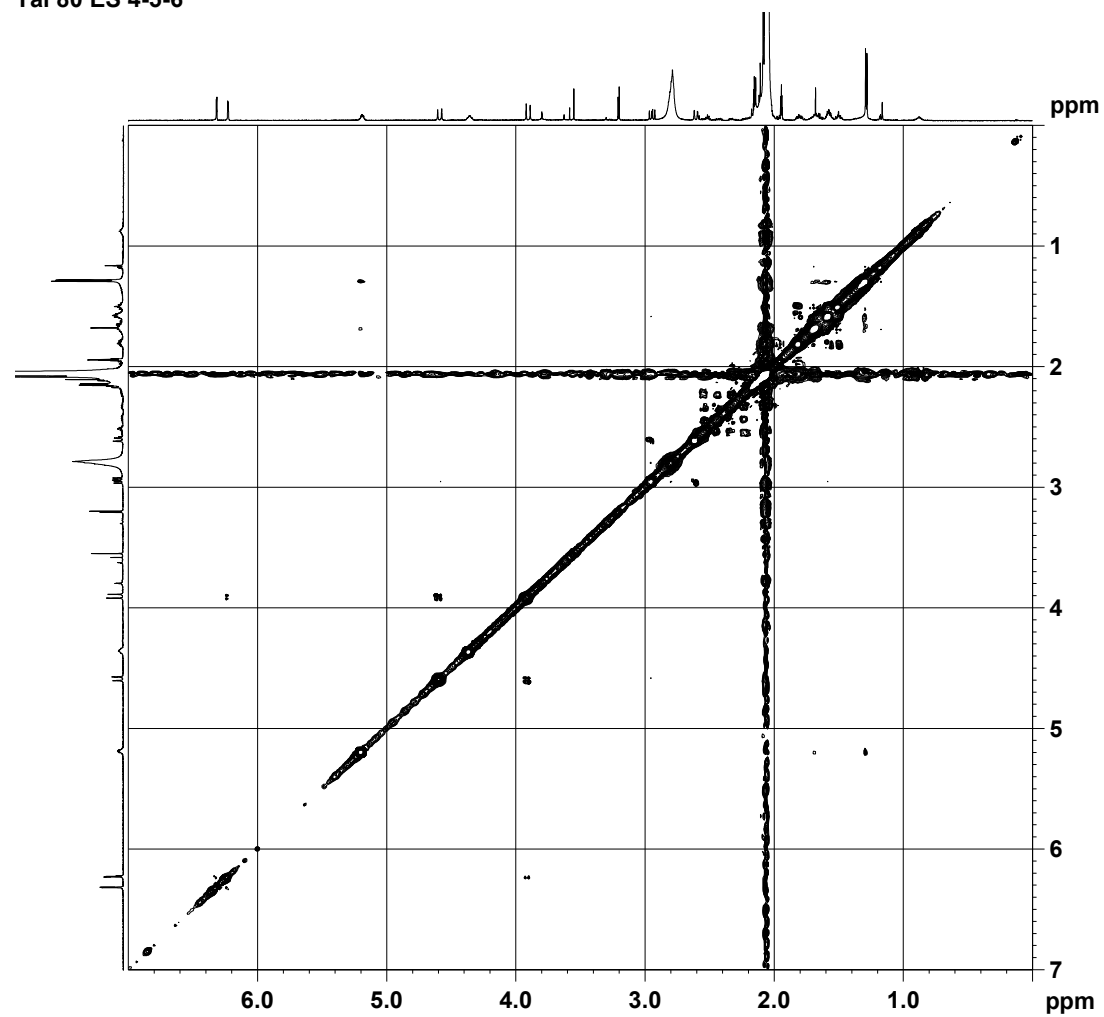

S39. ROESY (600 MHz, CD<sub>3</sub>COCD<sub>3</sub>) spectrum of compound 8.



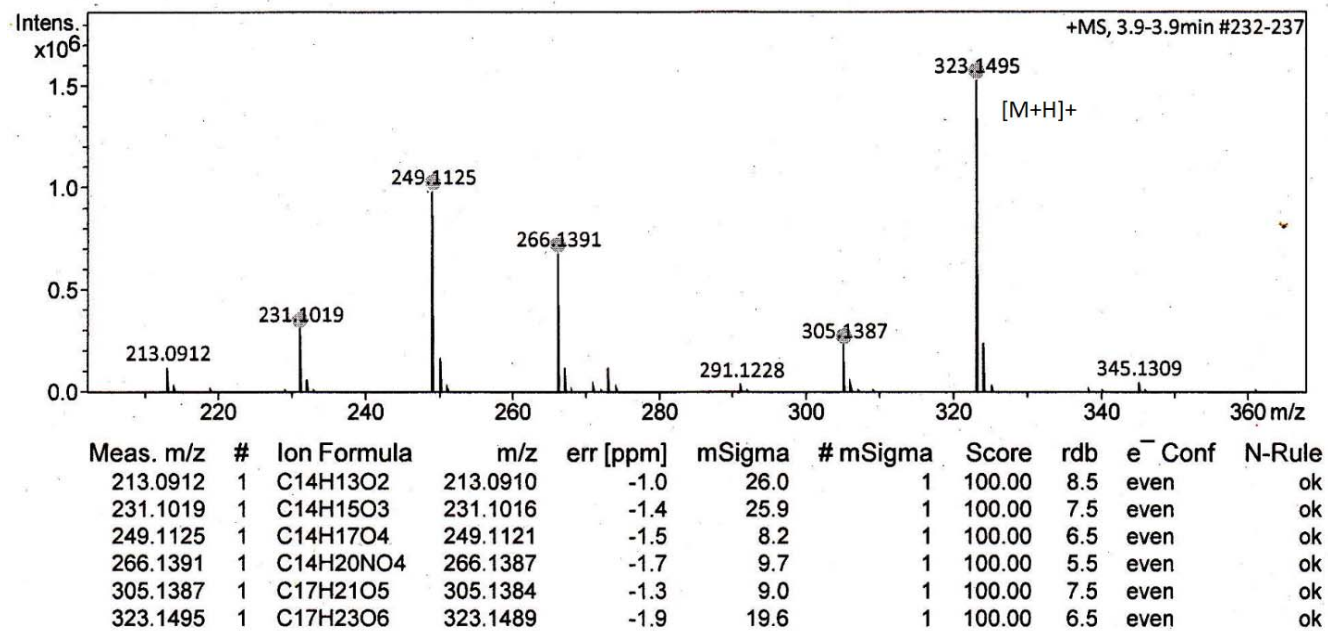

S40. HRESIMS spectrum of compound 9.

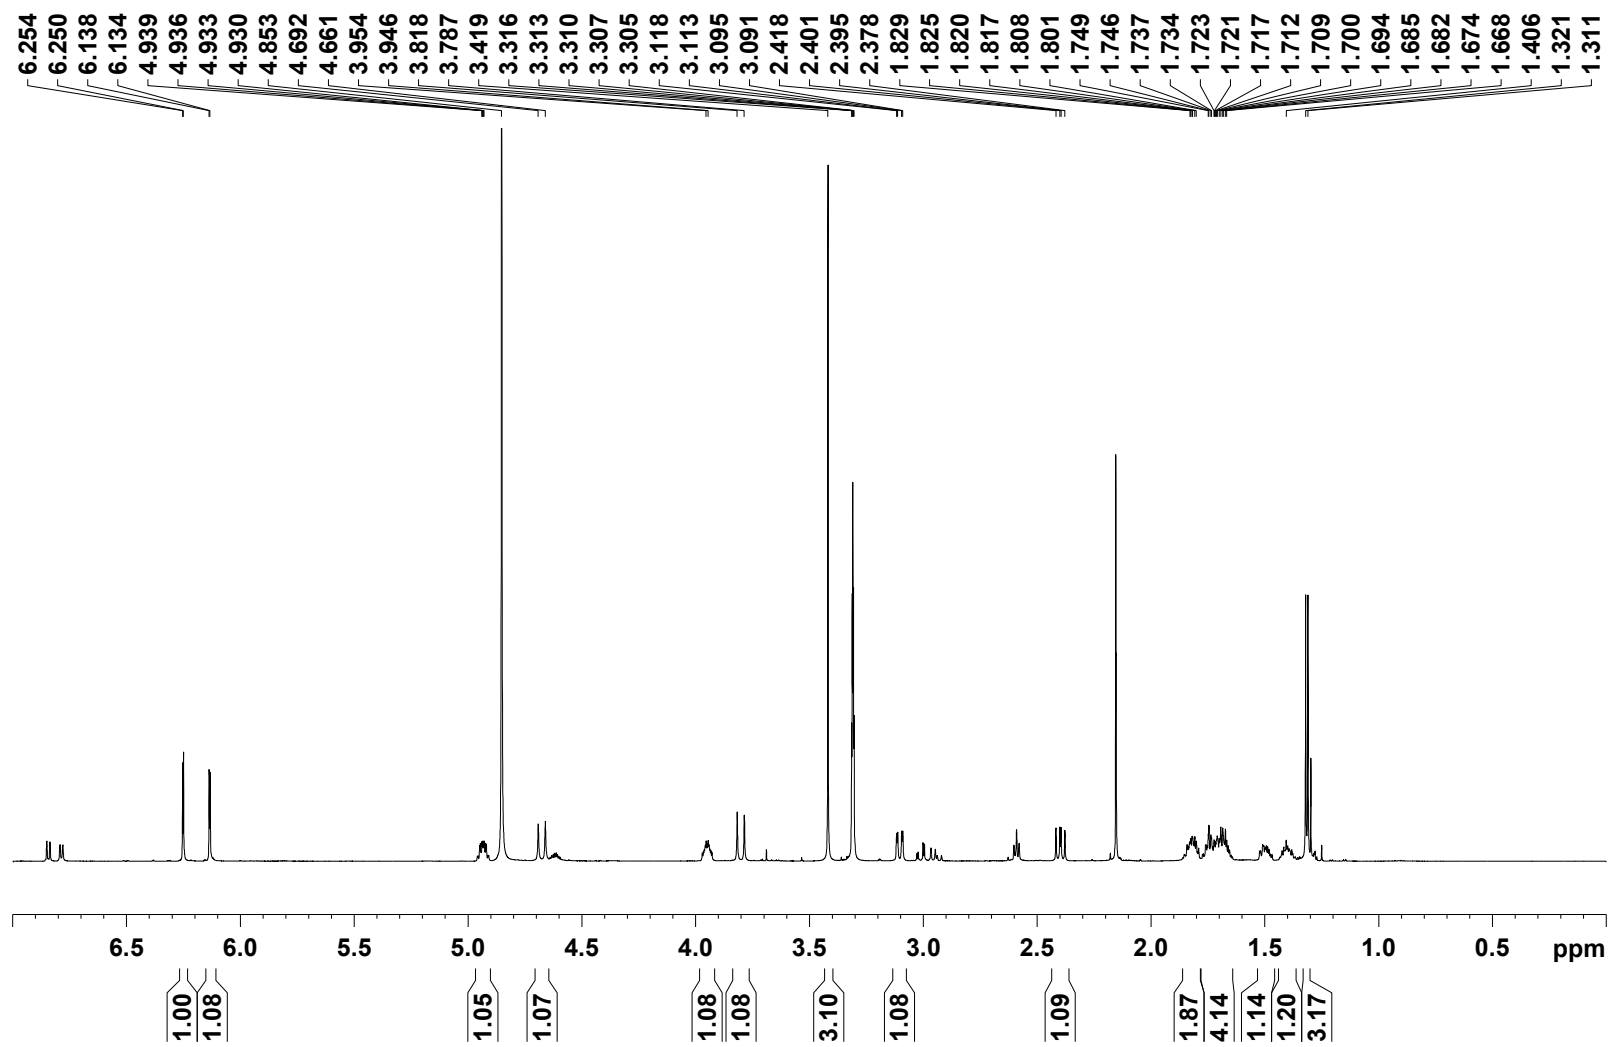

S41.  $^1\text{H}$  NMR (600 MHz,  $\text{CD}_3\text{OD}$ ) spectrum of compound 9.

L.K.A3

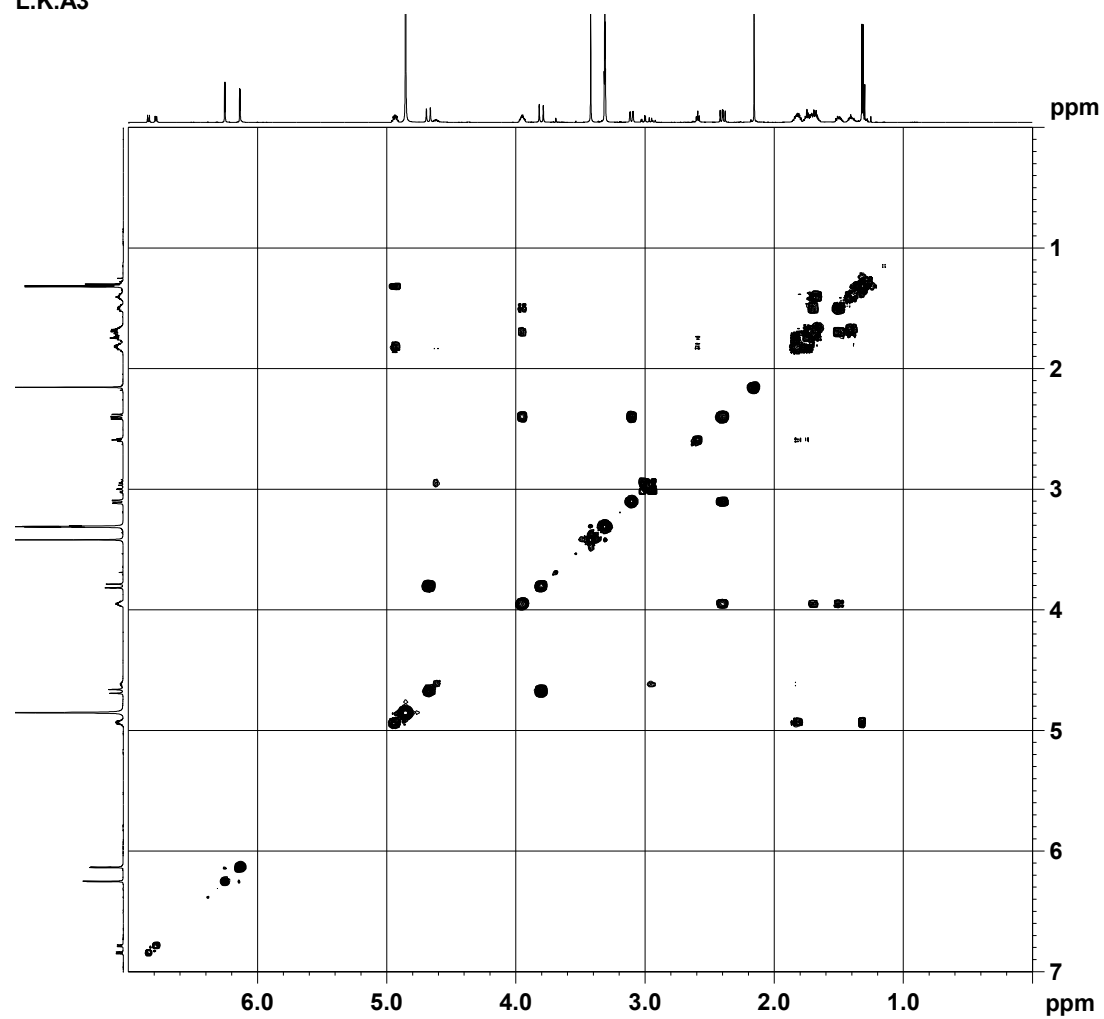

S42.  $^1\text{H}$ - $^1\text{H}$  COSY (600 MHz,  $\text{CD}_3\text{OD}$ ) spectrum of compound **9**.

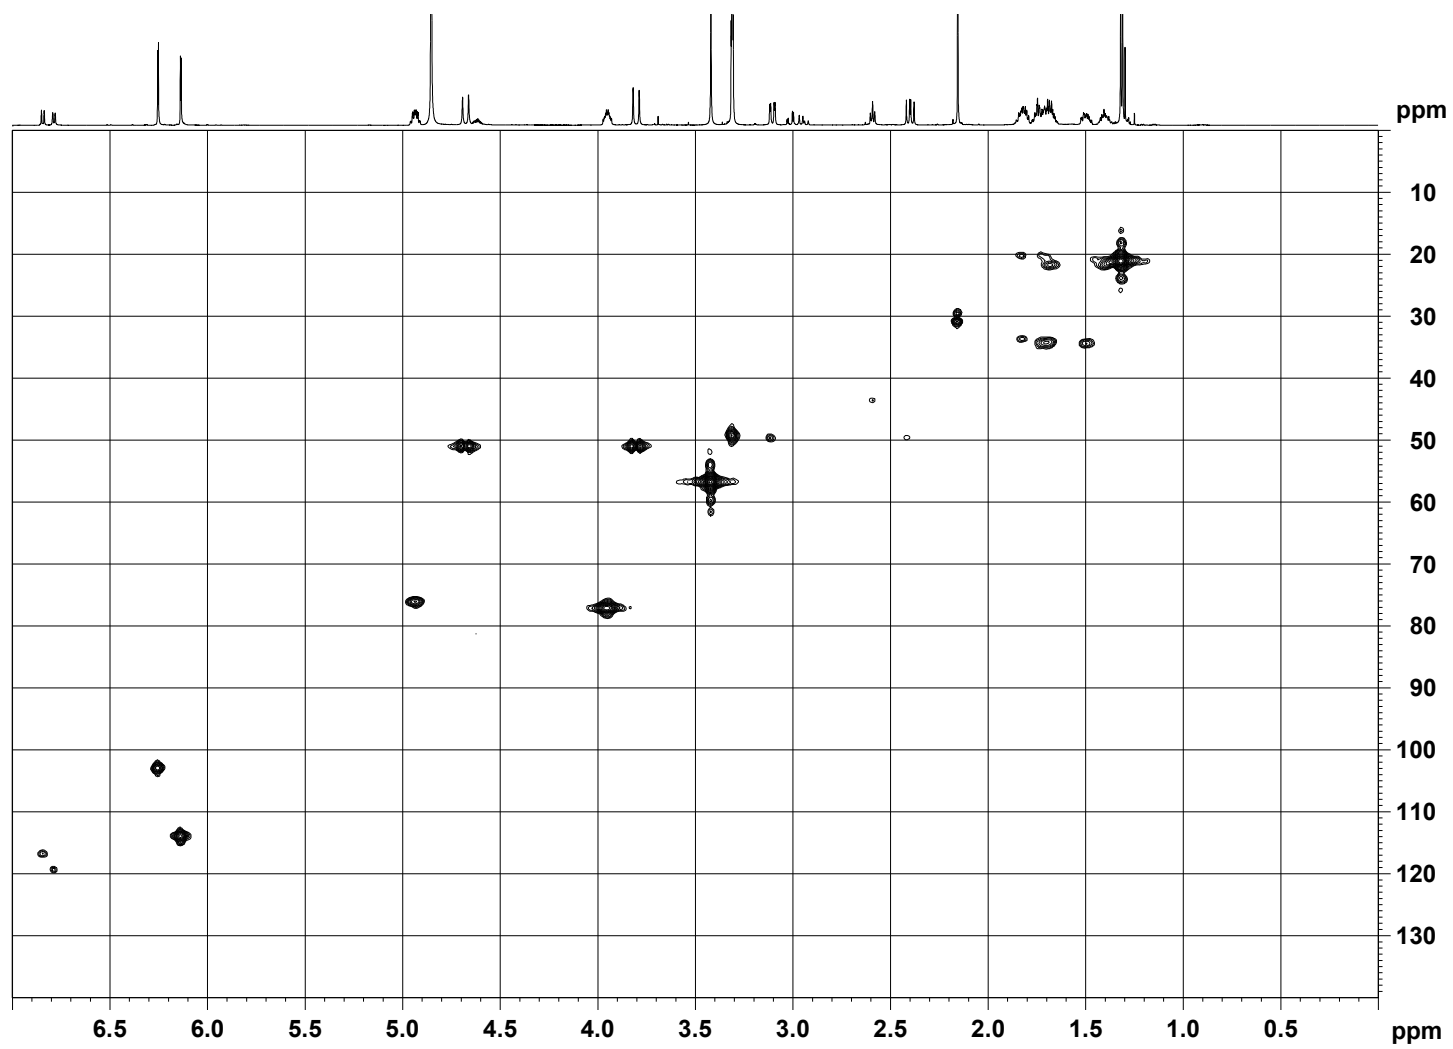

S43. HSQC (600 and 150 MHz, CD<sub>3</sub>OD) spectrum of compound 9.

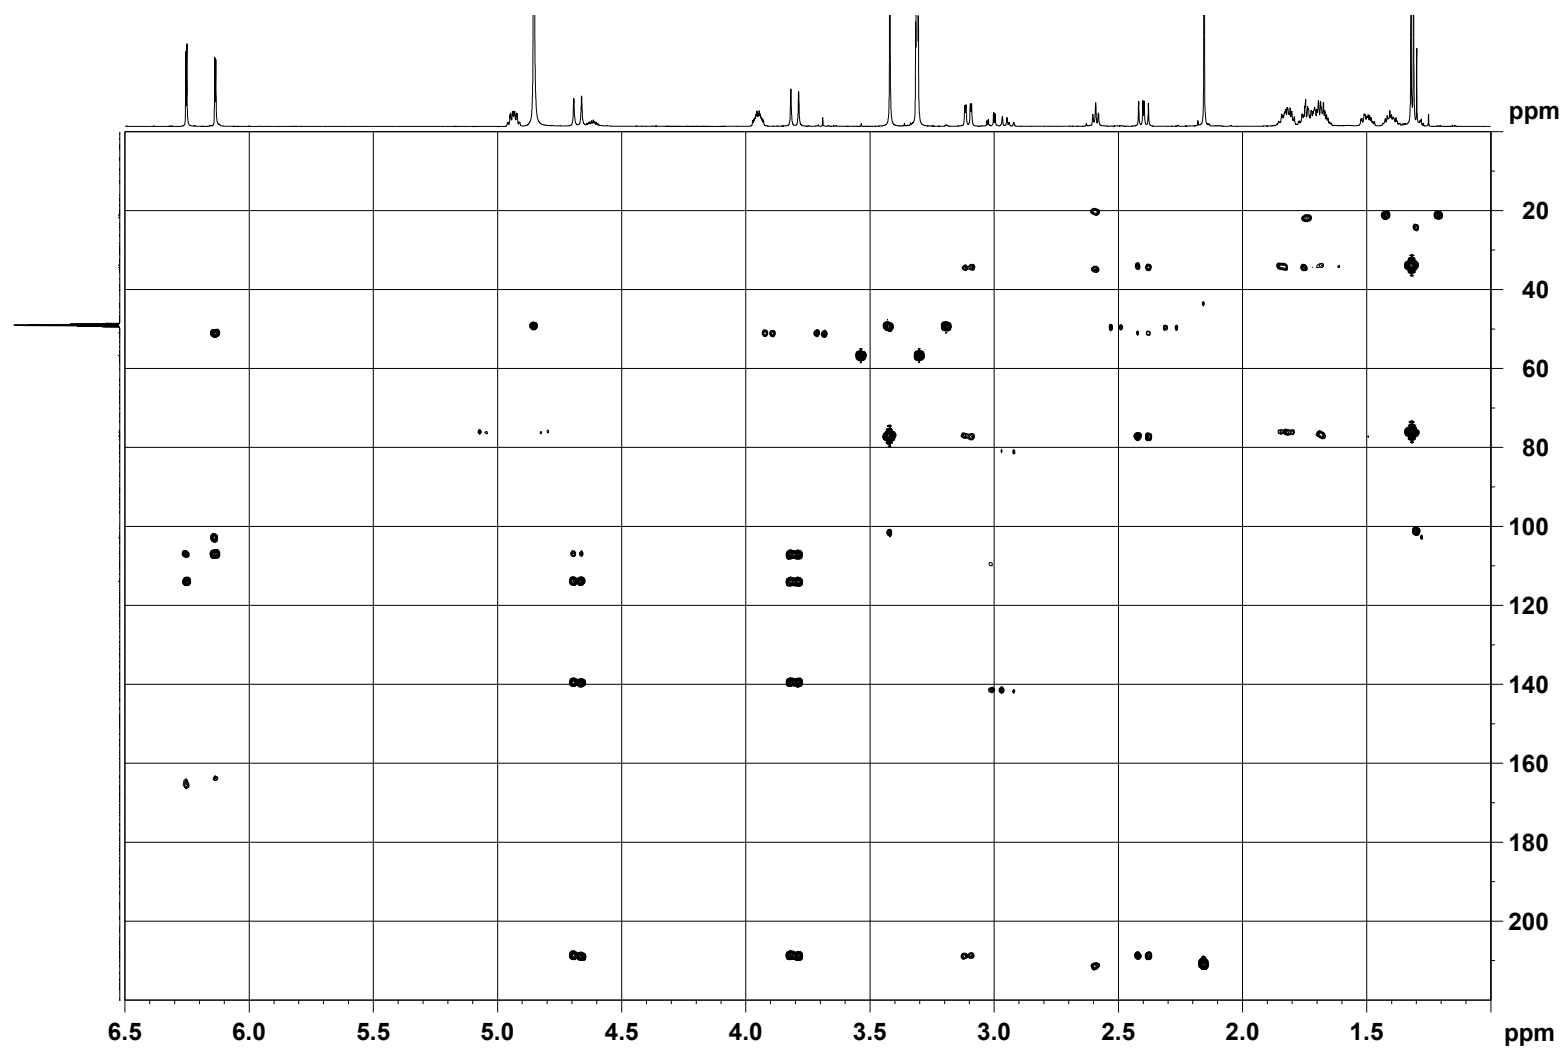

S44. HMBC (600 and 150 MHz,  $\text{CD}_3\text{OD}$ ) spectrum of compound 9.

L.K.A3

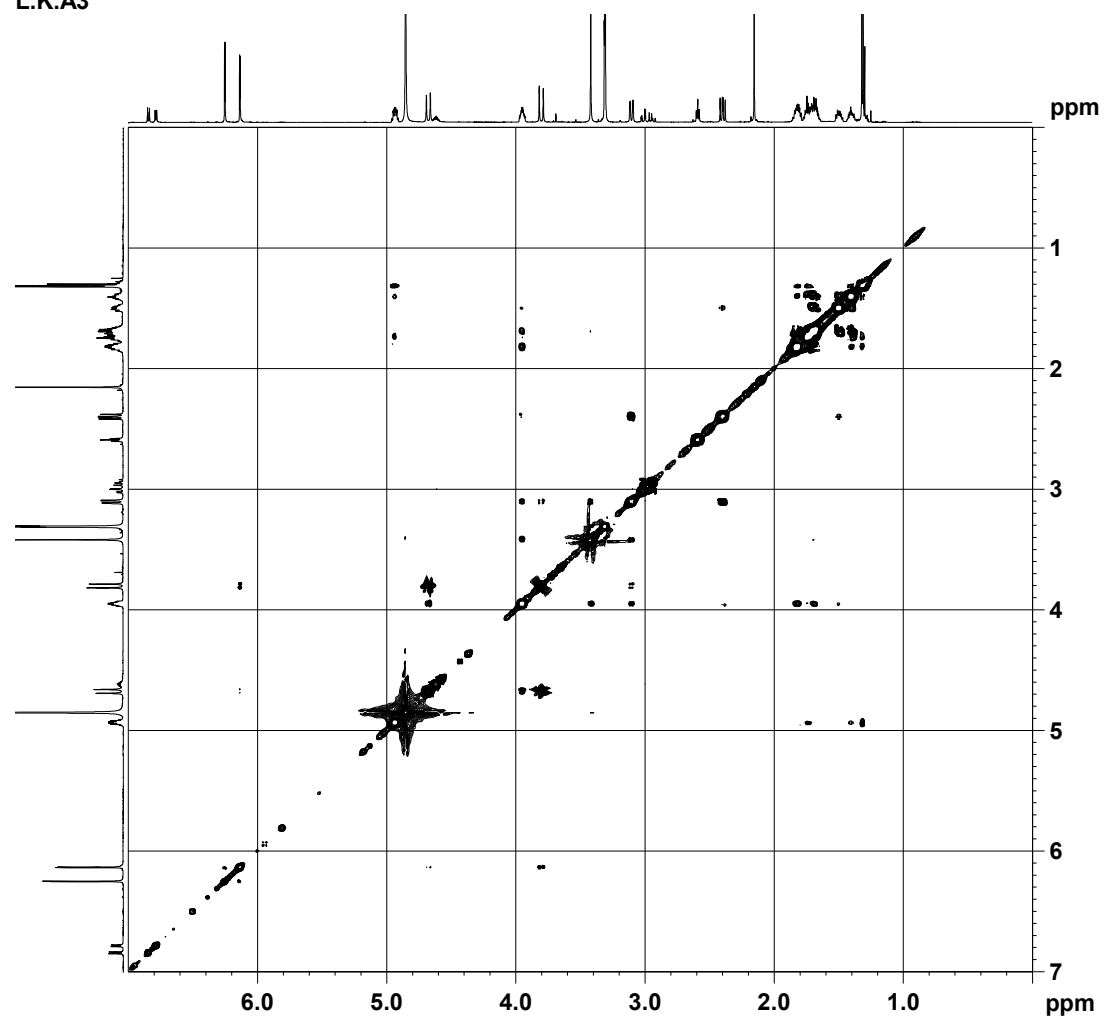

S45. ROESY (600 MHz, CD<sub>3</sub>OD) spectrum of compound 9.

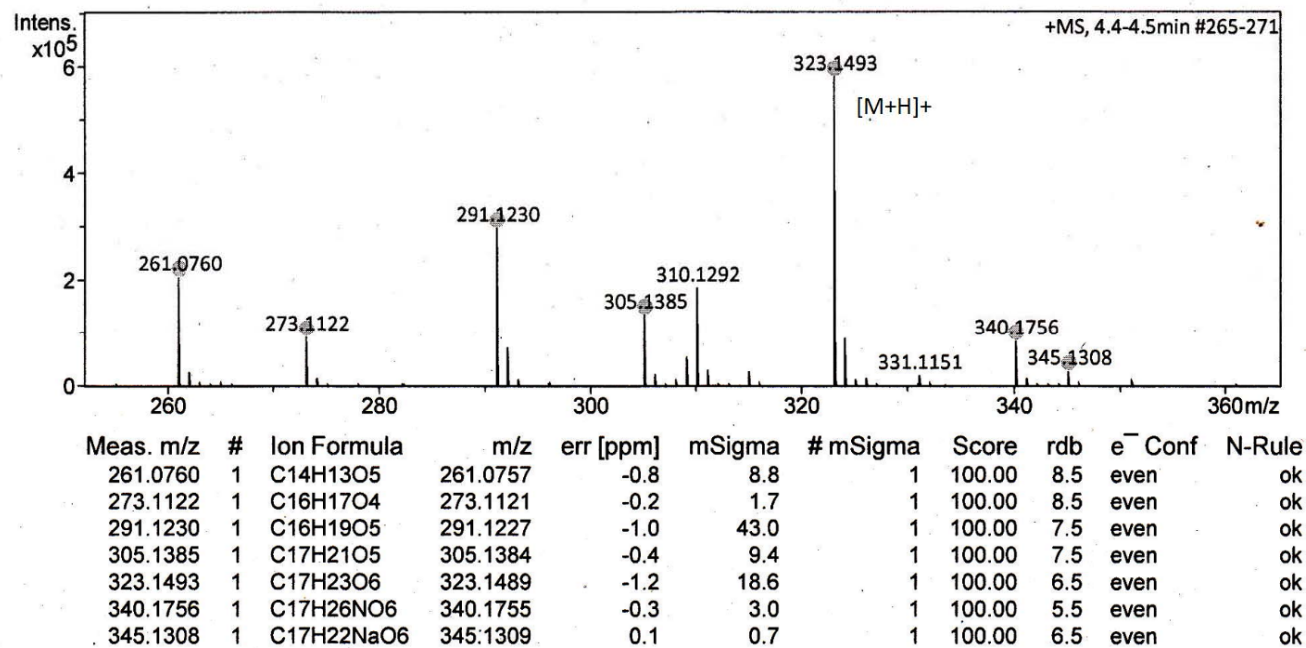

S46. HRMSIMS spectrum of compound 10.

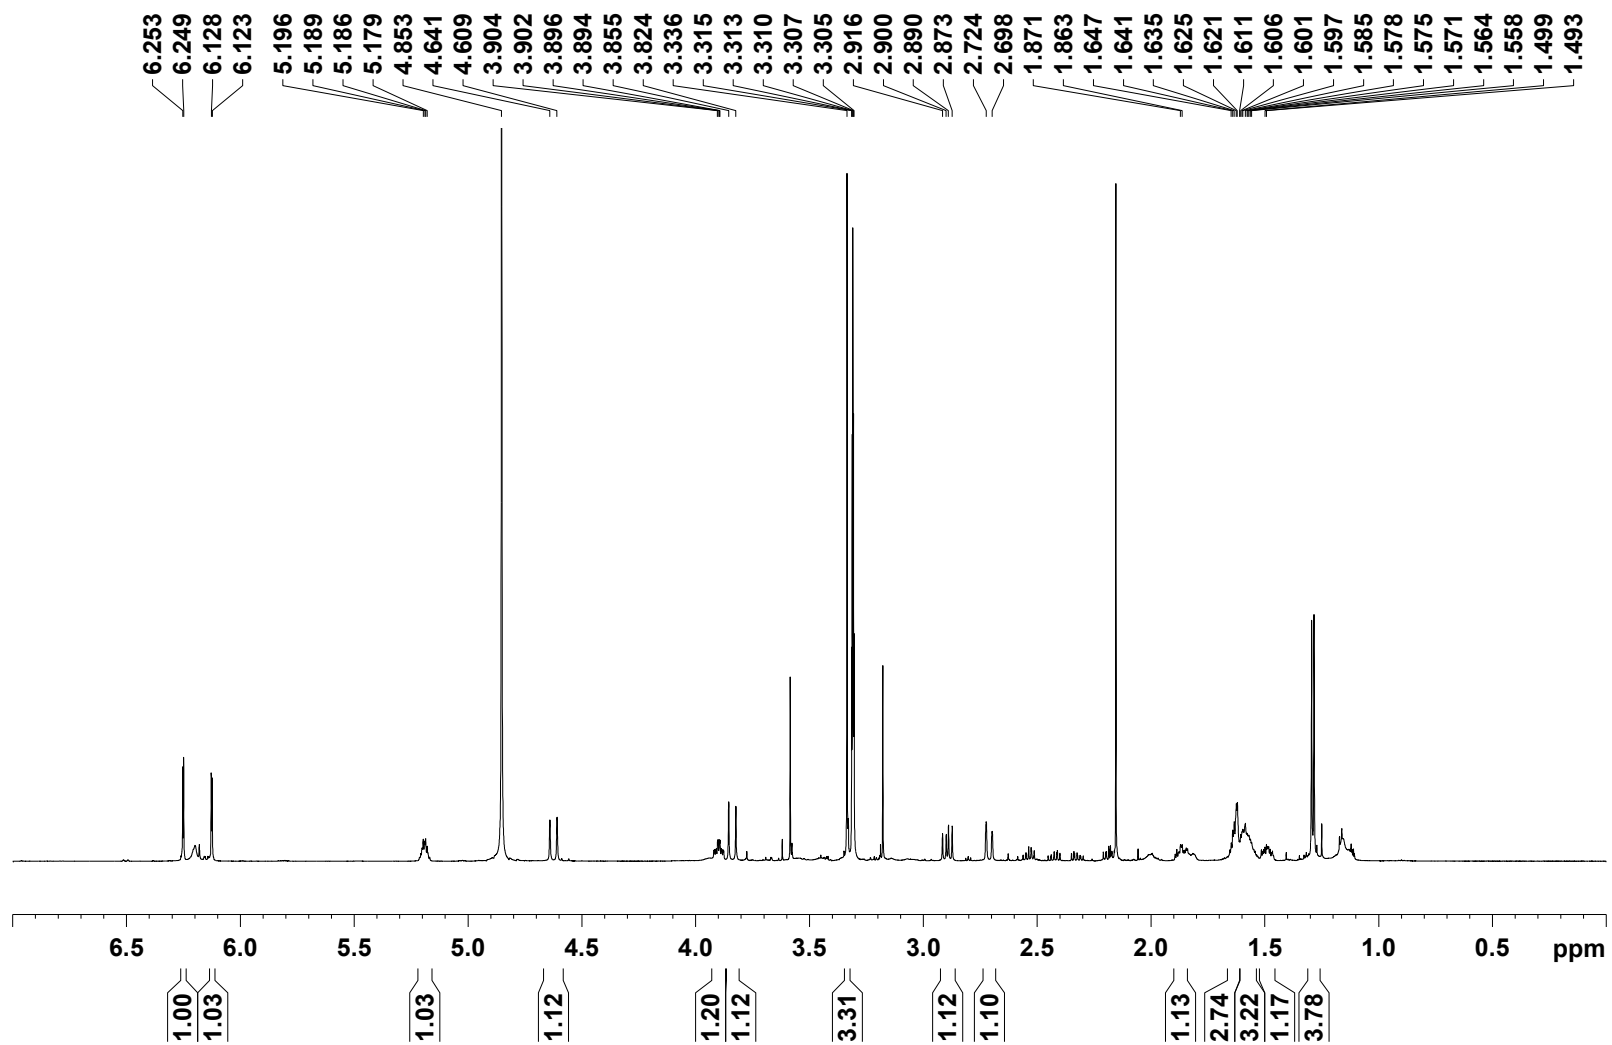

S47. <sup>1</sup>H NMR (600 MHz, CD<sub>3</sub>OD) spectrum of compound 10.





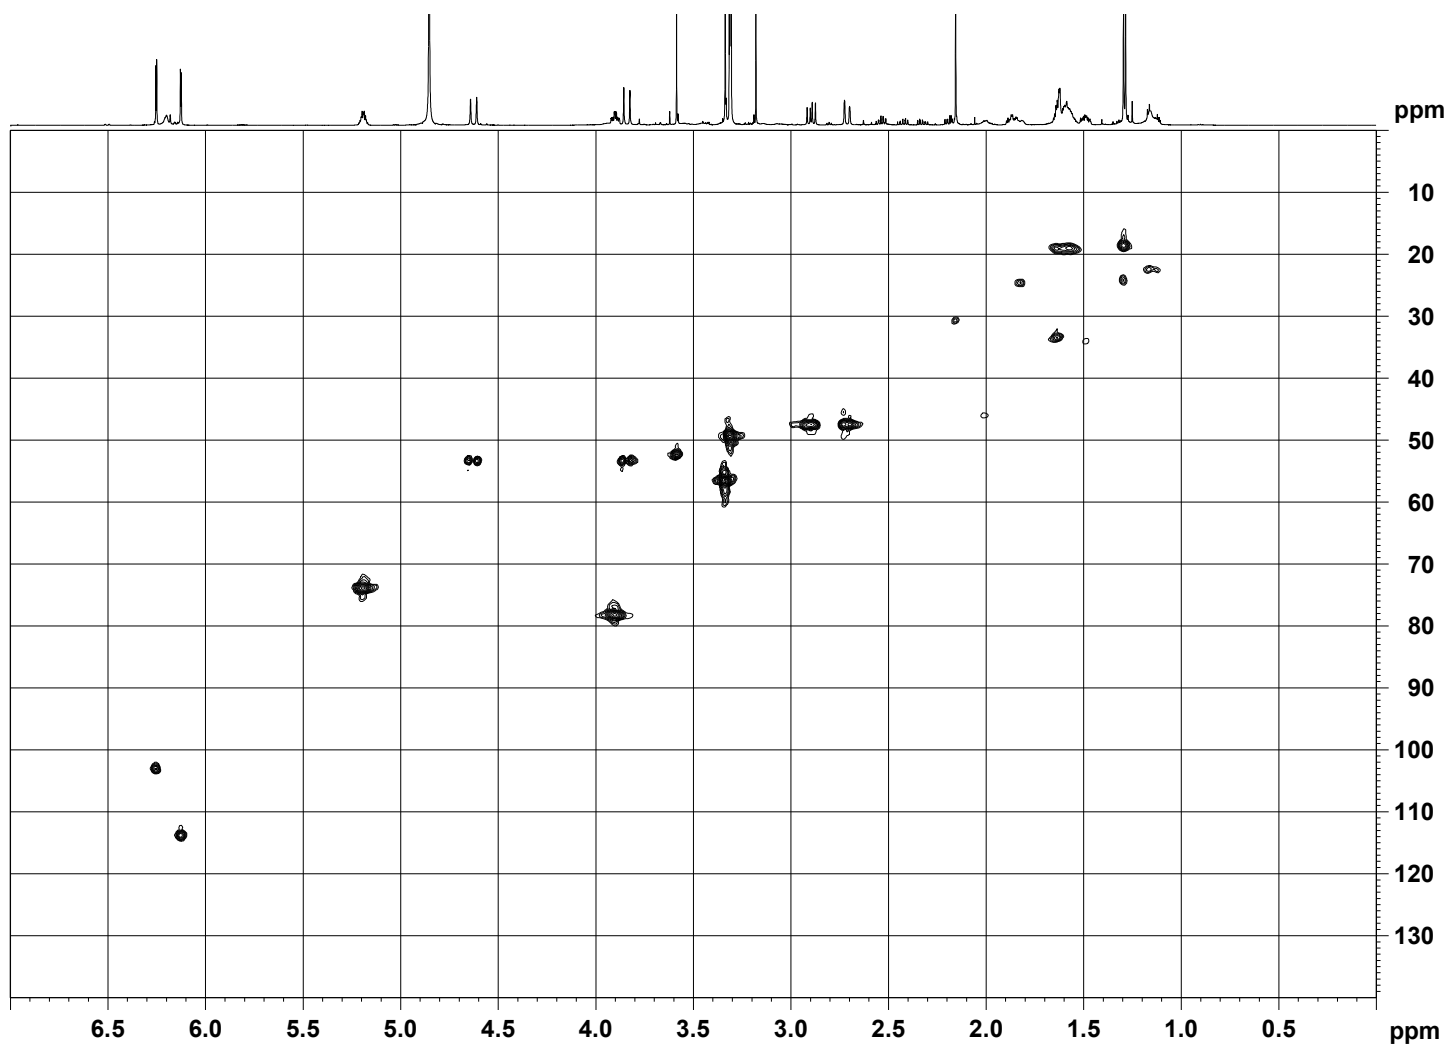

S49. HSQC (600 and 150 MHz, CD<sub>3</sub>OD) spectrum of compound 10.

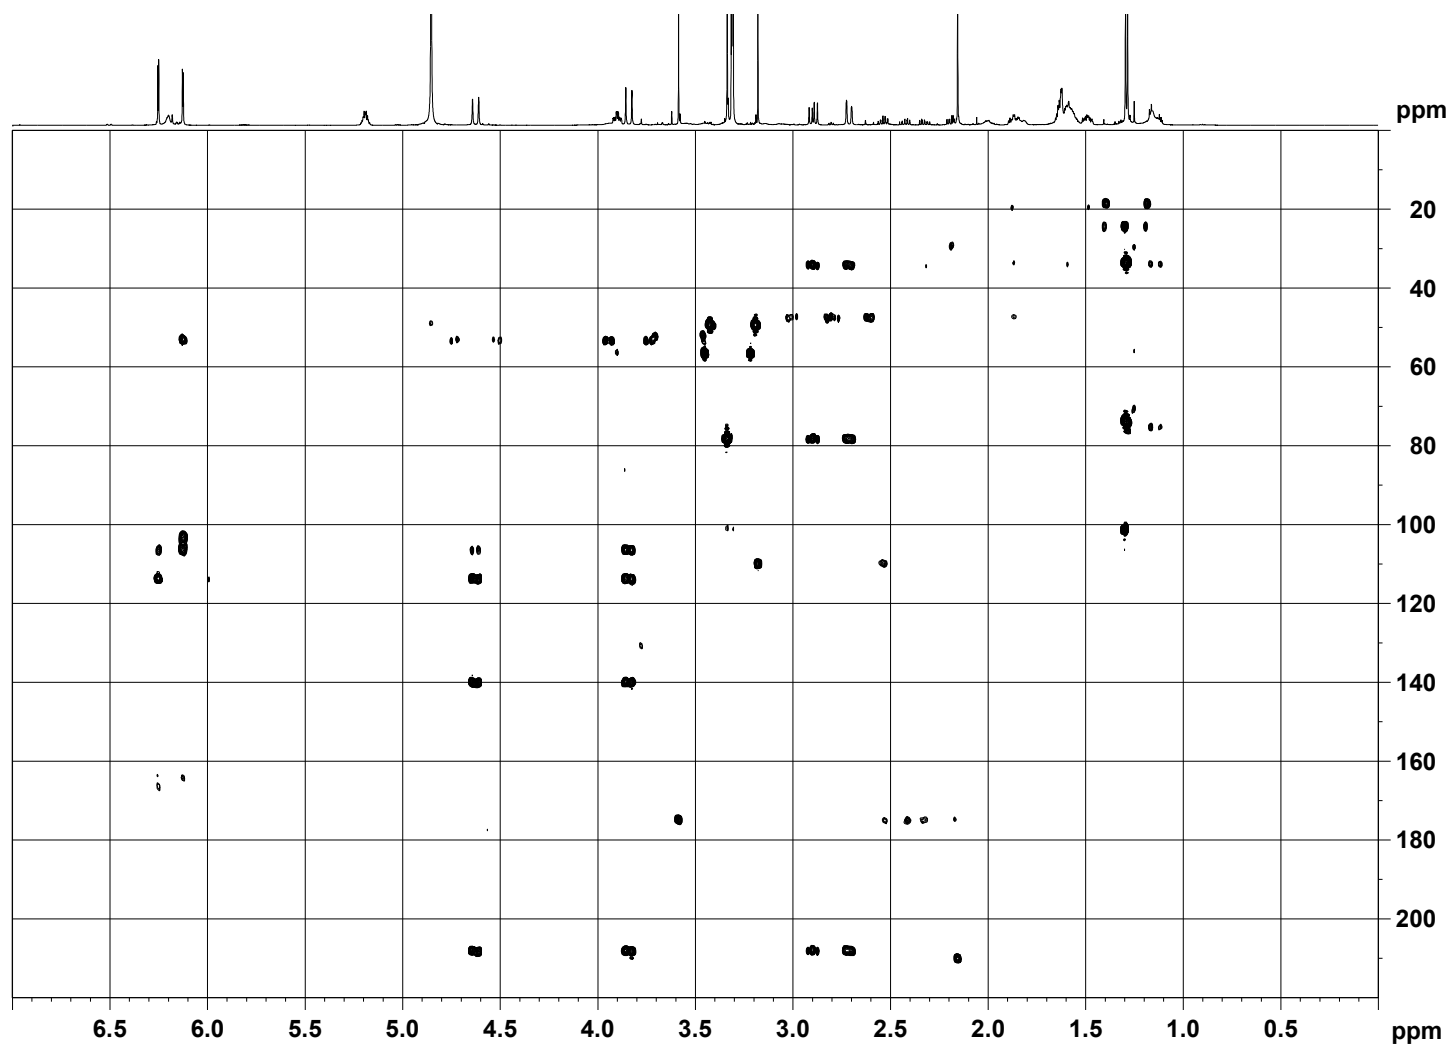

S50. HMBC (600 and 150 MHz, CD<sub>3</sub>OD) spectrum of compound 10.

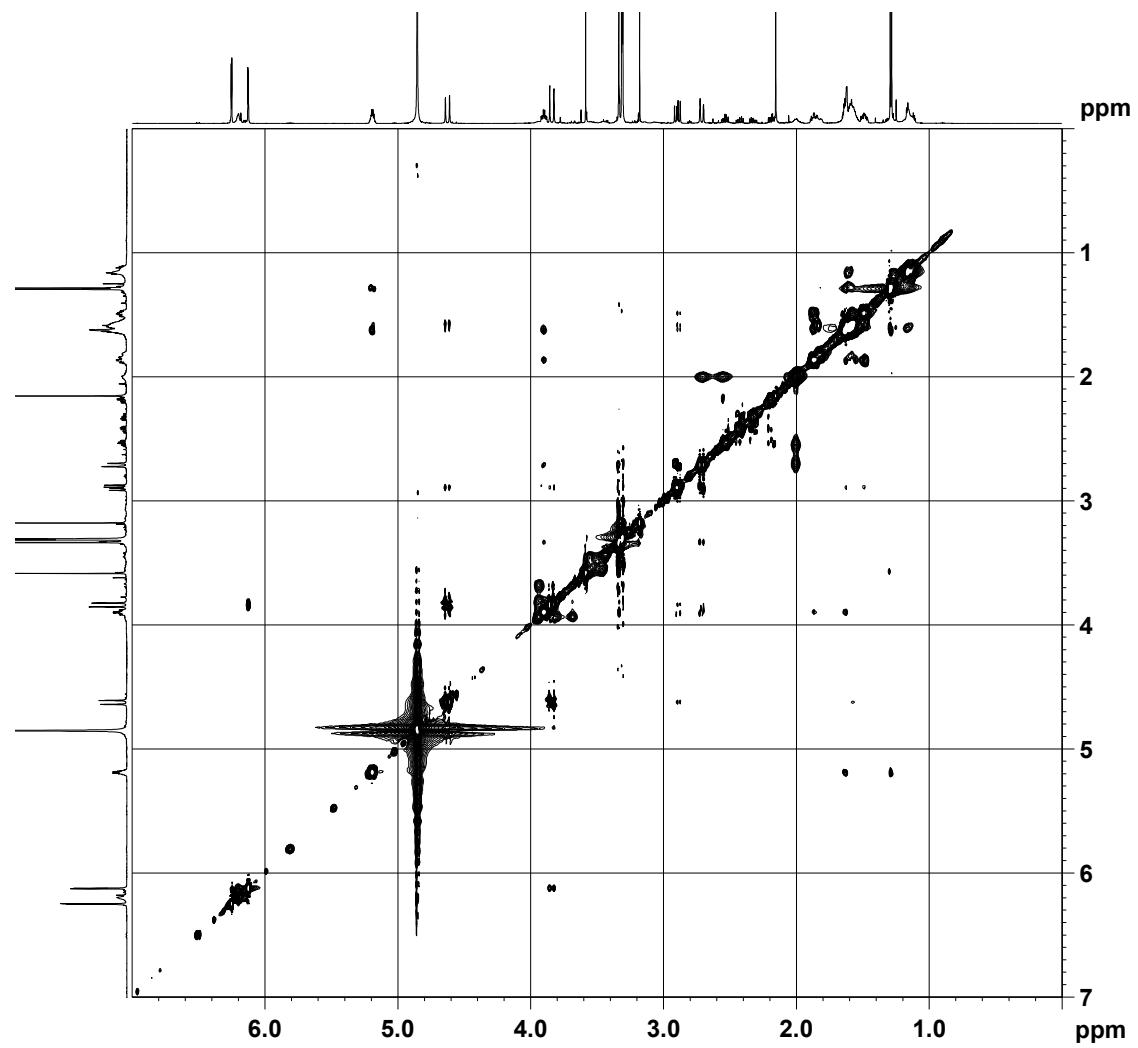

S51. ROESY (600 MHz, CD<sub>3</sub>OD) spectrum of compound 10.

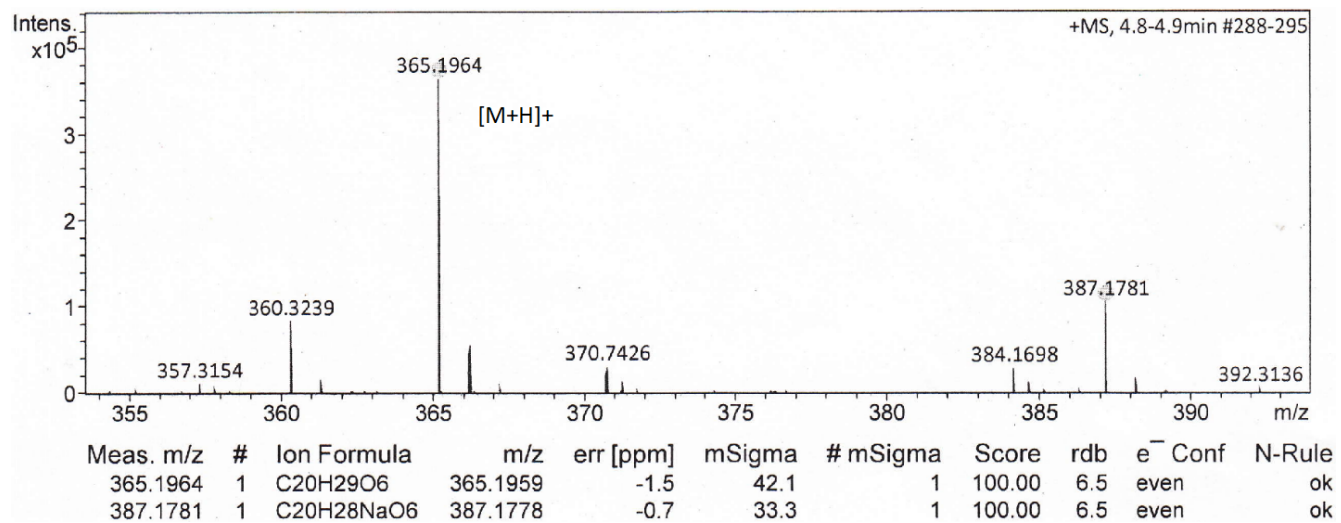

**S52.** HRESIMS spectrum of compound **11**.

Tal60ES5-3-3

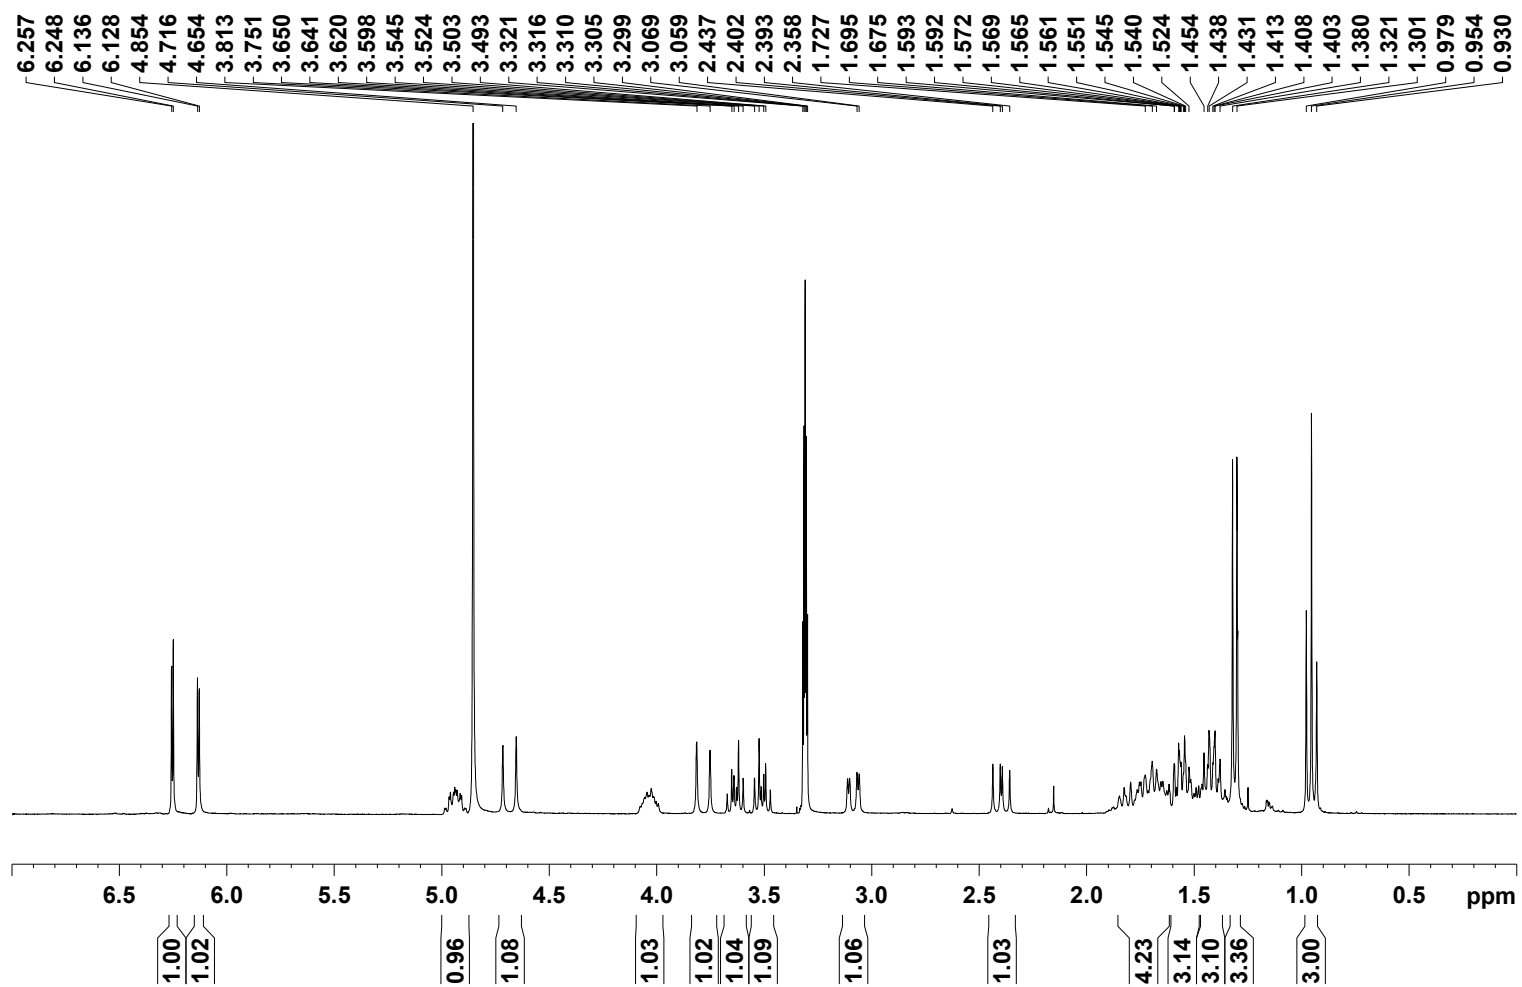

S53. <sup>1</sup>H NMR (300 MHz, CD<sub>3</sub>OD) spectrum of compound 11.

Tal60ES5-3-3

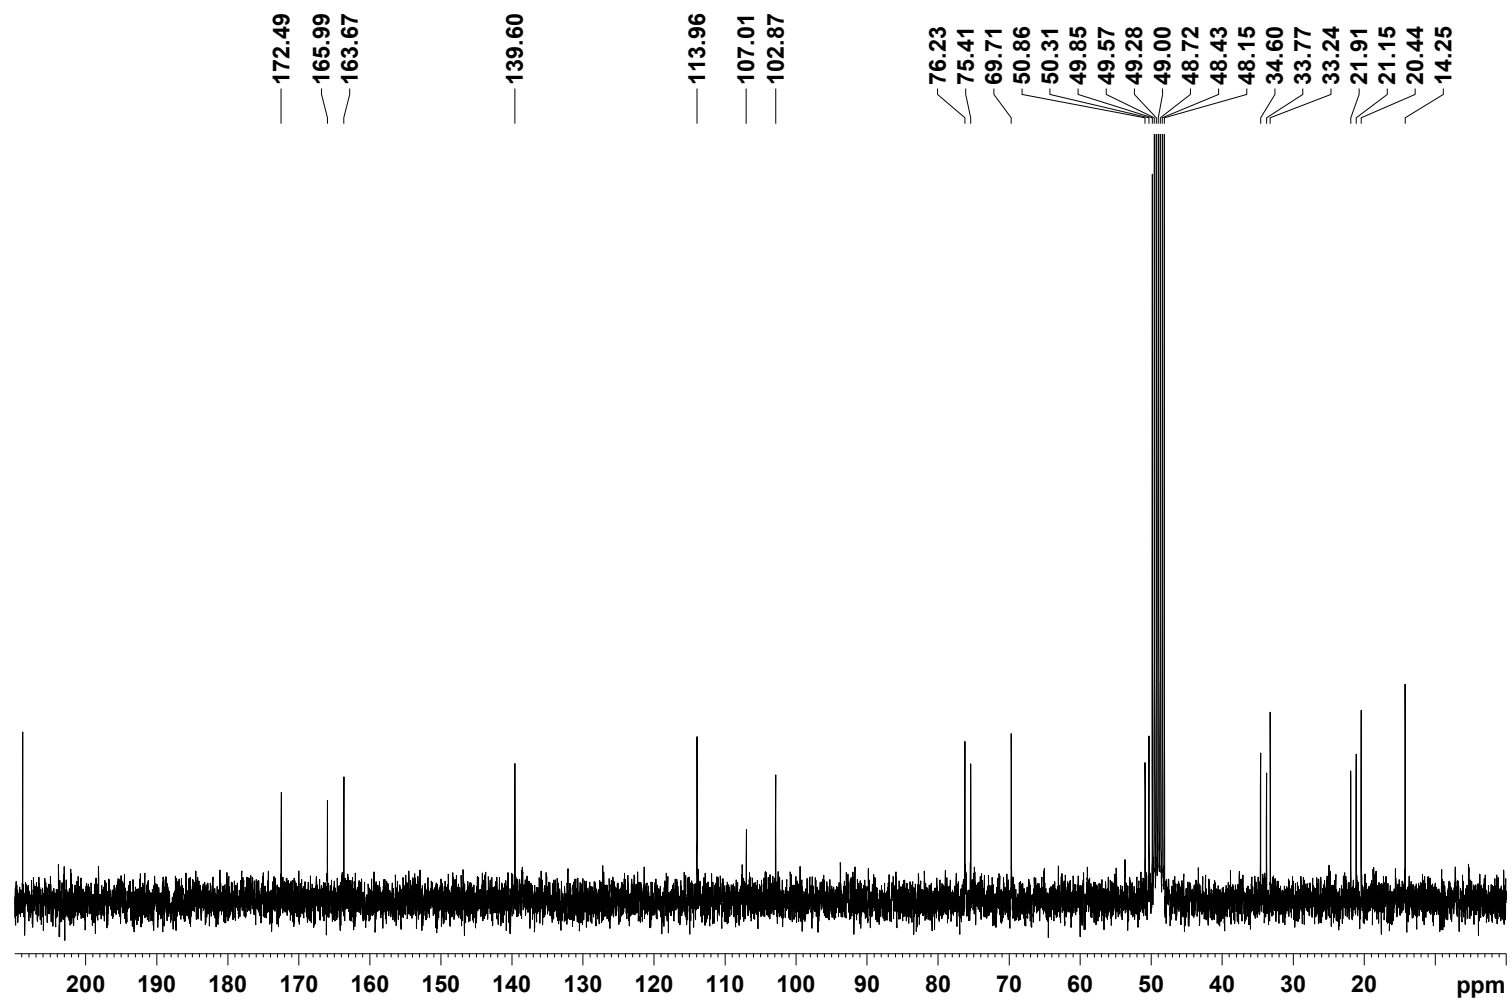

S54.  $^{13}\text{C}$  NMR (75 MHz,  $\text{CD}_3\text{OD}$ ) spectrum of compound **11**.

Tal60ES5-3-3

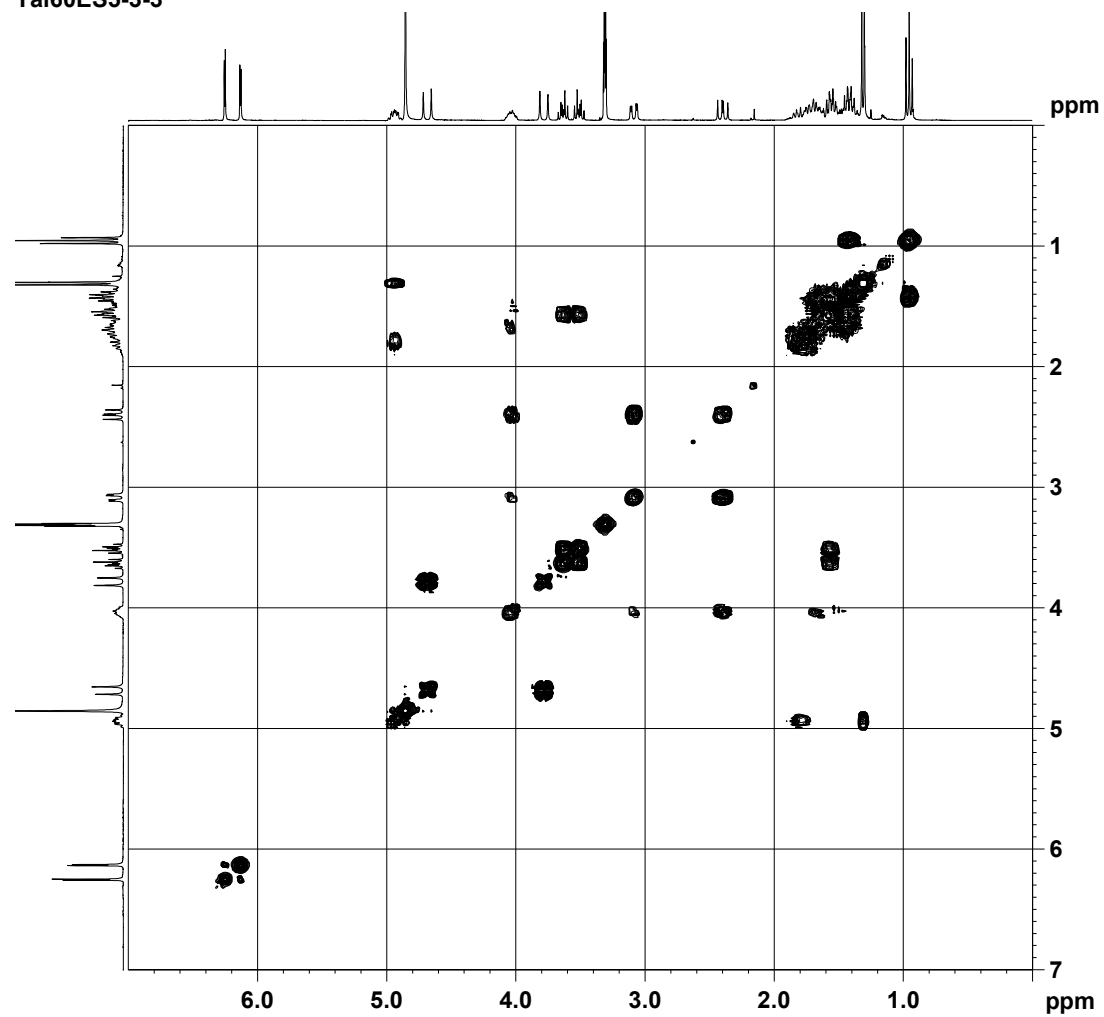

S55.  $^1\text{H}$ - $^1\text{H}$  COSY (300 MHz,  $\text{CD}_3\text{OD}$ ) spectrum of compound 11.



Tal60ES5-3-3

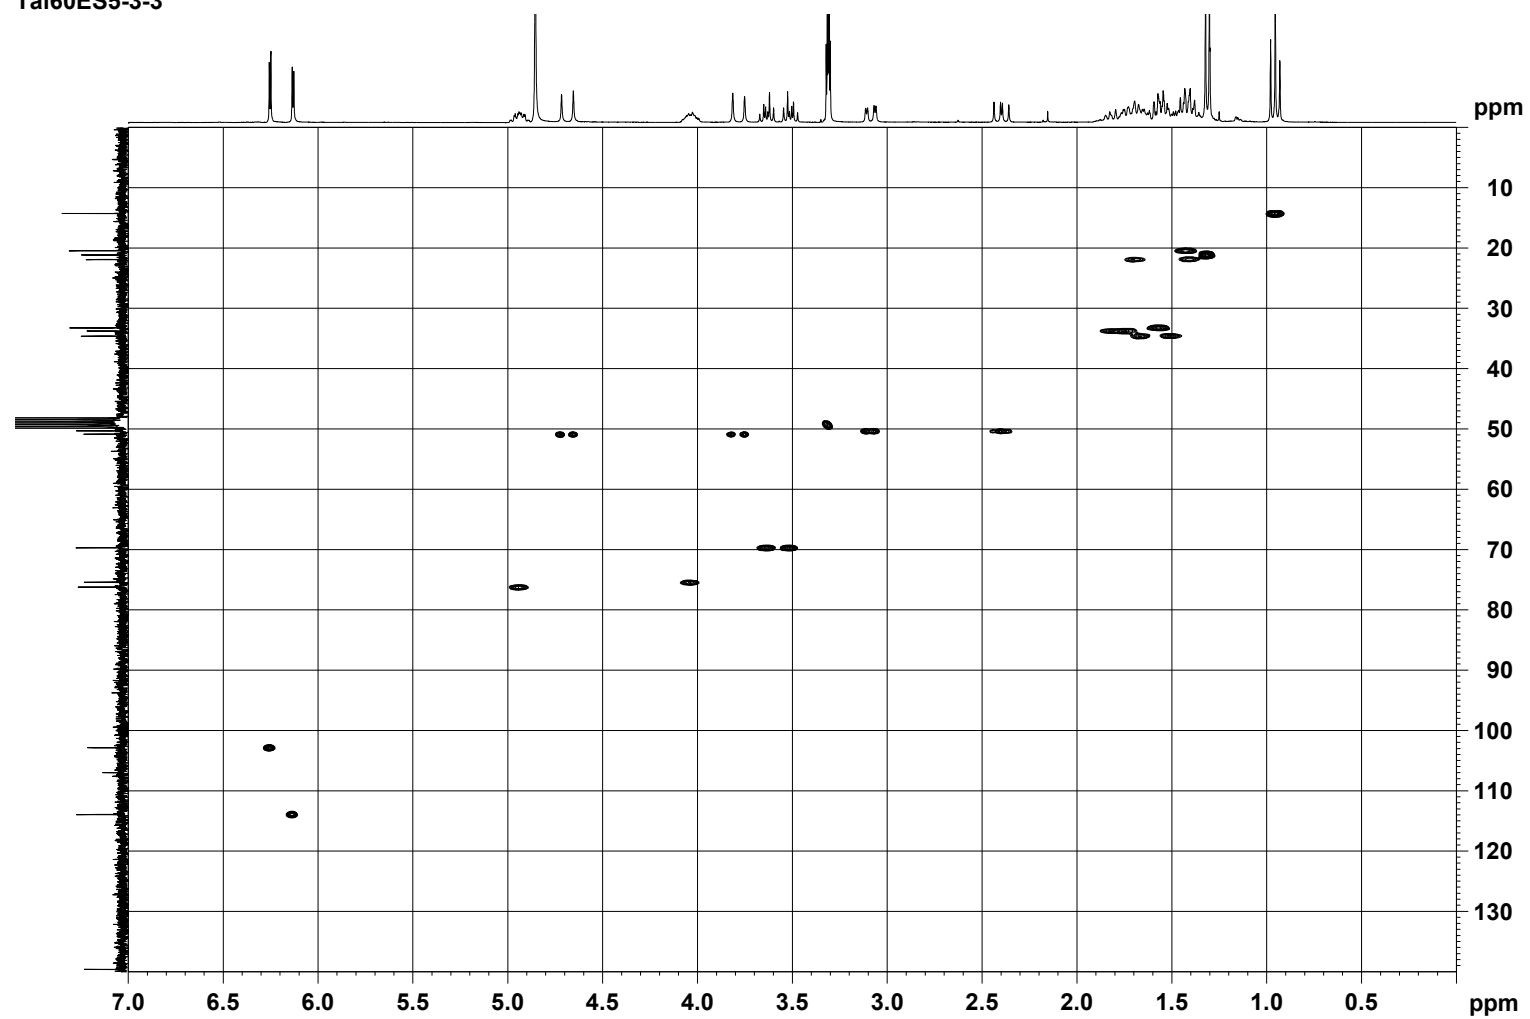

S56. HSQC (300 and 75 MHz, CD<sub>3</sub>OD) spectrum of compound 11.

Tal60ES5-3-3

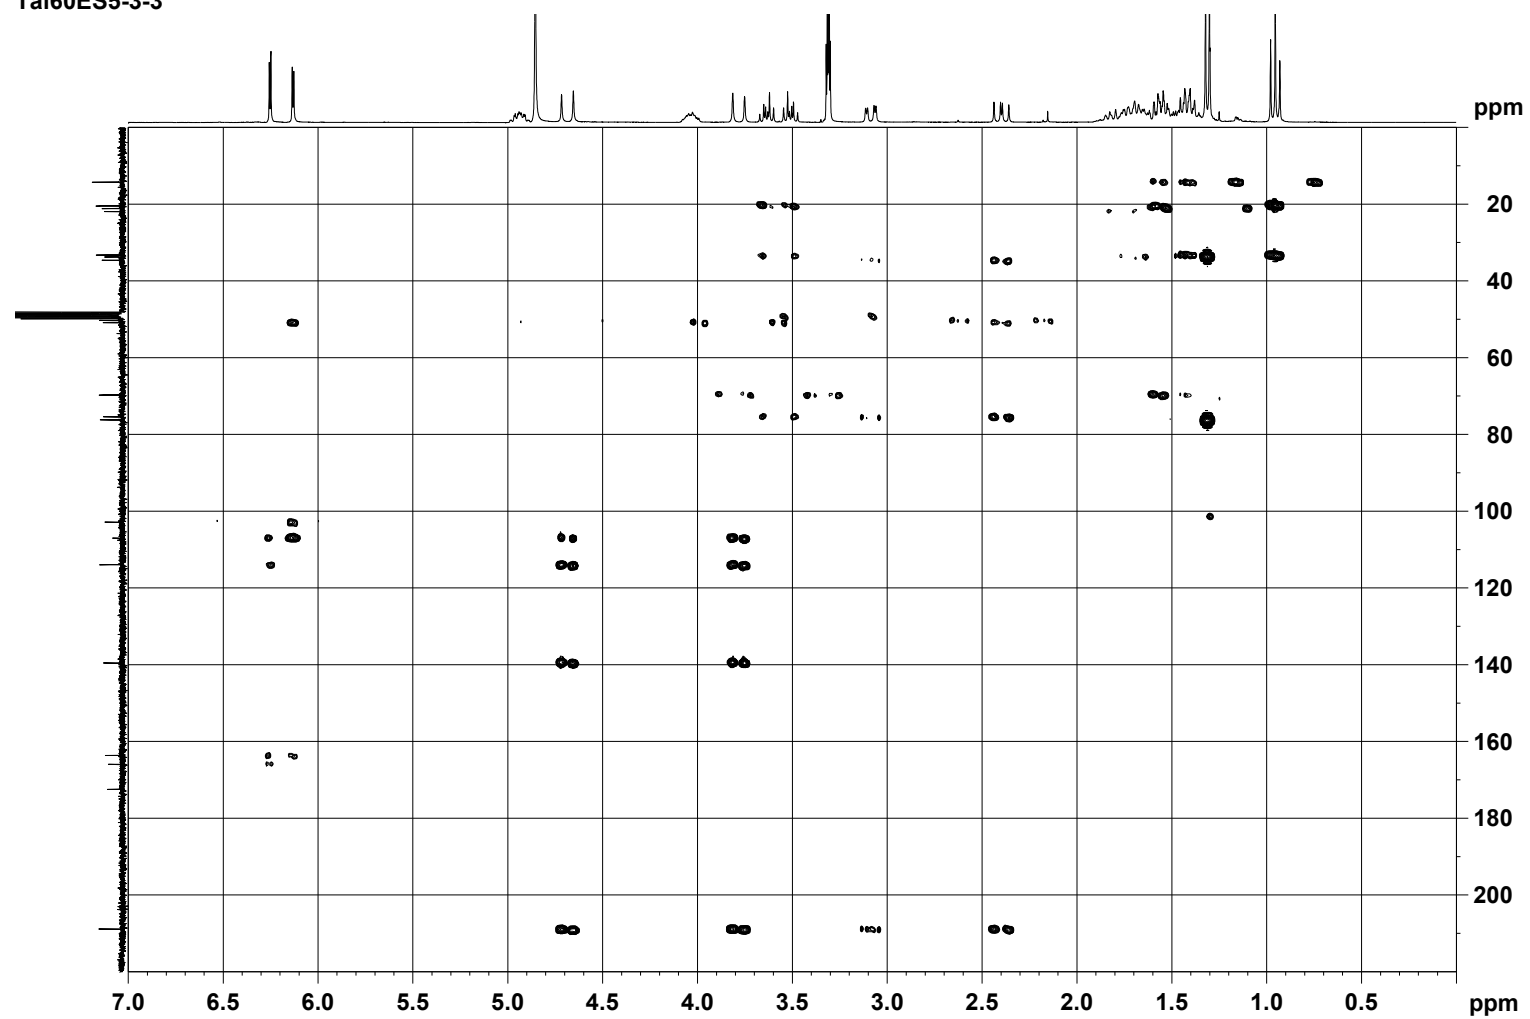

S57. HMBC (300 and 75 MHz, CD<sub>3</sub>OD) spectrum of compound **11**.

Tal60ES6-3-3

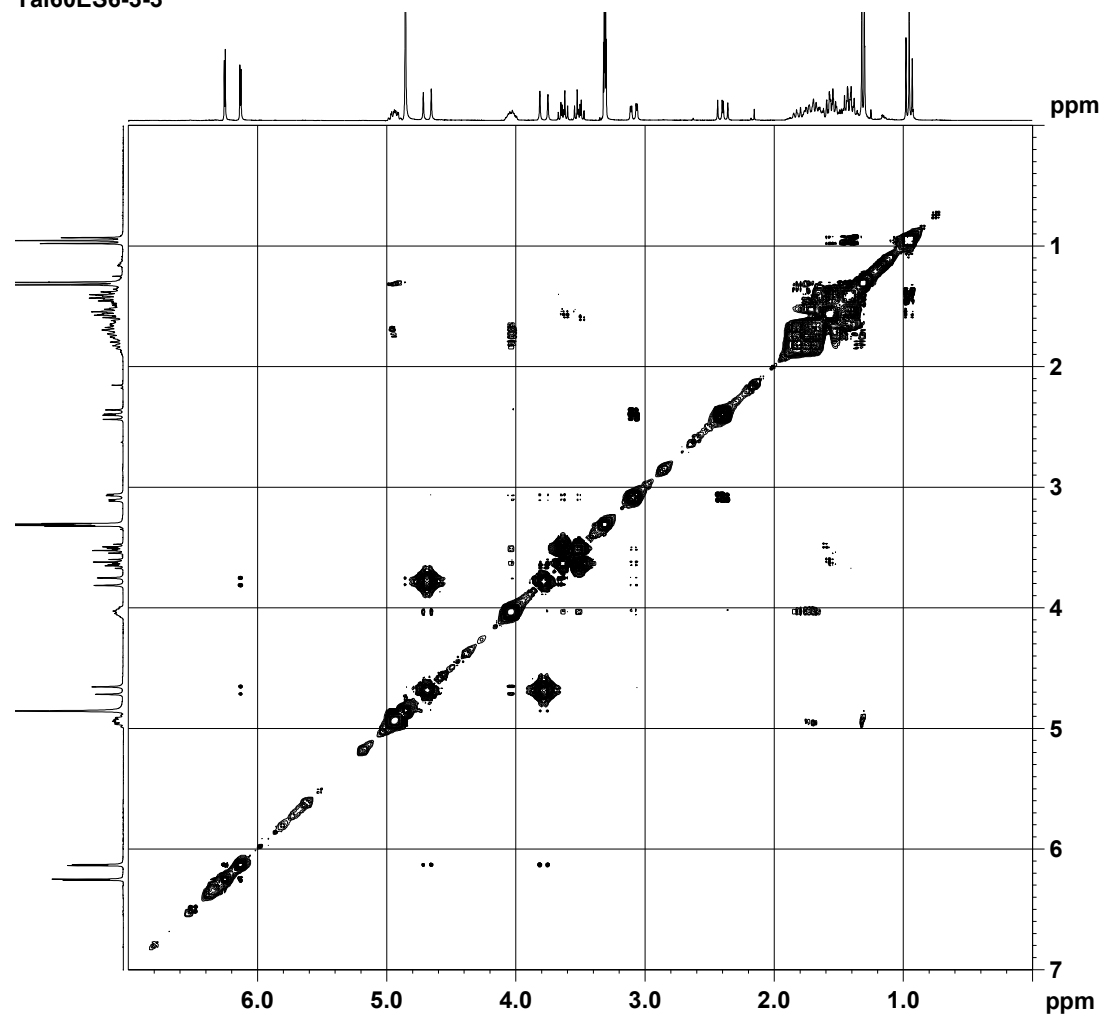

S58. ROESY (300 MHz, CD<sub>3</sub>OD) spectrum of compound 11.

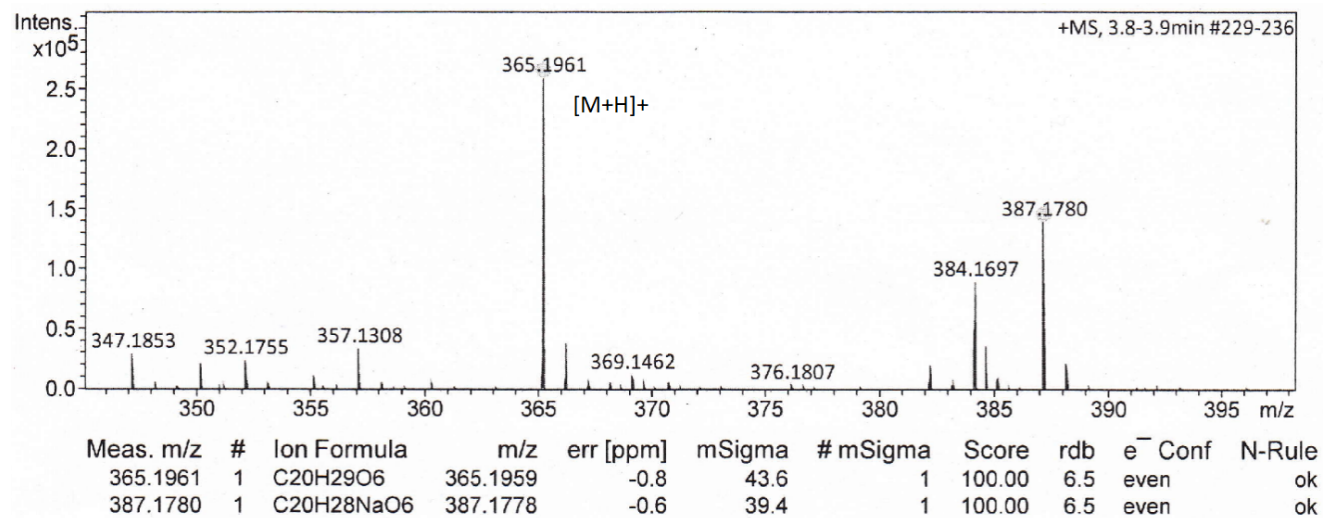

S59. HRESIMS spectrum of compound 12.

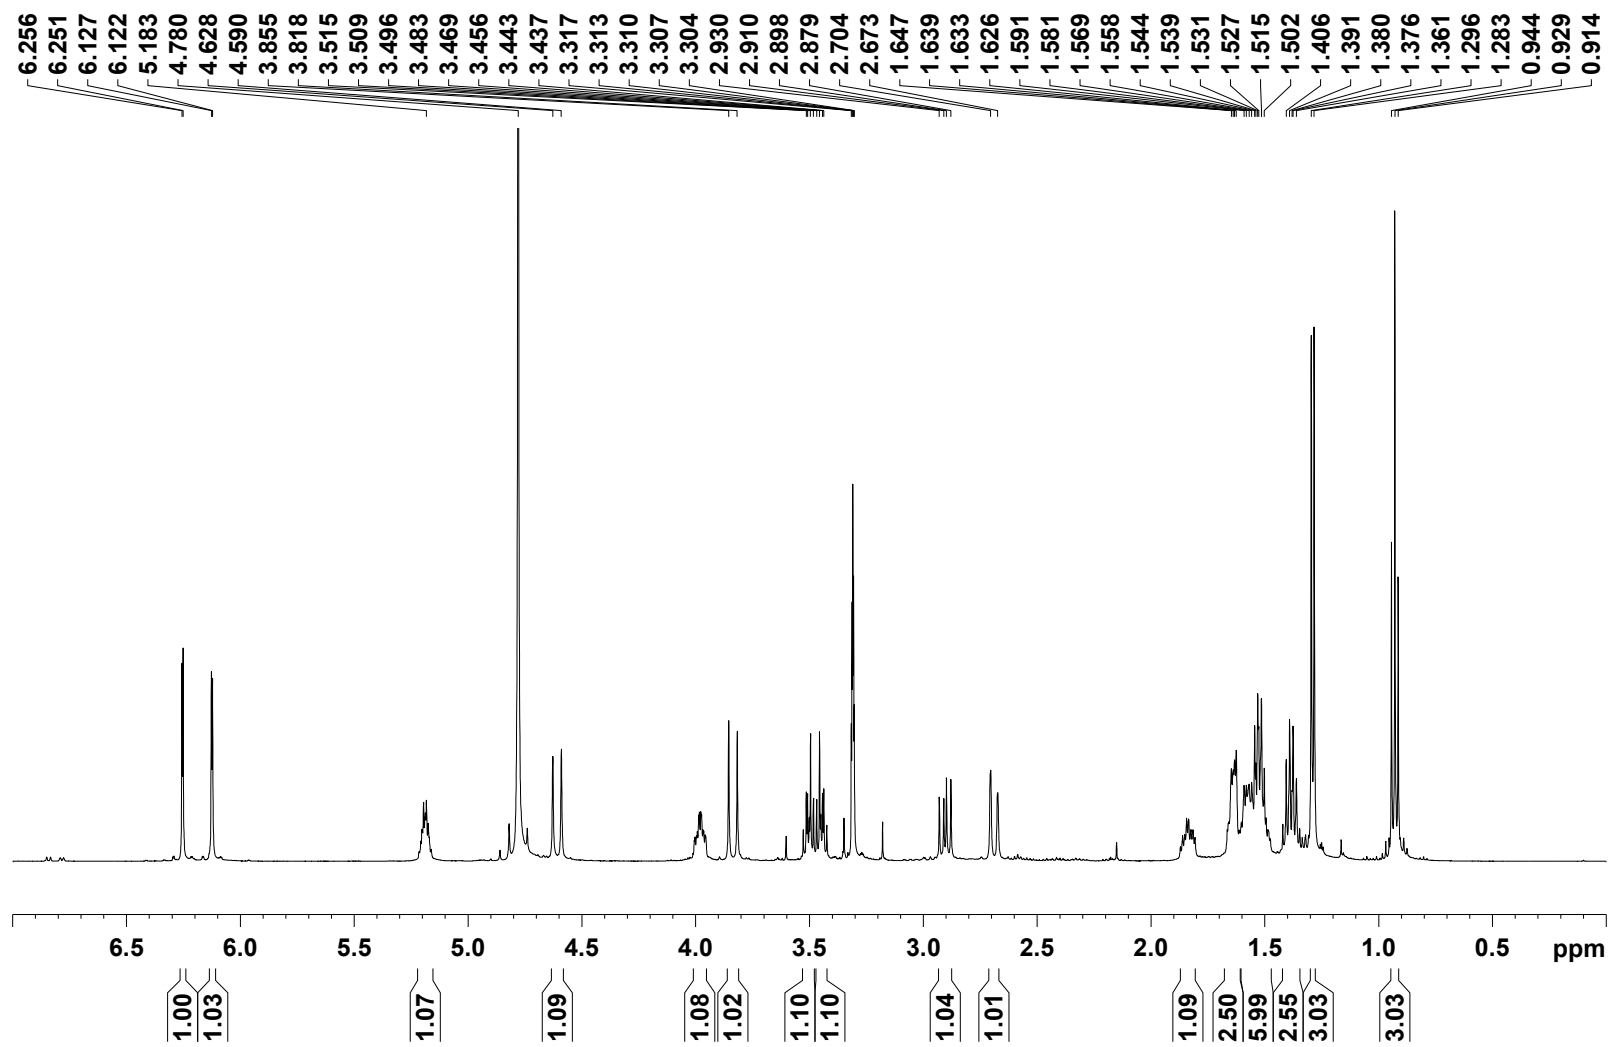

S60.  $^1\text{H}$  NMR (500 MHz,  $\text{CD}_3\text{OD}$ ) spectrum of compound 12.

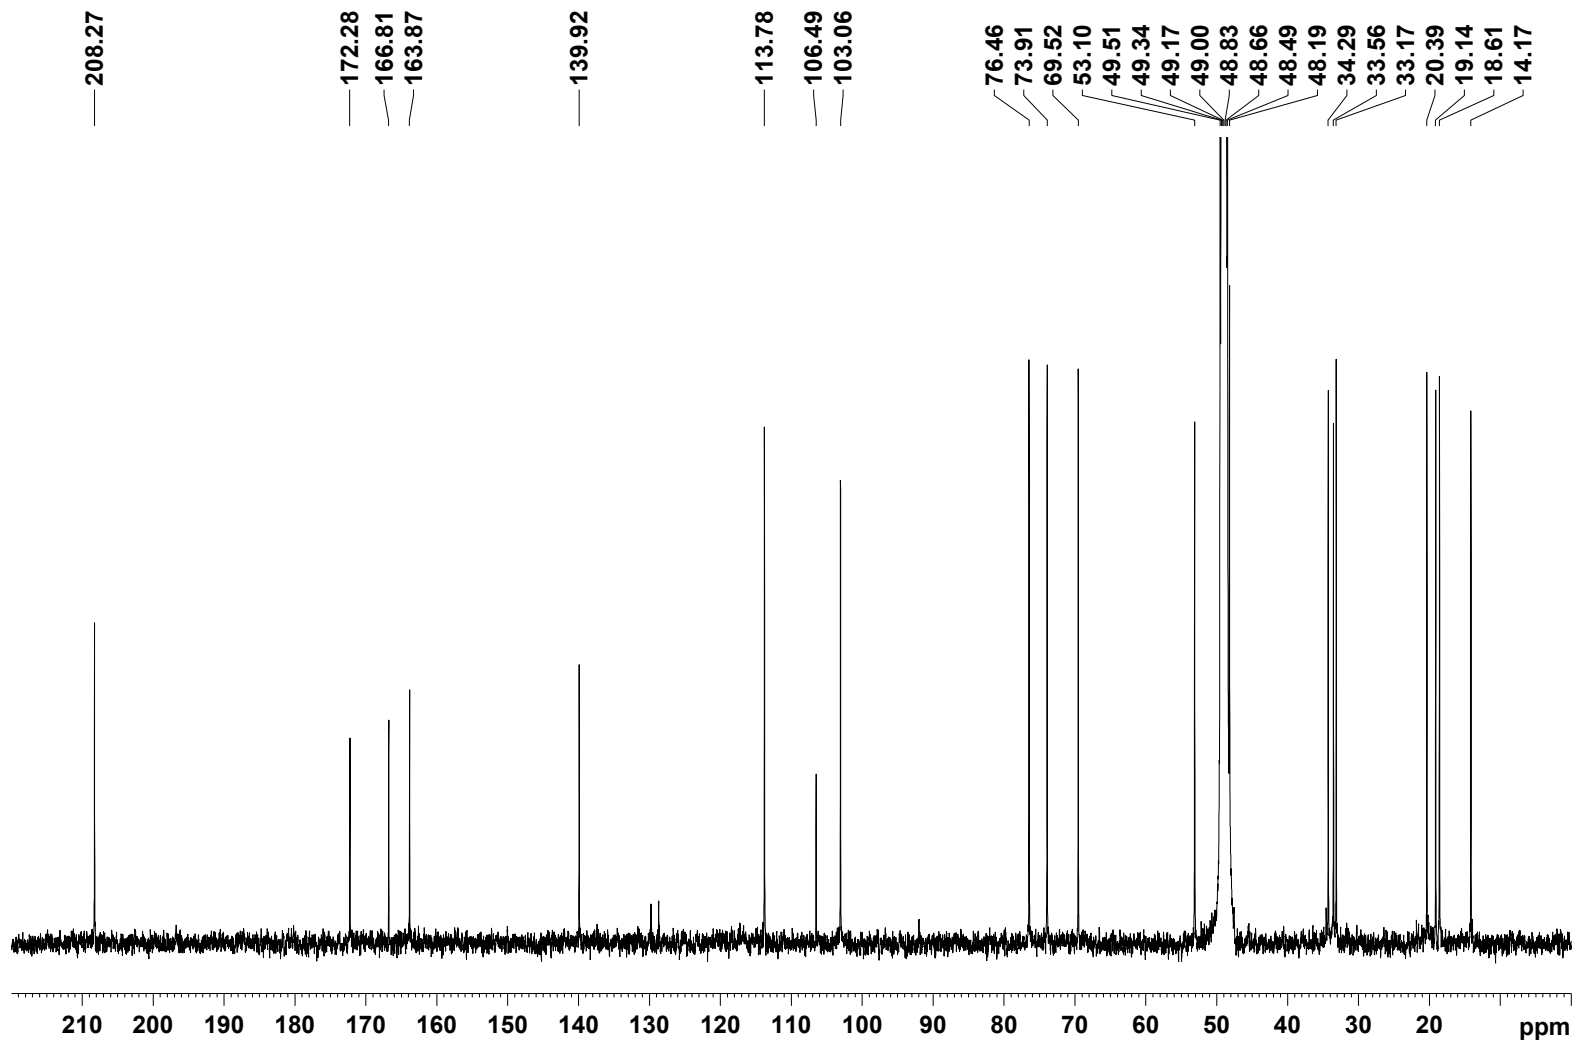

S61. <sup>13</sup>C NMR (125 MHz, CD<sub>3</sub>OD) spectrum of compound 12.

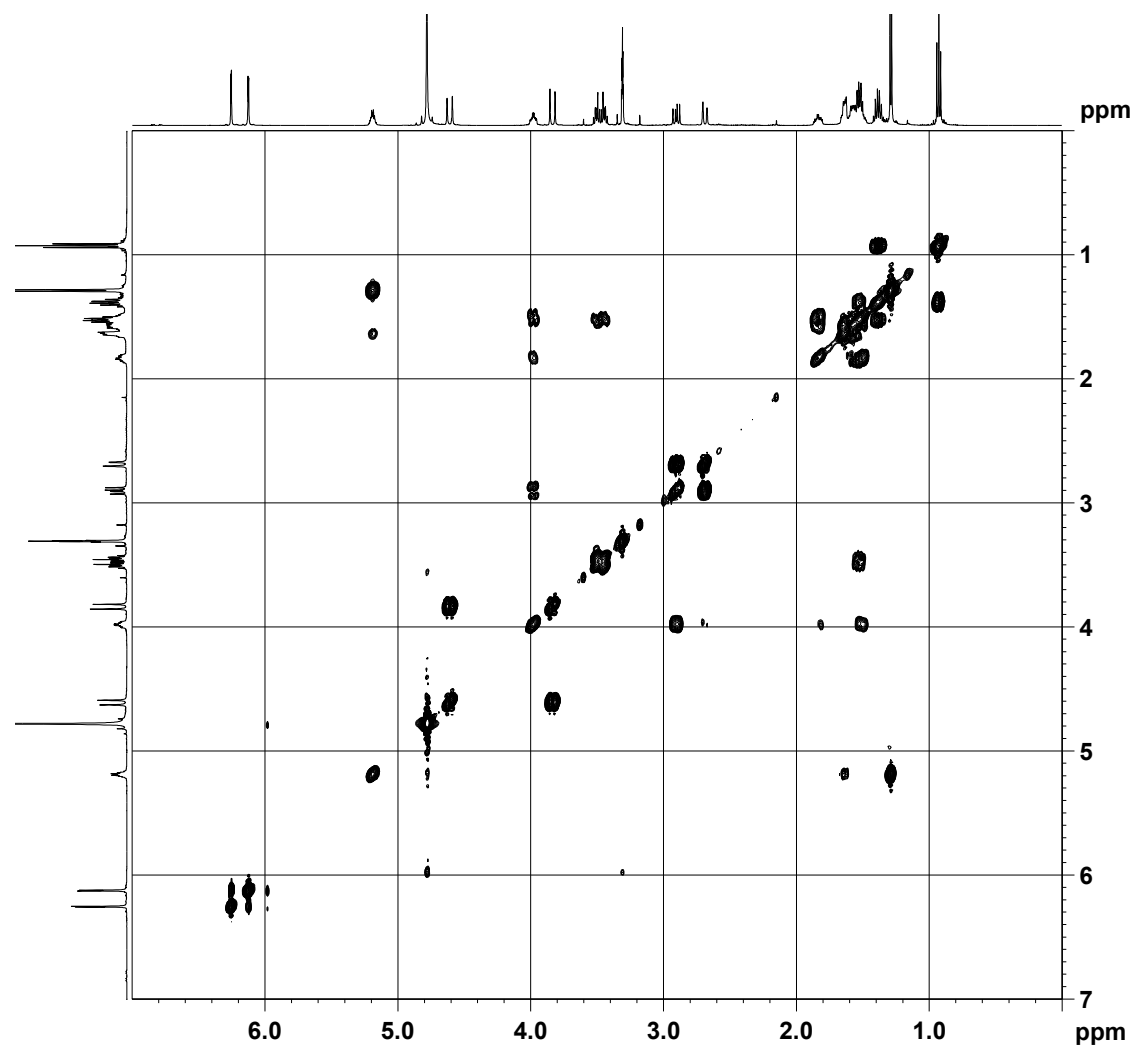

S62.  $^1\text{H}$ - $^1\text{H}$  COSY (500 MHz,  $\text{CD}_3\text{OD}$ ) spectrum of compound 12.

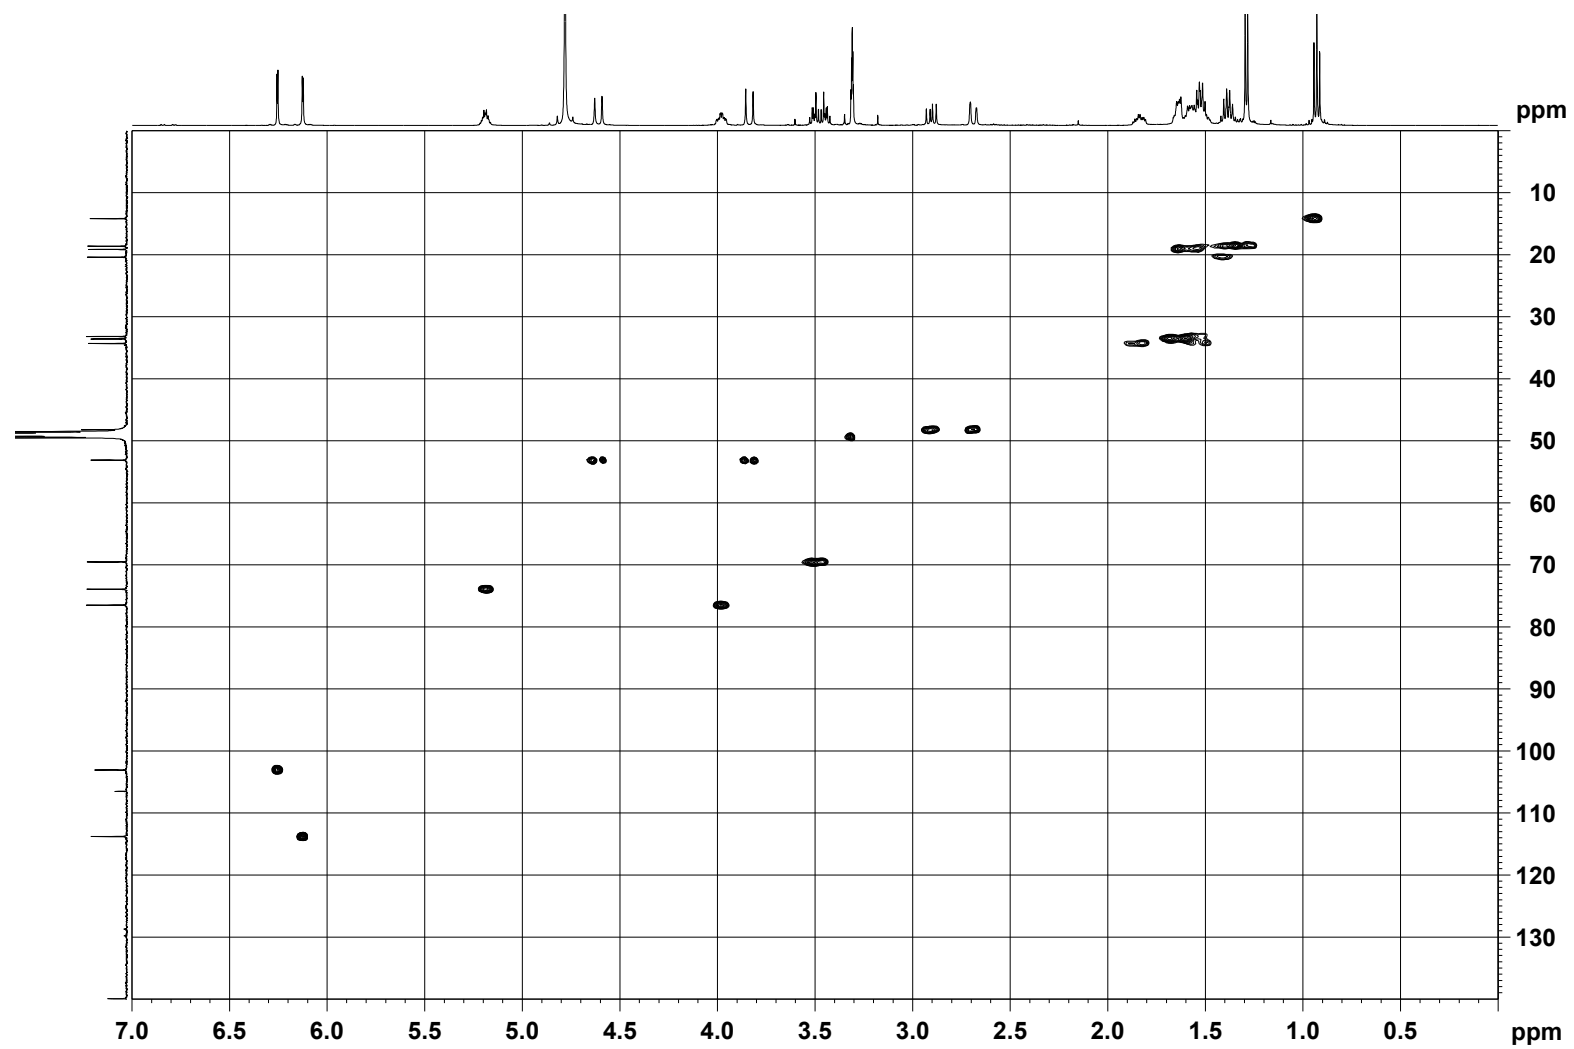

S63. HSQC (500 and 125 MHz,  $\text{CD}_3\text{OD}$ ) spectrum of compound 12.



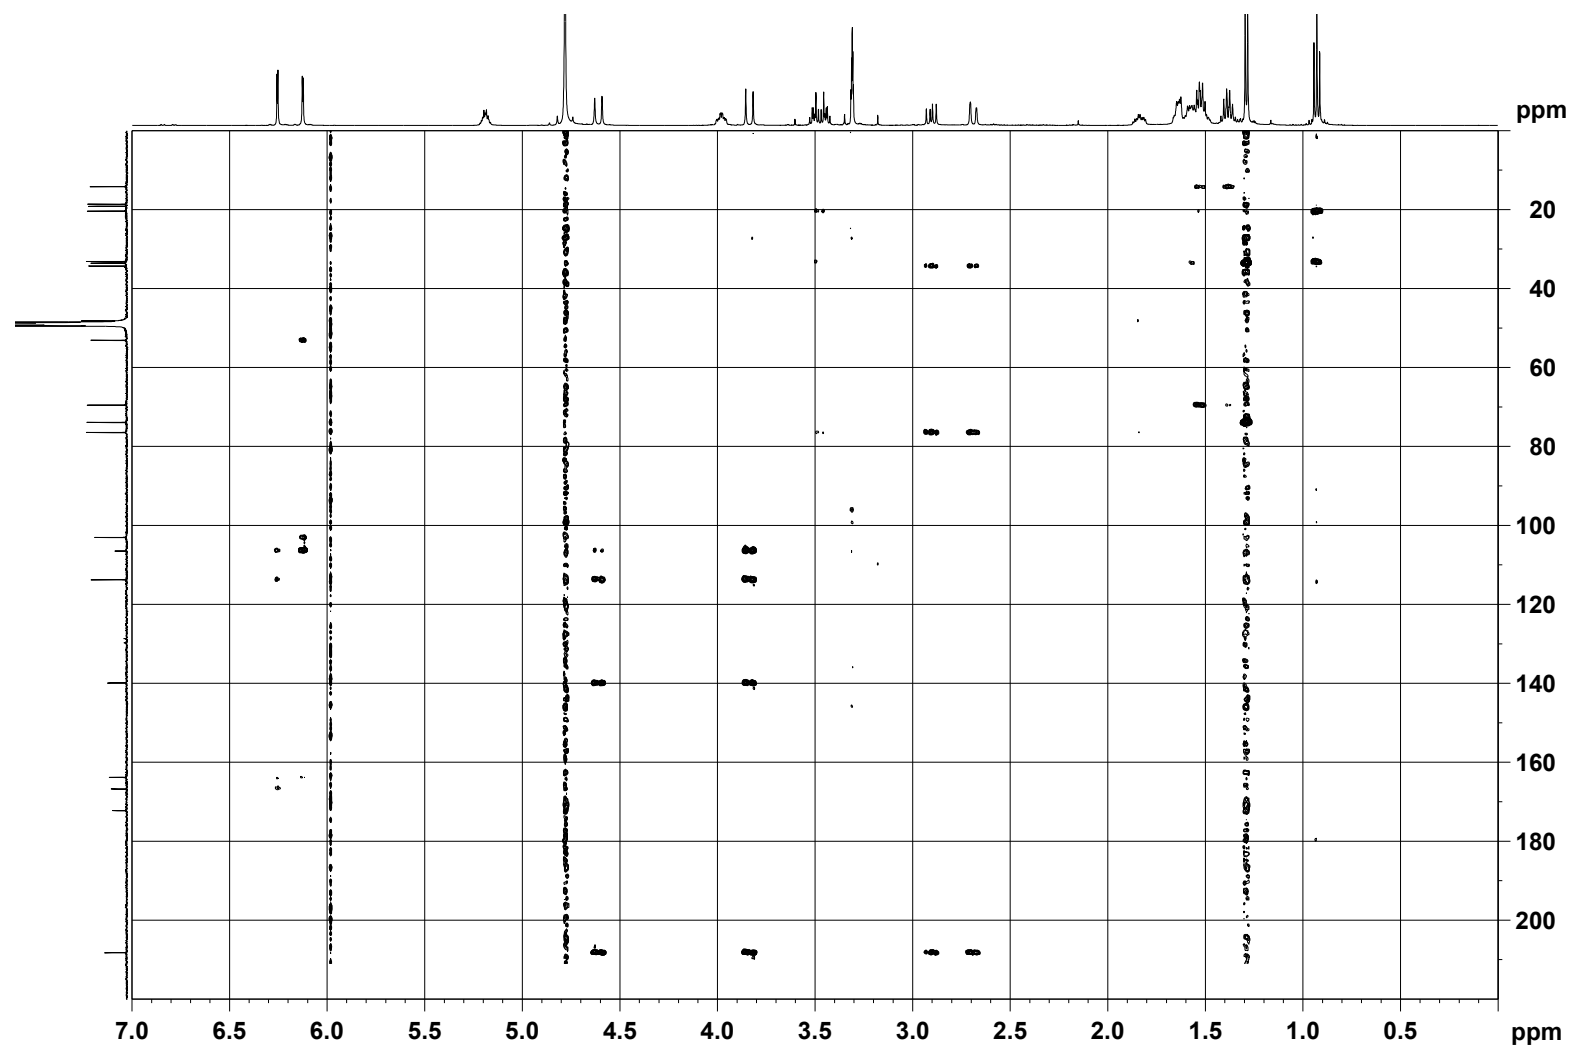

S64. HMBC (500 and 125 MHz,  $\text{CD}_3\text{OD}$ ) spectrum of compound 12.

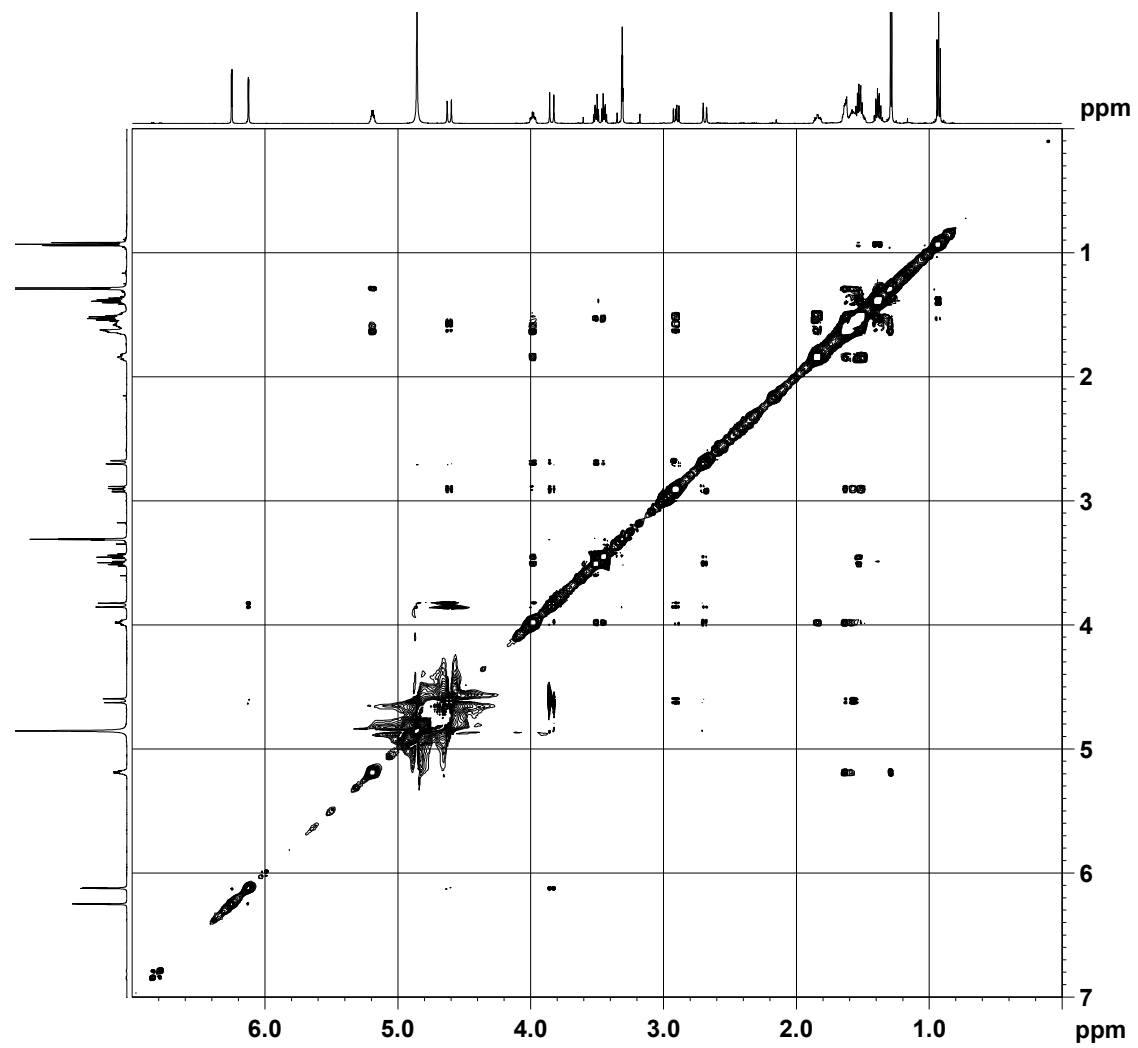

S65. ROESY (500 MHz, CD<sub>3</sub>OD) spectrum of compound 12

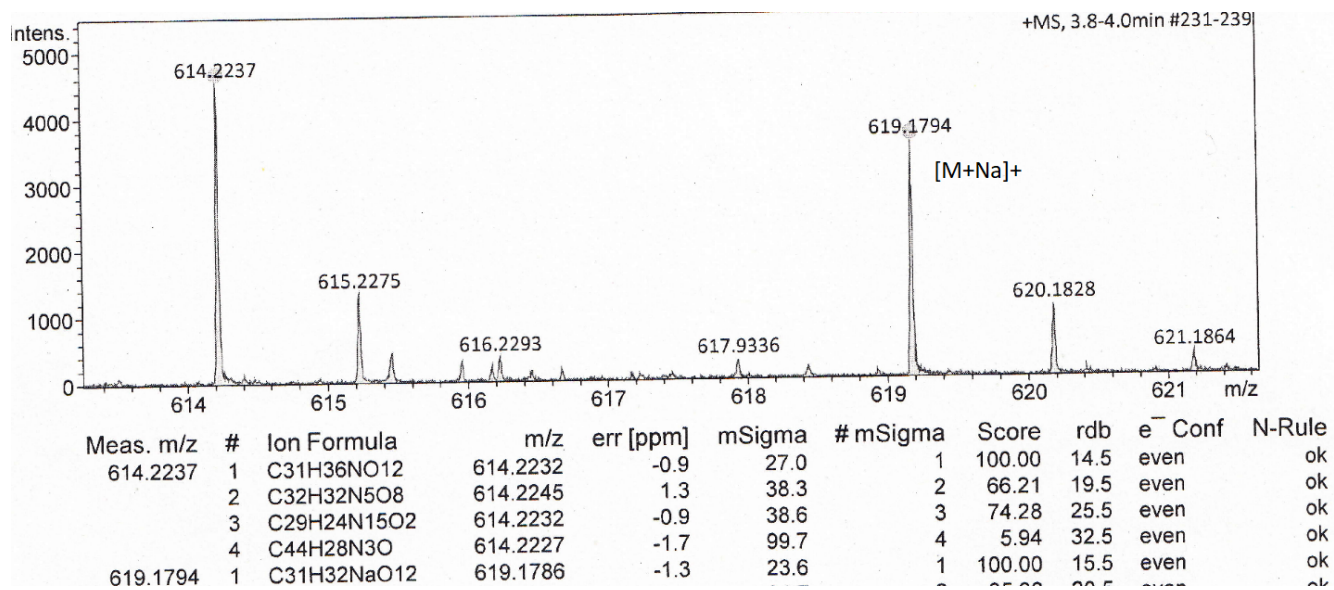

S66. HRESIMS spectrum of compound 13.

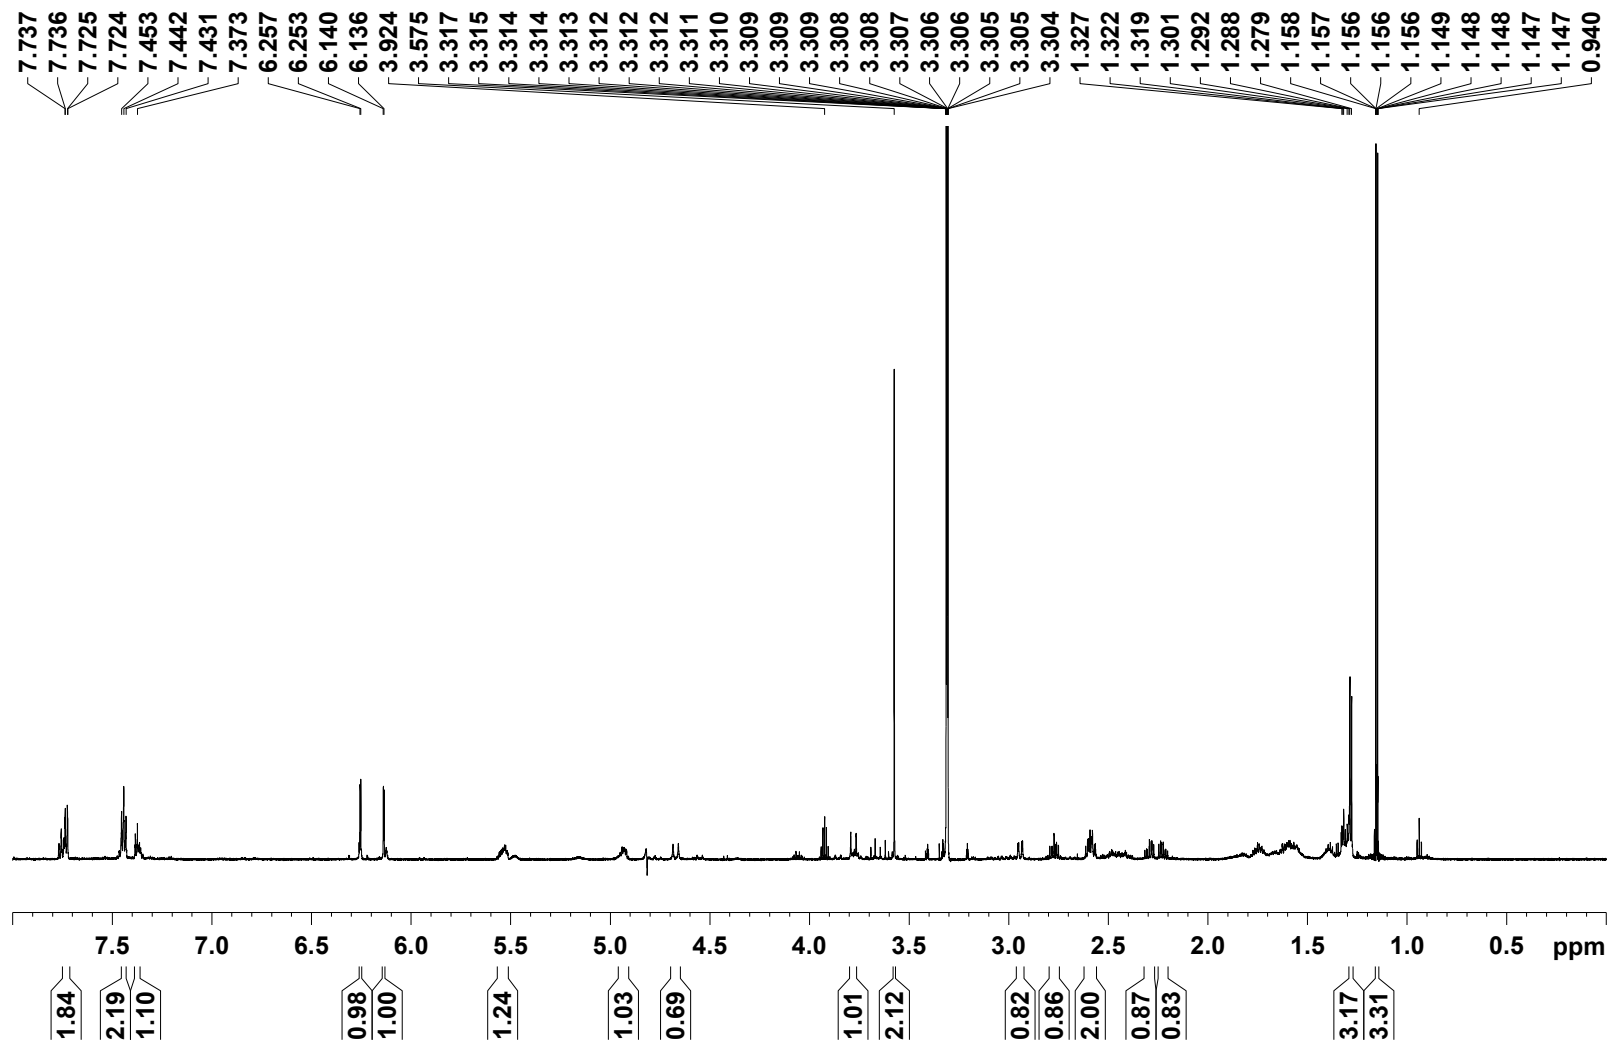

S67.  $^1\text{H}$  NMR (700 MHz,  $\text{CD}_3\text{OD}$ ) spectrum of compound 13.

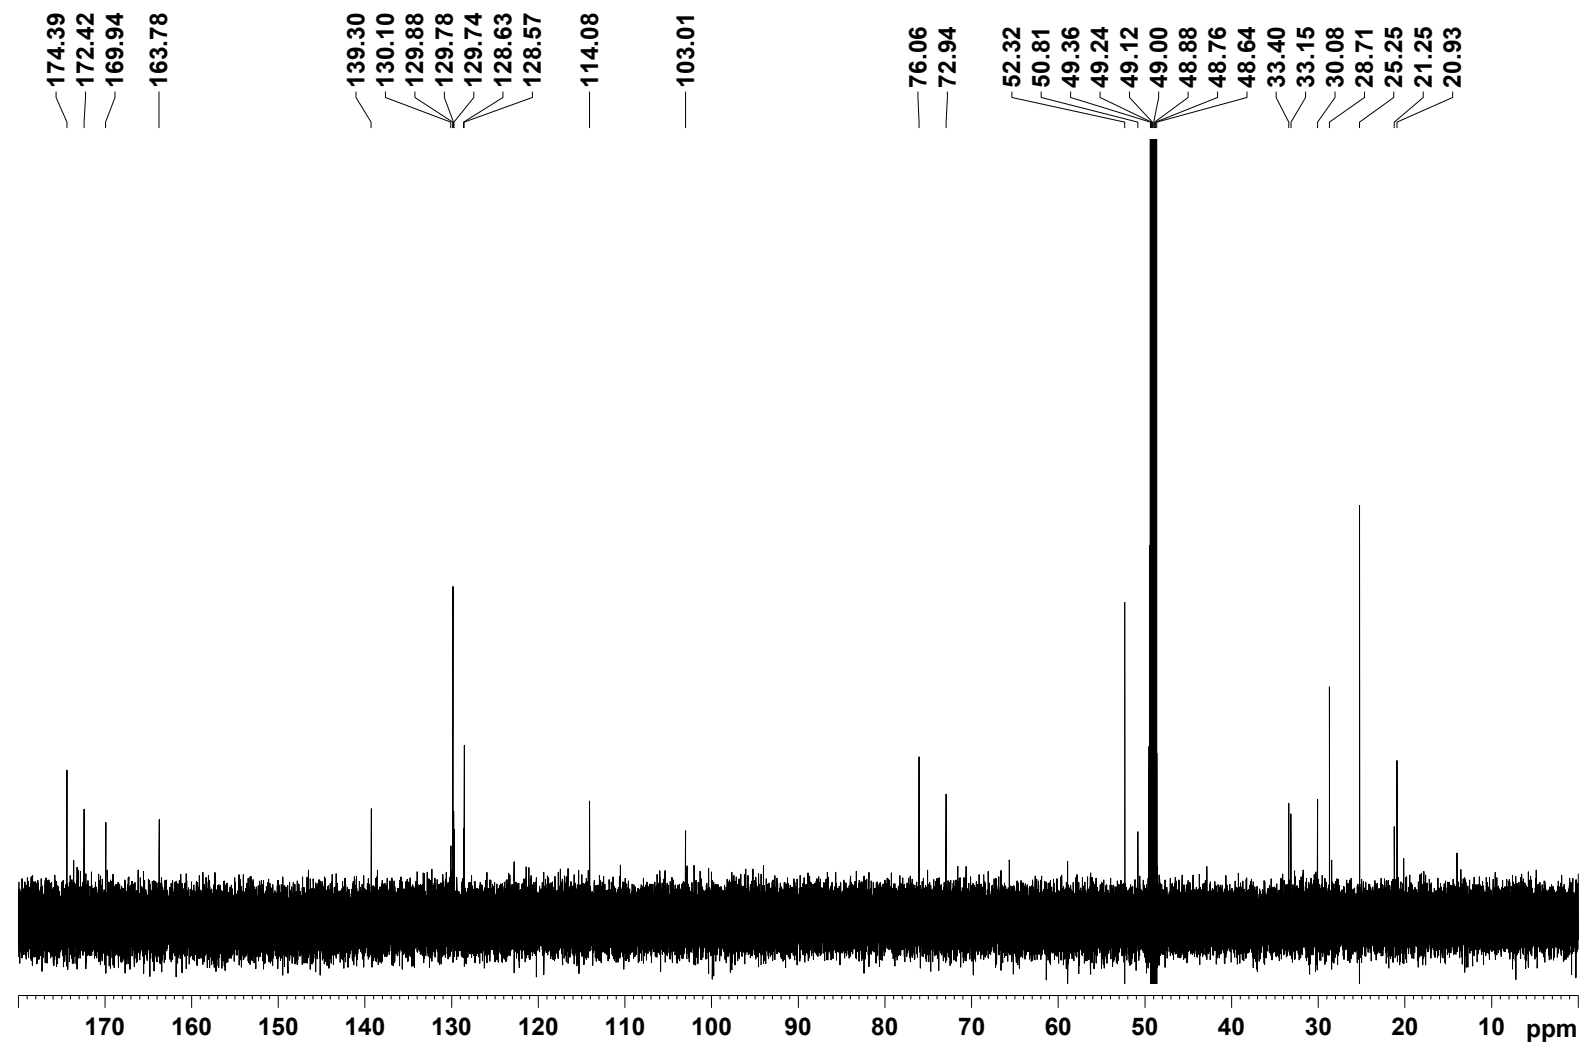

S68.  $^{13}\text{C}$  NMR (175 MHz,  $\text{CD}_3\text{OD}$ ) spectrum of compound **13**.

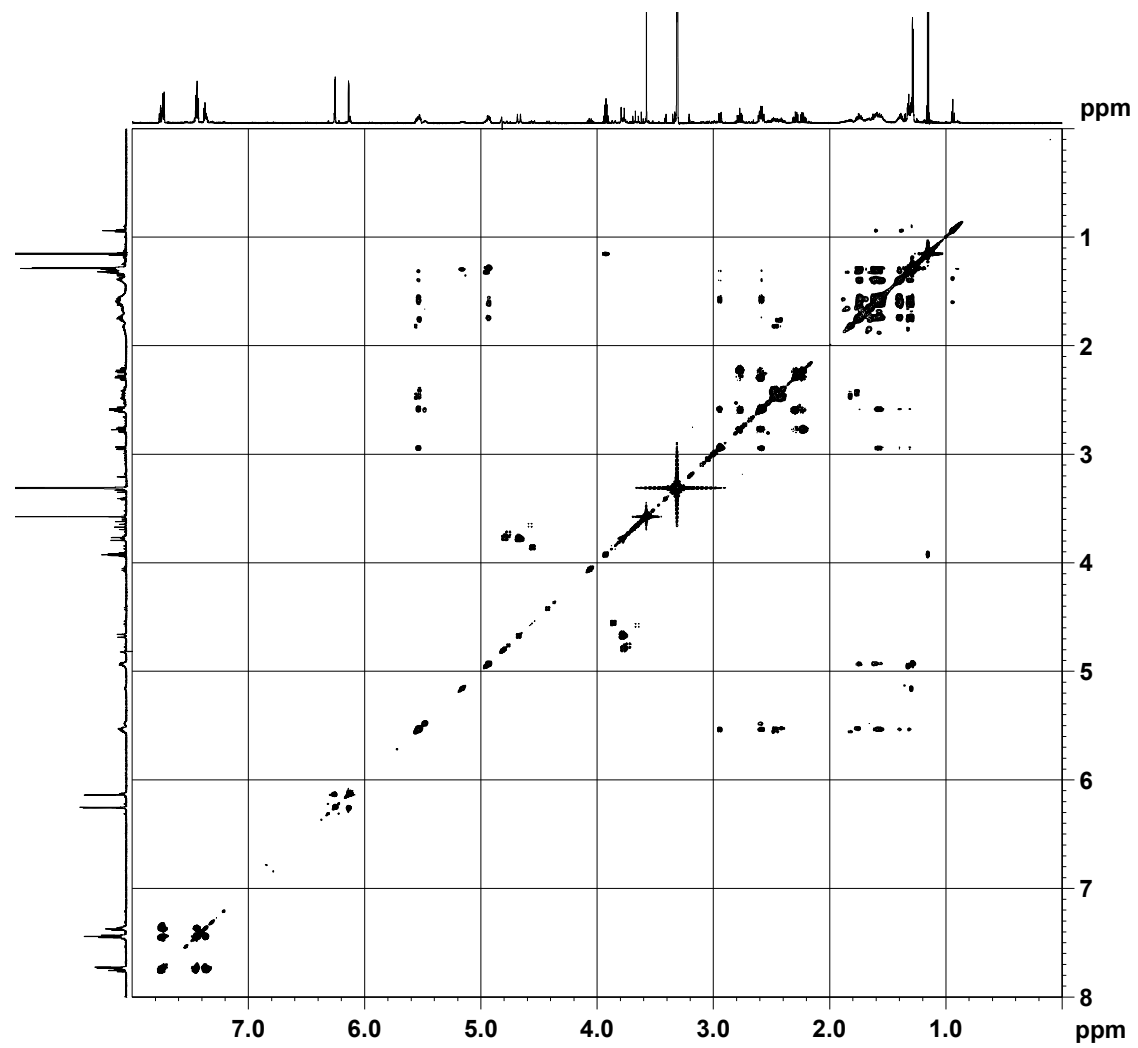

S69.  $^1\text{H}$ - $^1\text{H}$  TOCSY NMR (700 MHz,  $\text{CD}_3\text{OD}$ ) spectrum of compound 13.

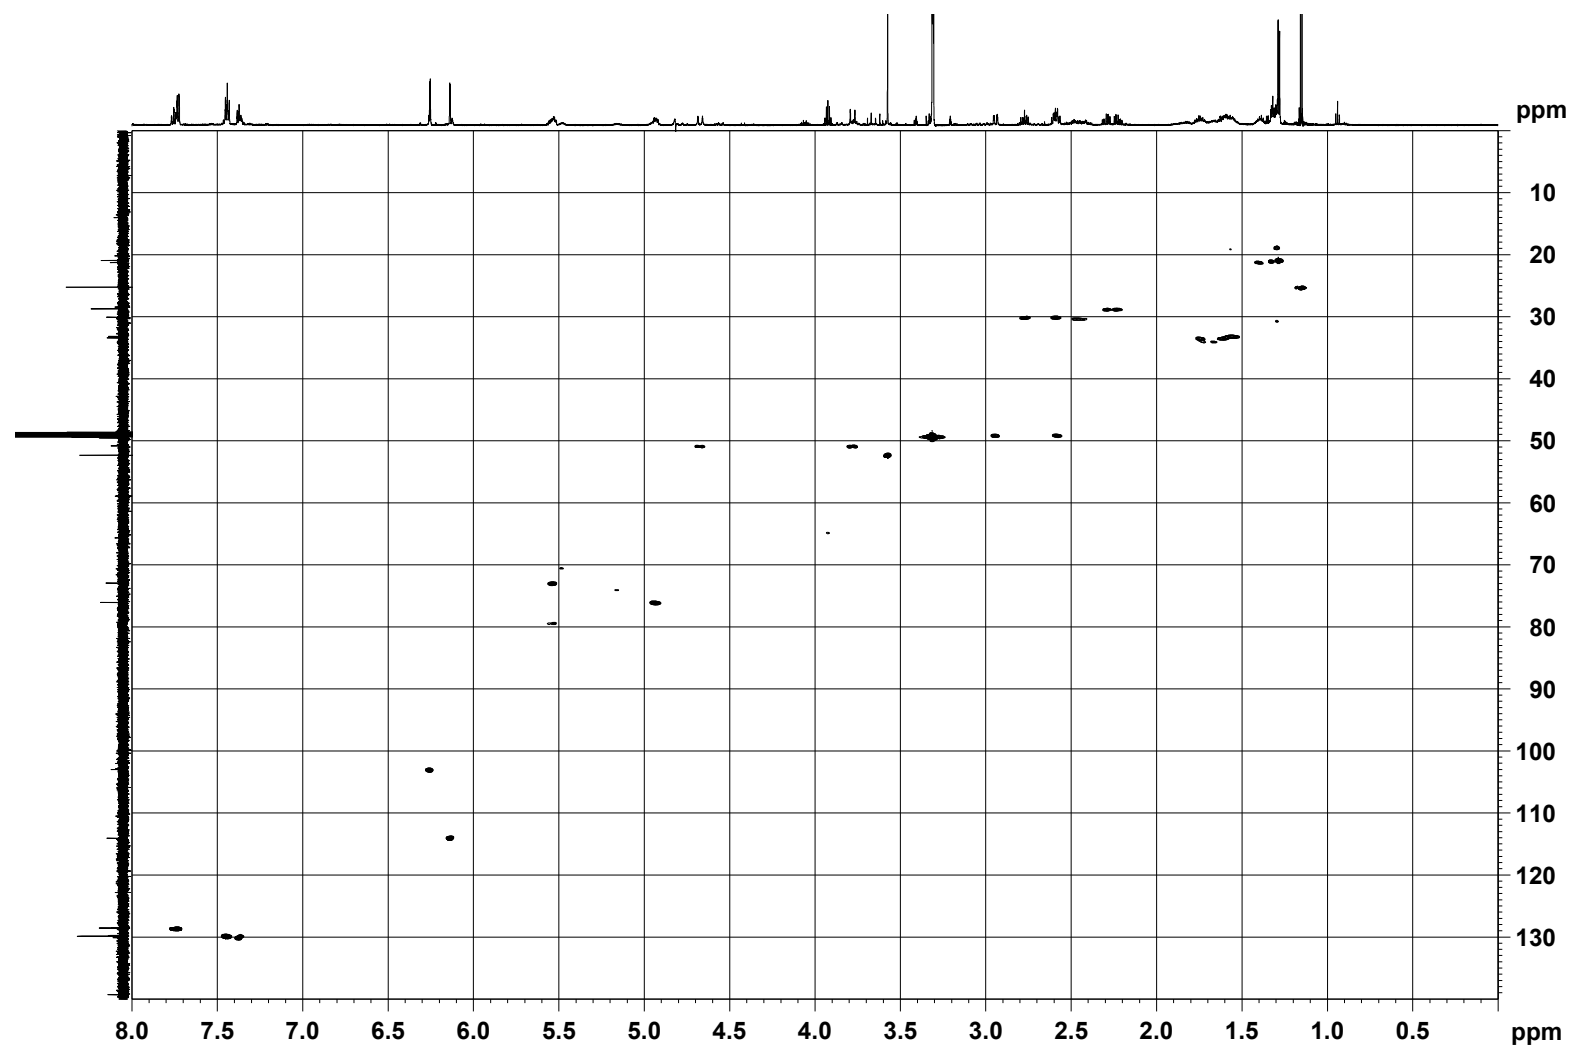

S70. HSQC (700 and 175 MHz,  $\text{CD}_3\text{OD}$ ) spectrum of compound 13.

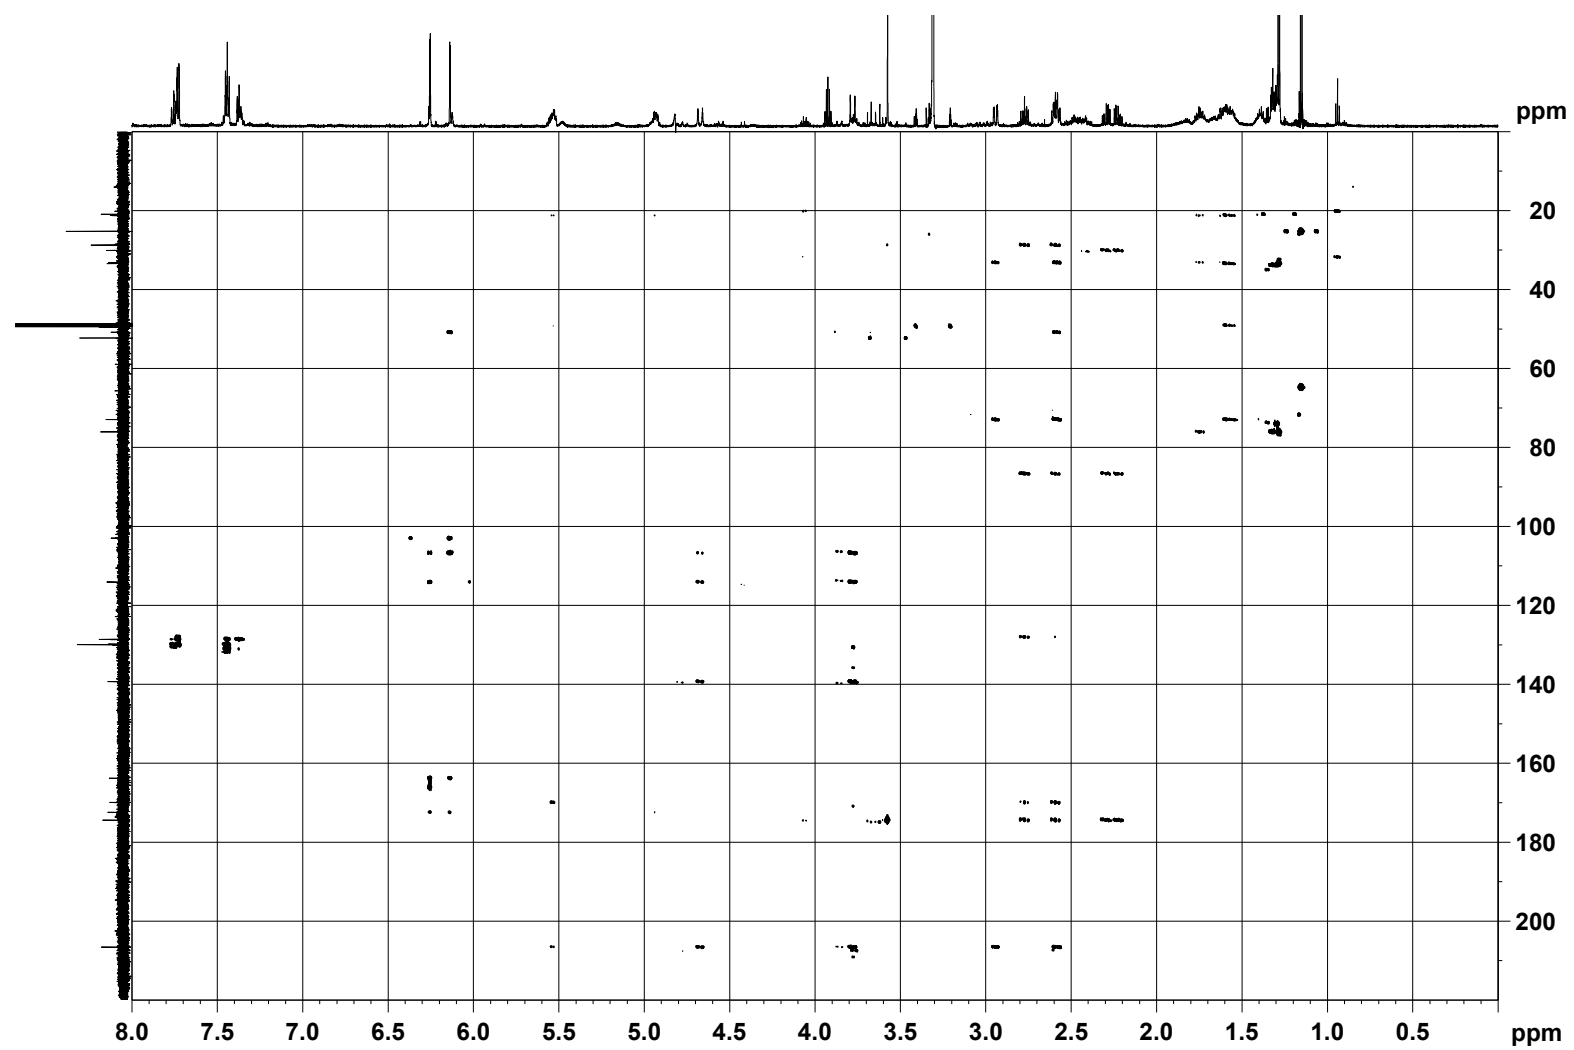

S71. HMBC (700 and 175 MHz,  $\text{CD}_3\text{OD}$ ) spectrum of compound 13.



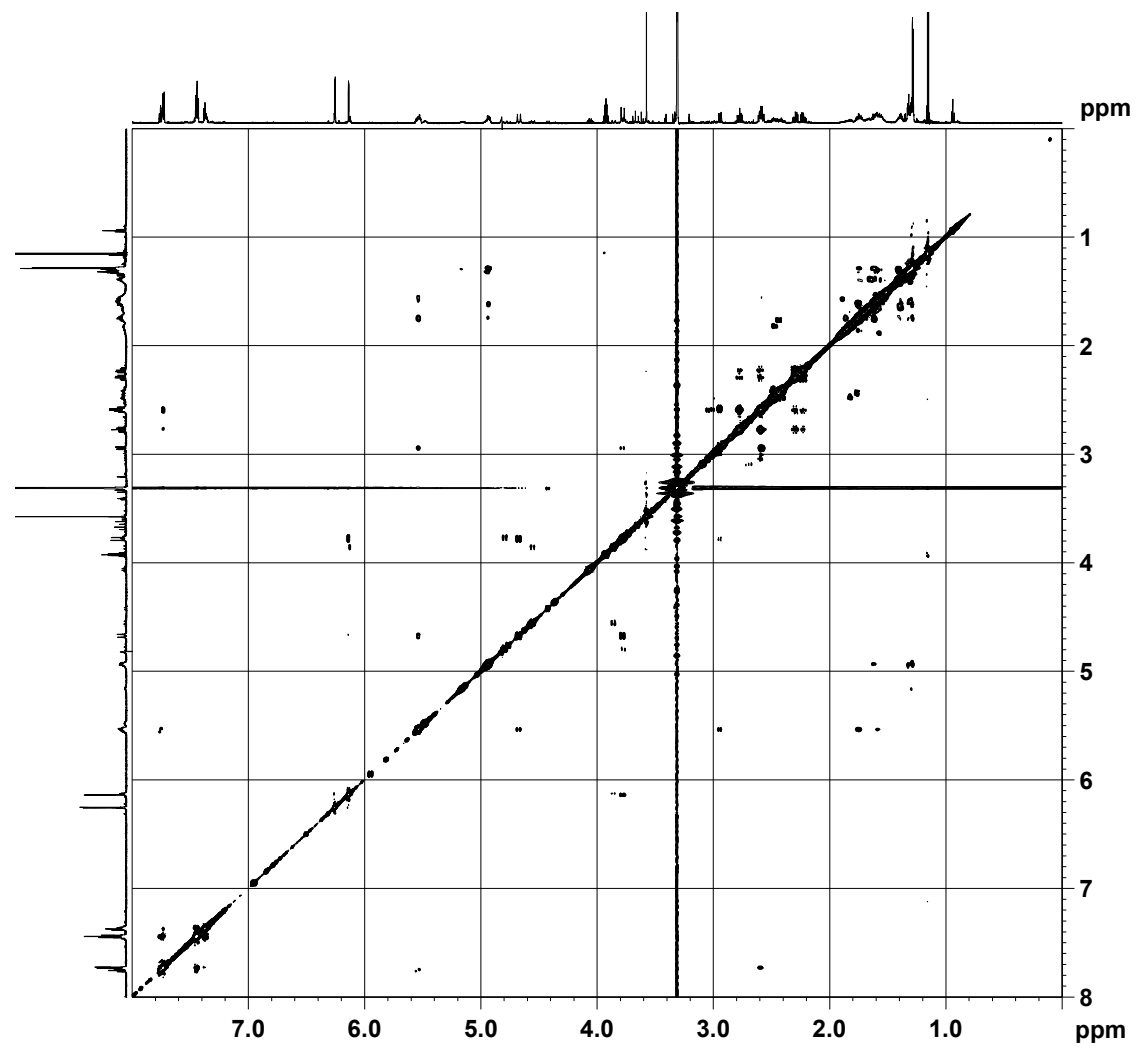

S72. ROESY (700 MHz, CD<sub>3</sub>OD) spectrum of compound 13.

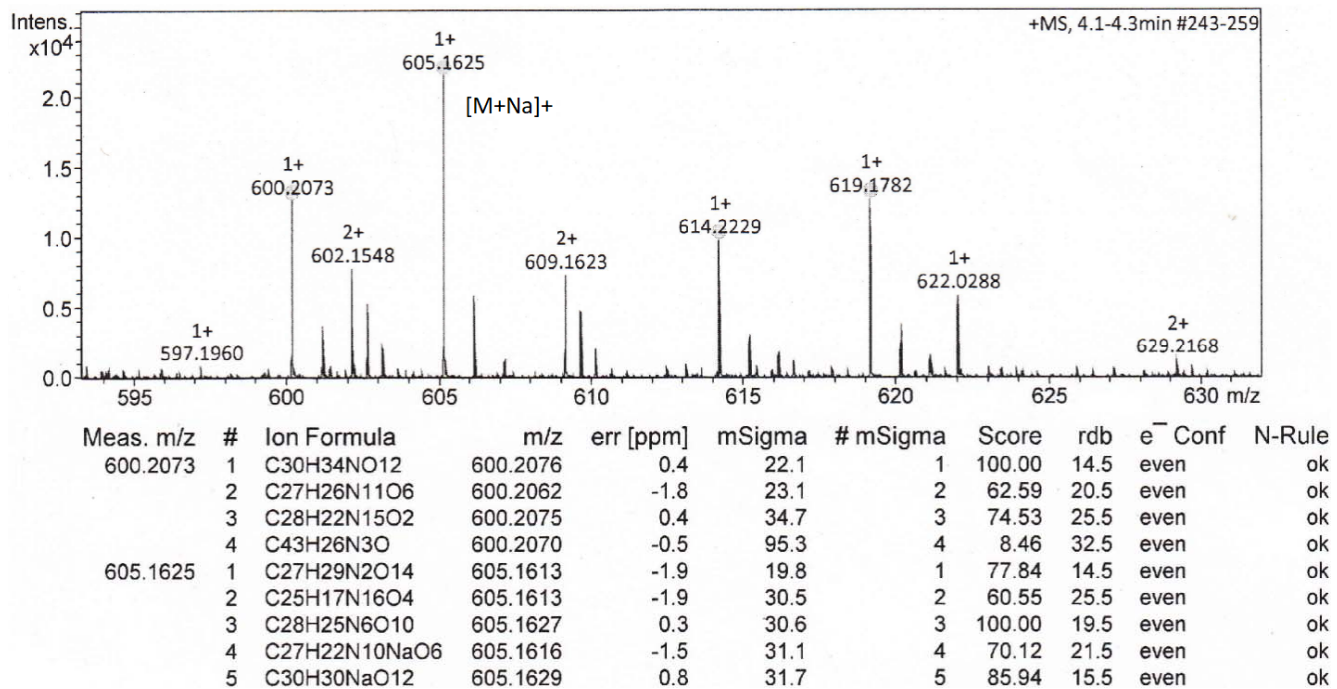

S73. HRESIMS spectrum of compound 14.

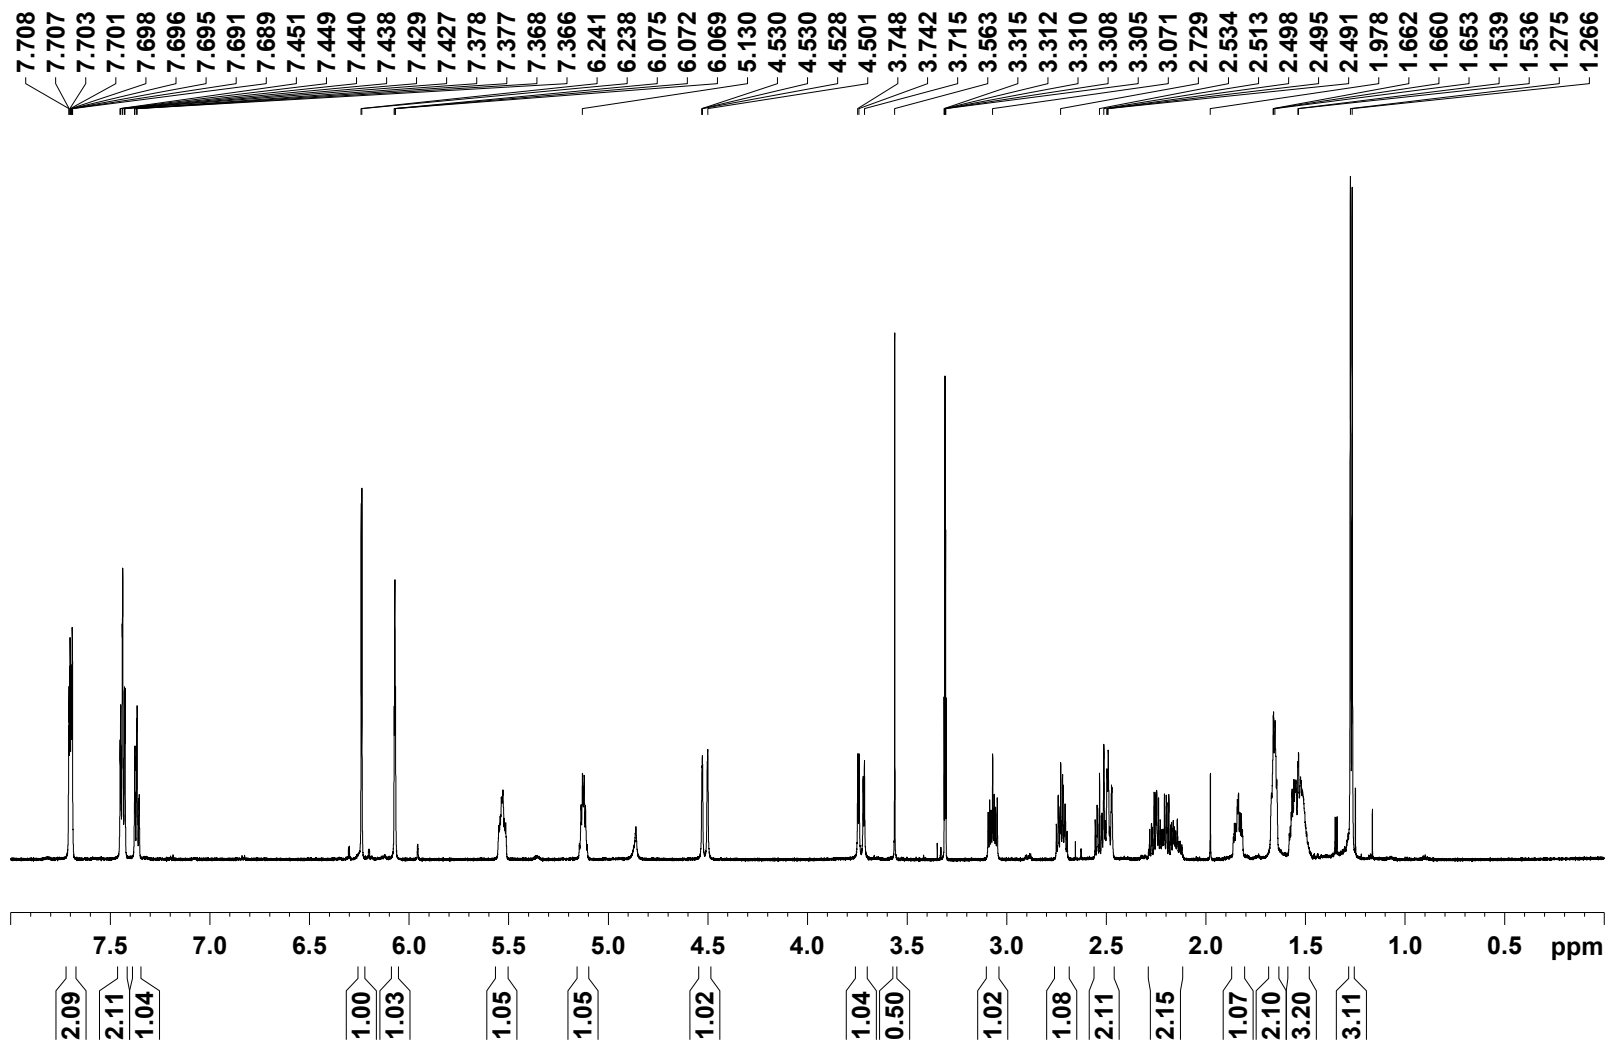

S74.  $^1\text{H}$  NMR (700 MHz,  $\text{CD}_3\text{OD}$ ) spectrum of compound 14.

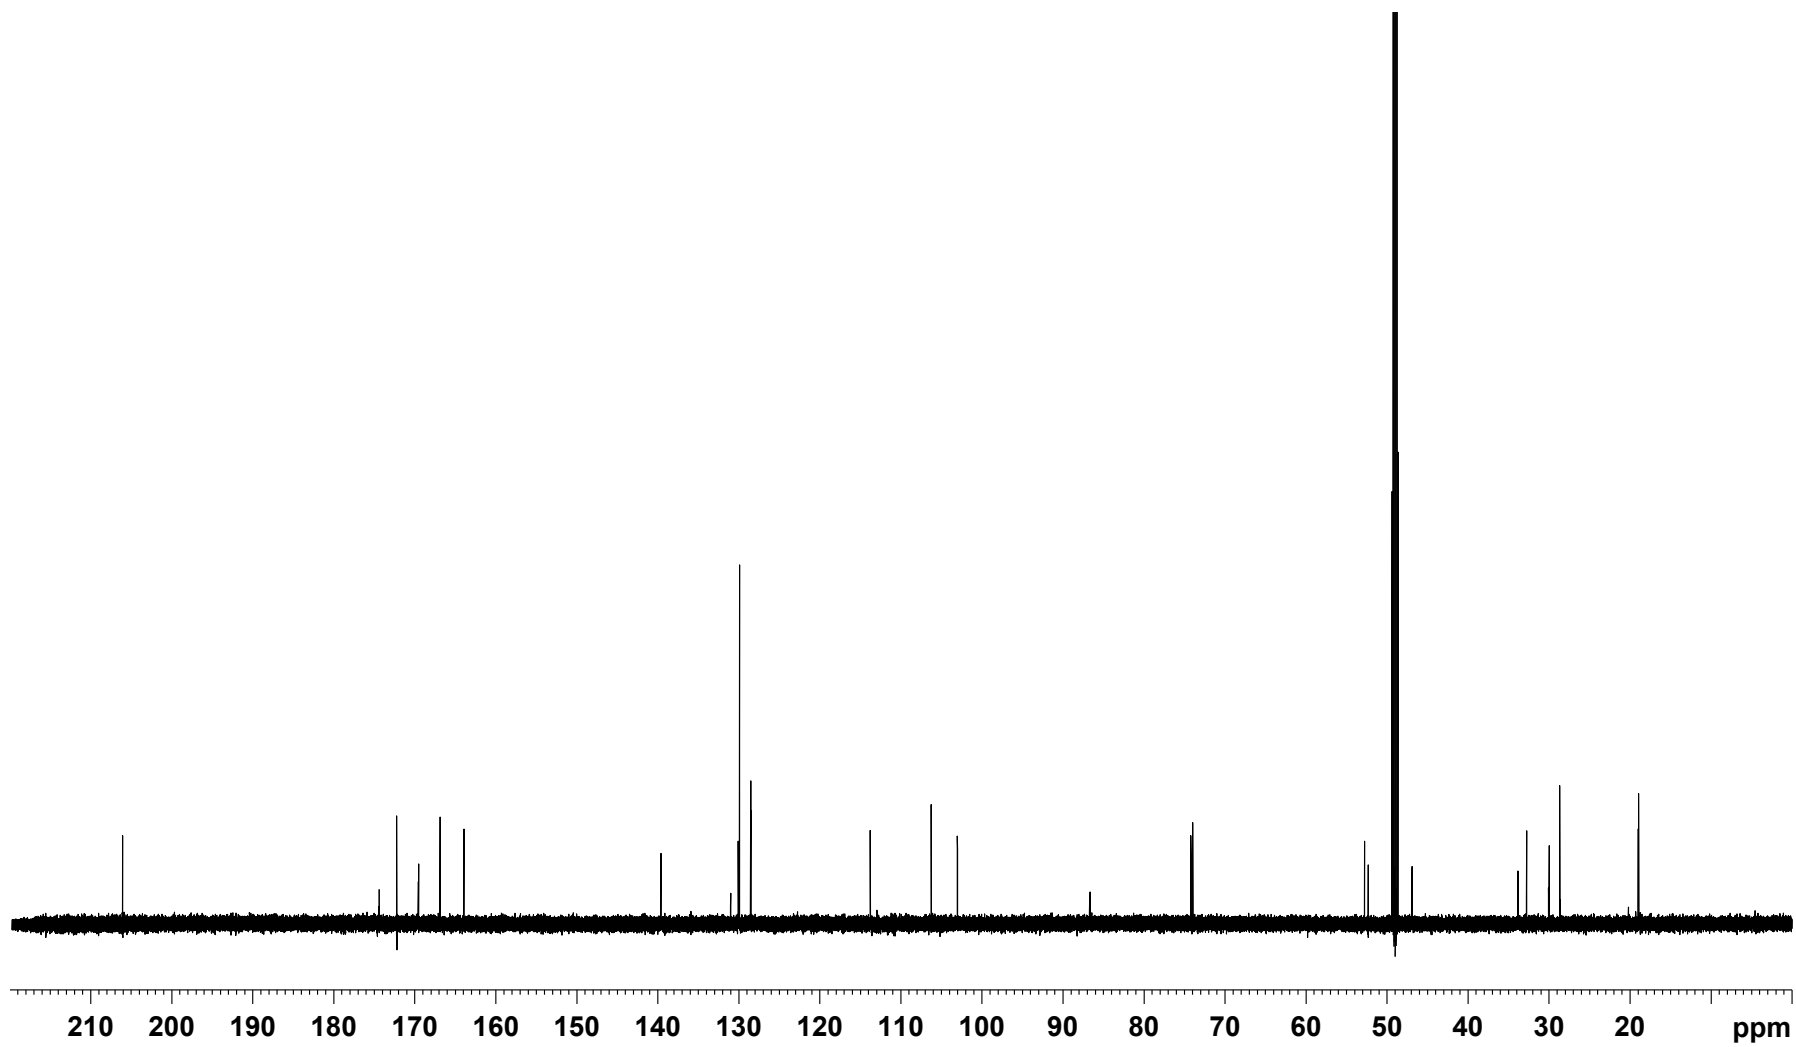

S75.  $^{13}\text{C}$  NMR (175 MHz,  $\text{CD}_3\text{OD}$ ) spectrum of compound 14.

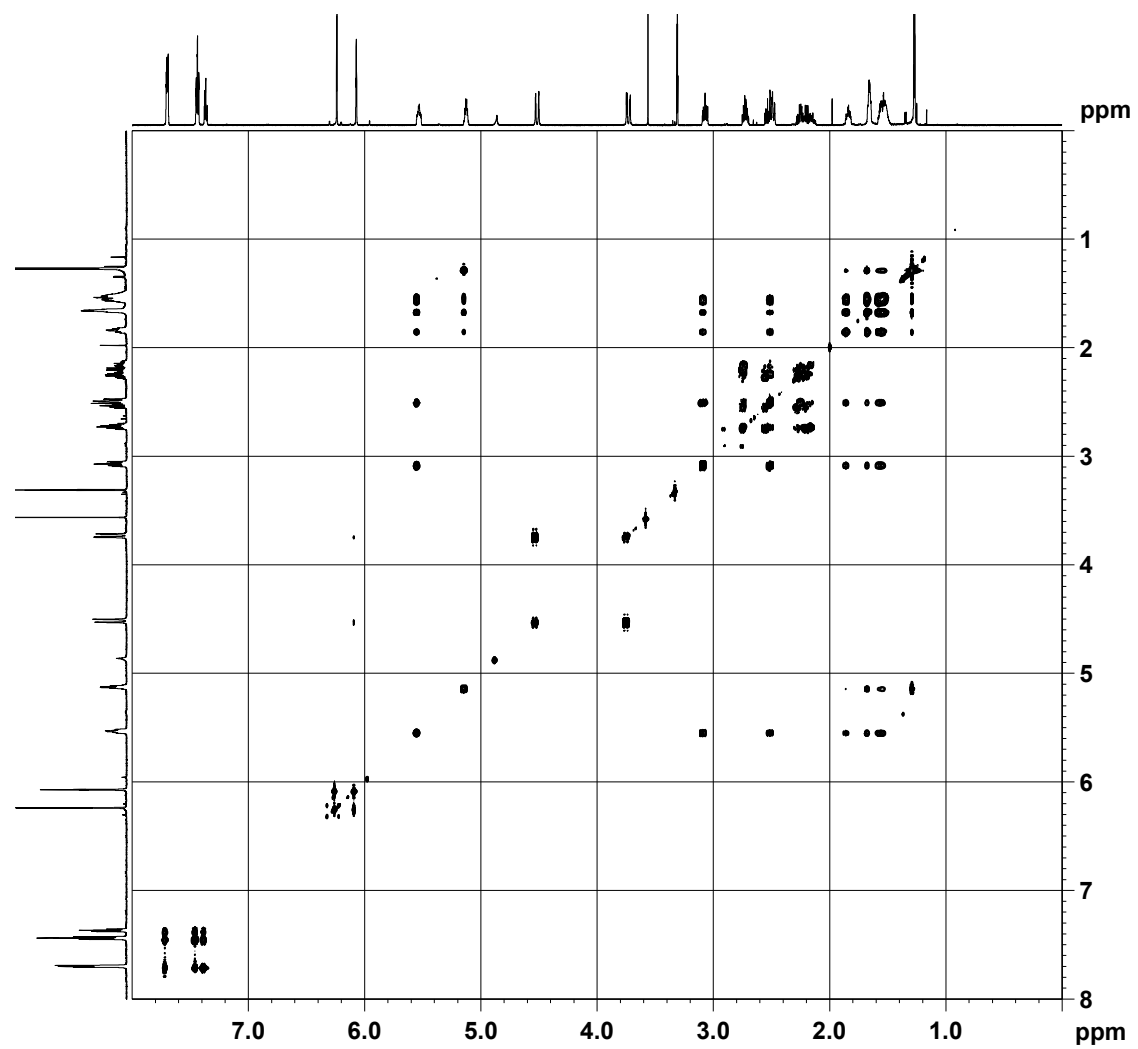

S76.  $^1\text{H}$ - $^1\text{H}$ -TOCSY (700 MHz,  $\text{CD}_3\text{OD}$ ) spectrum of compound 14.

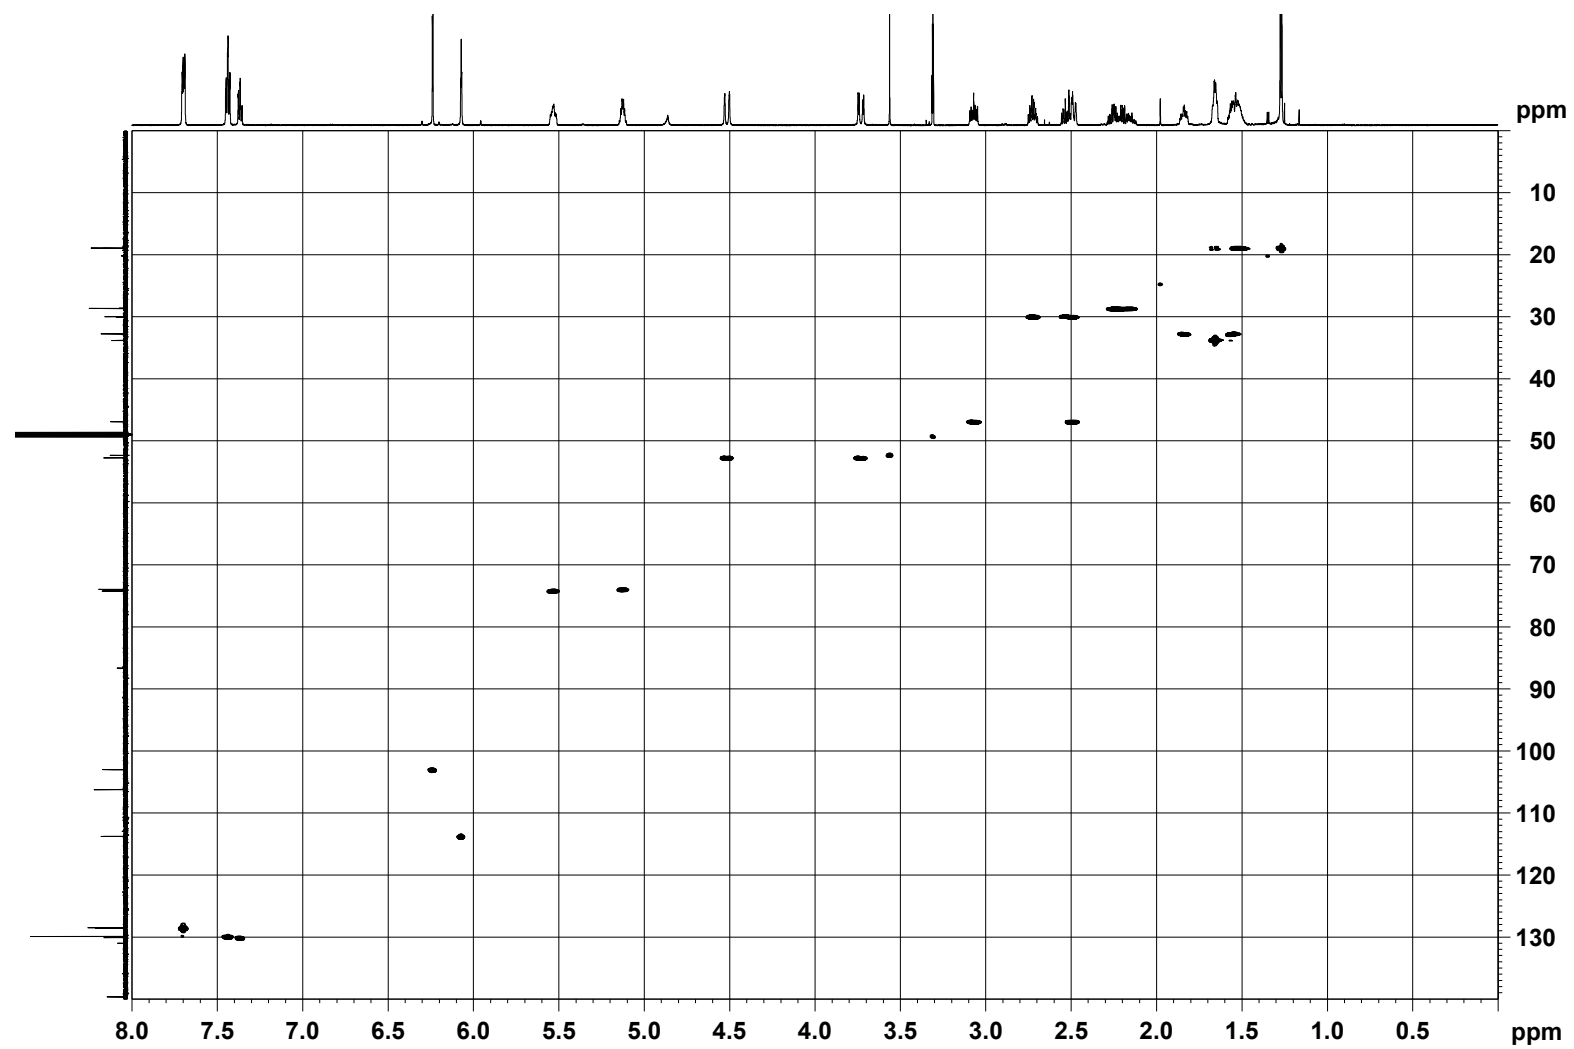

S77. HSQC (700 and 175 MHz, CD<sub>3</sub>OD) spectrum of compound **14**.

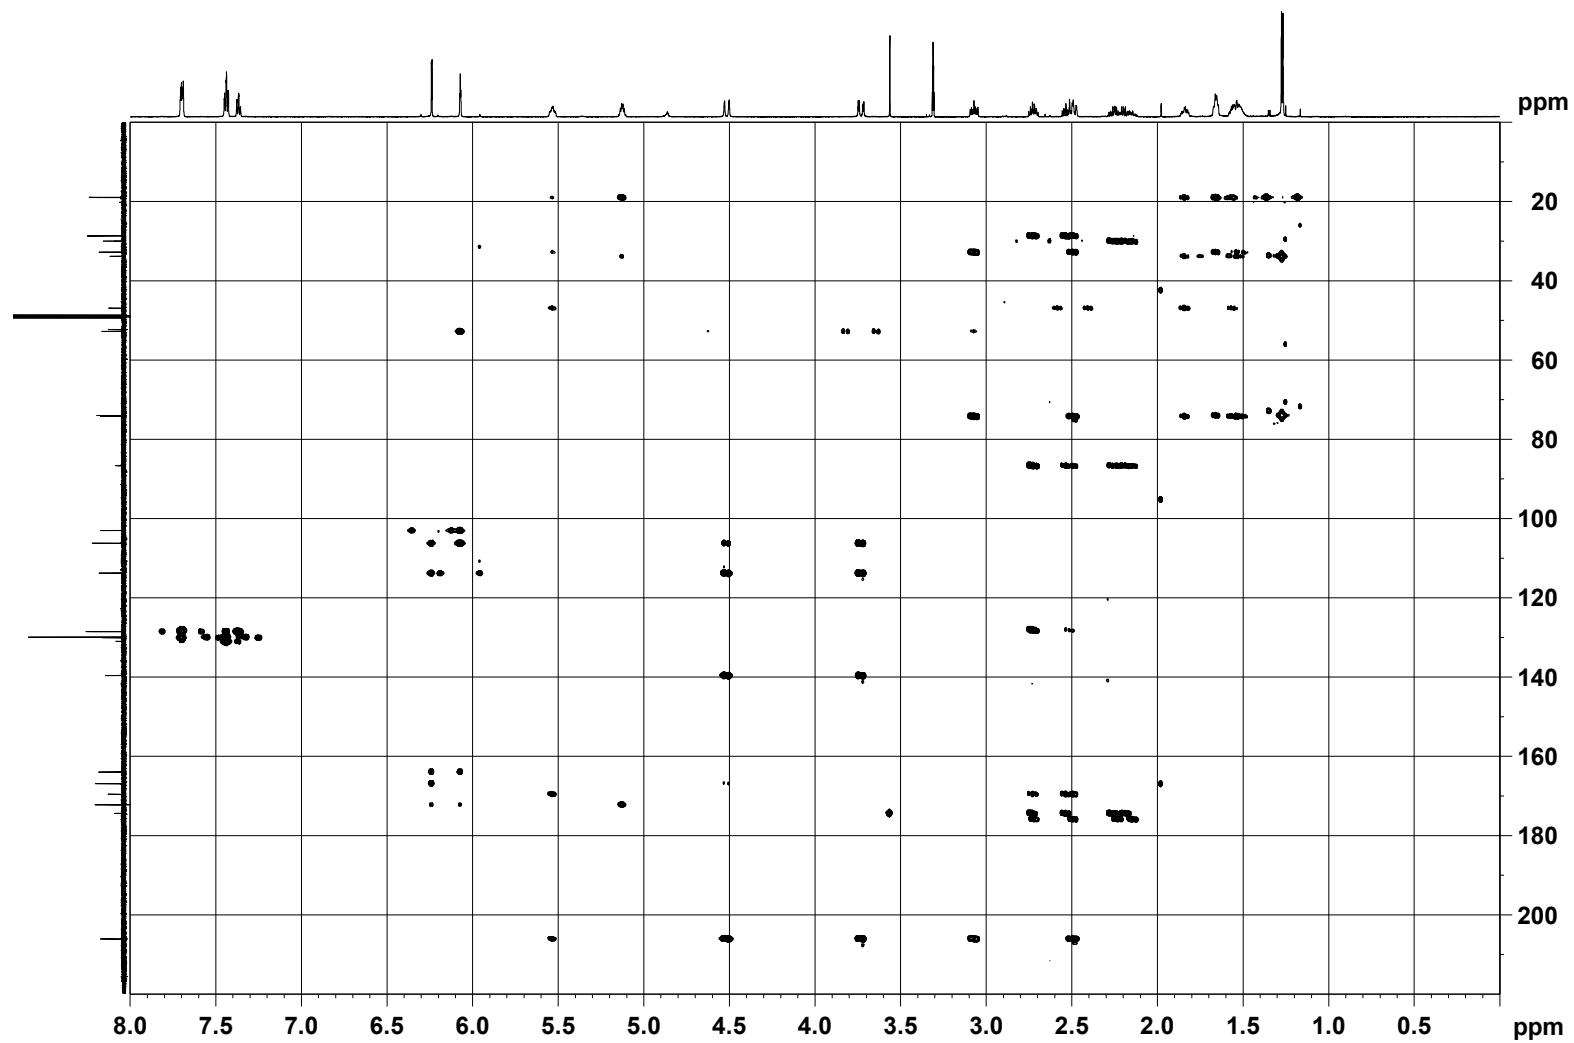

S78. HMBC (700 and 175 MHz,  $\text{CD}_3\text{OD}$ ) spectrum of compound 14.

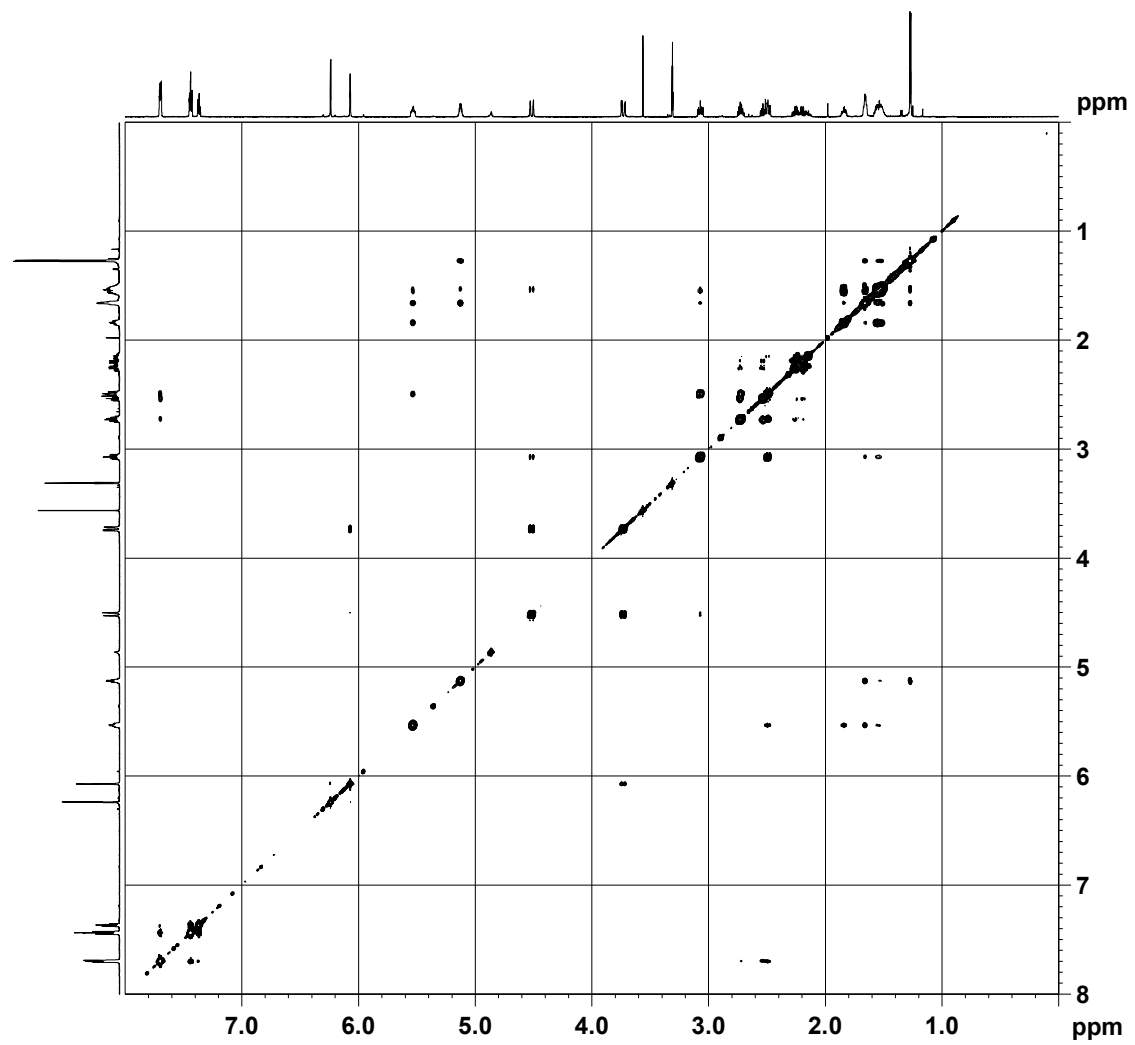

S79. ROESY (700 MHz, CD<sub>3</sub>OD) spectrum of compound 14.



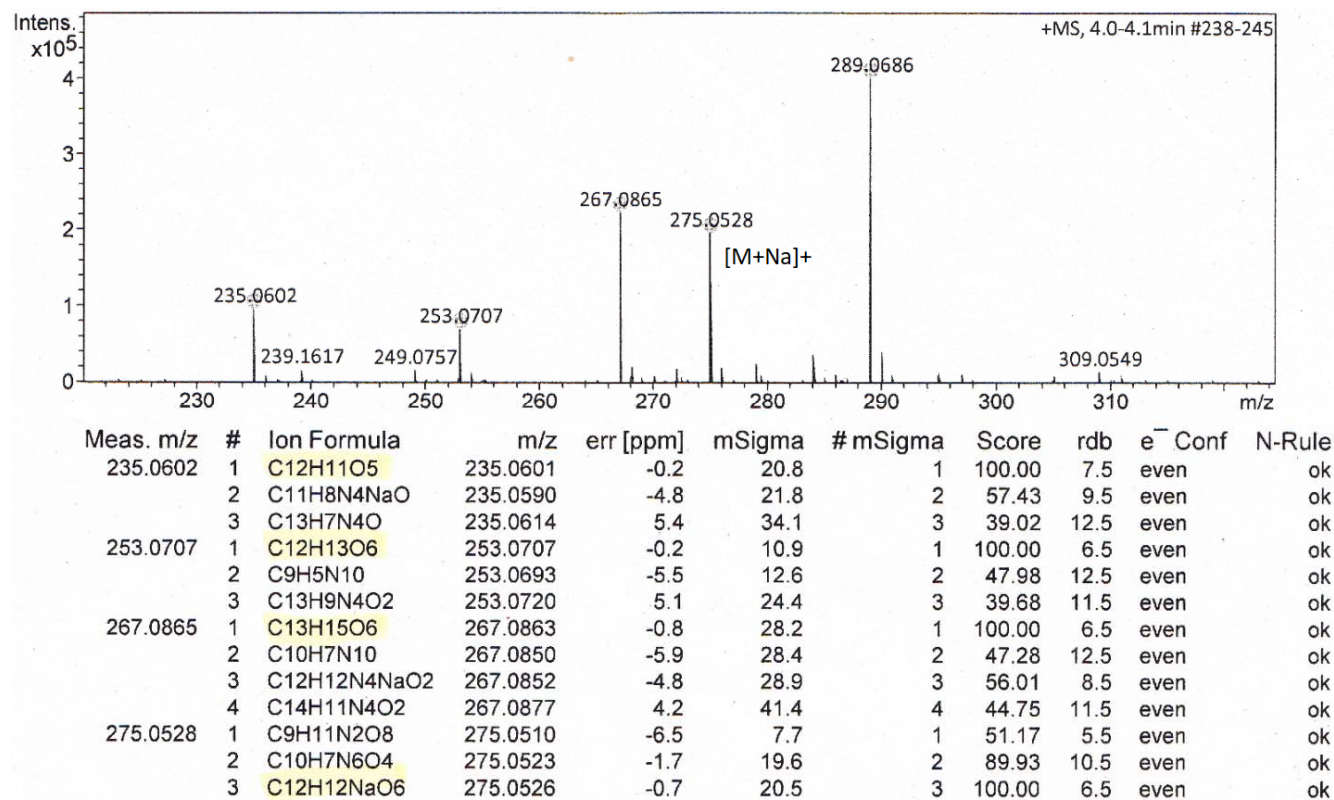

S80. HRESIMS spectrum of compound 15.

Tal80CS6-3

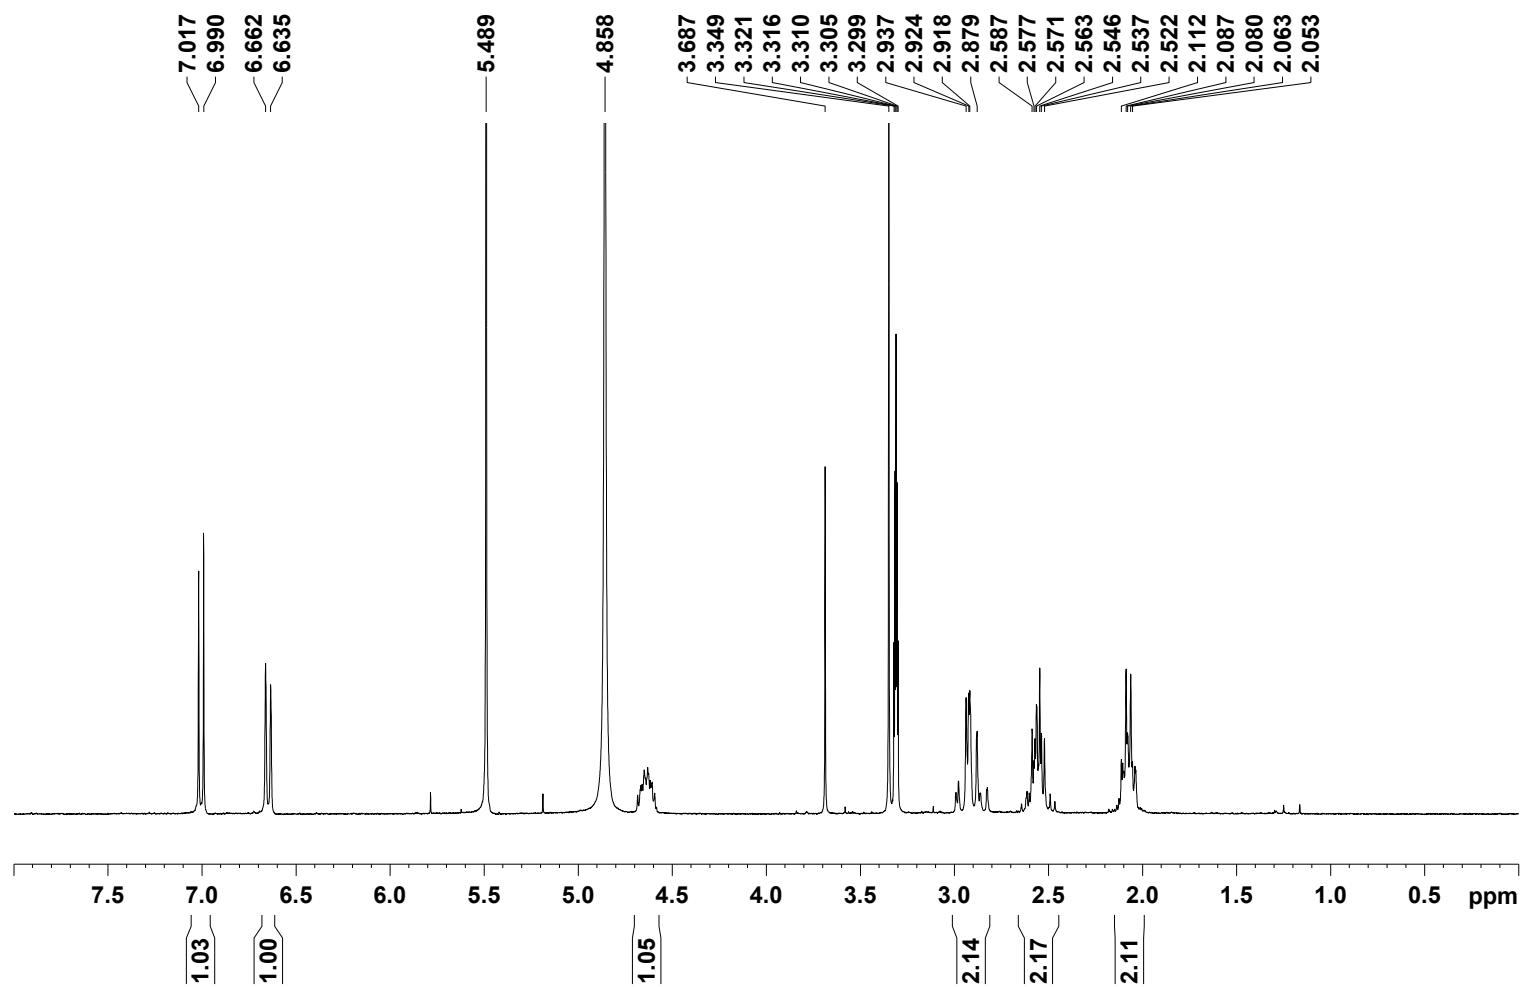

S81.  $^1\text{H}$  NMR (300 MHz,  $\text{CD}_3\text{OD}$ ) spectrum of compound 15.

Tal80ES6-3

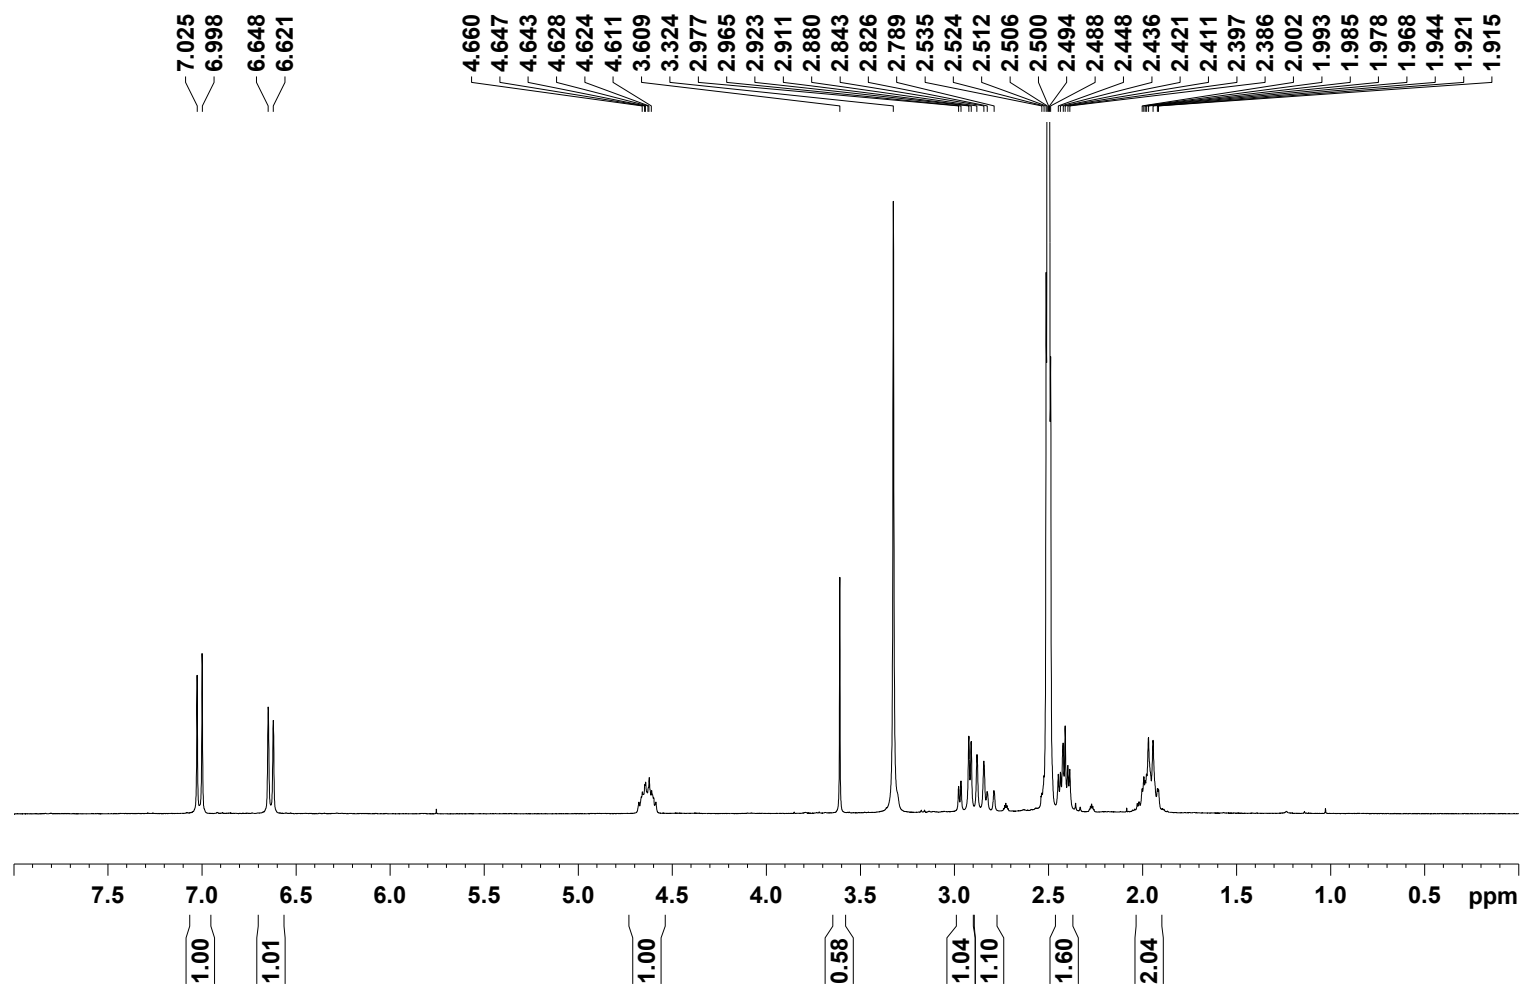

S82.  $^1\text{H}$  NMR (300 MHz,  $\text{DMSO-}d_6$ ) spectrum of compound 15.

Tal80Es6-3

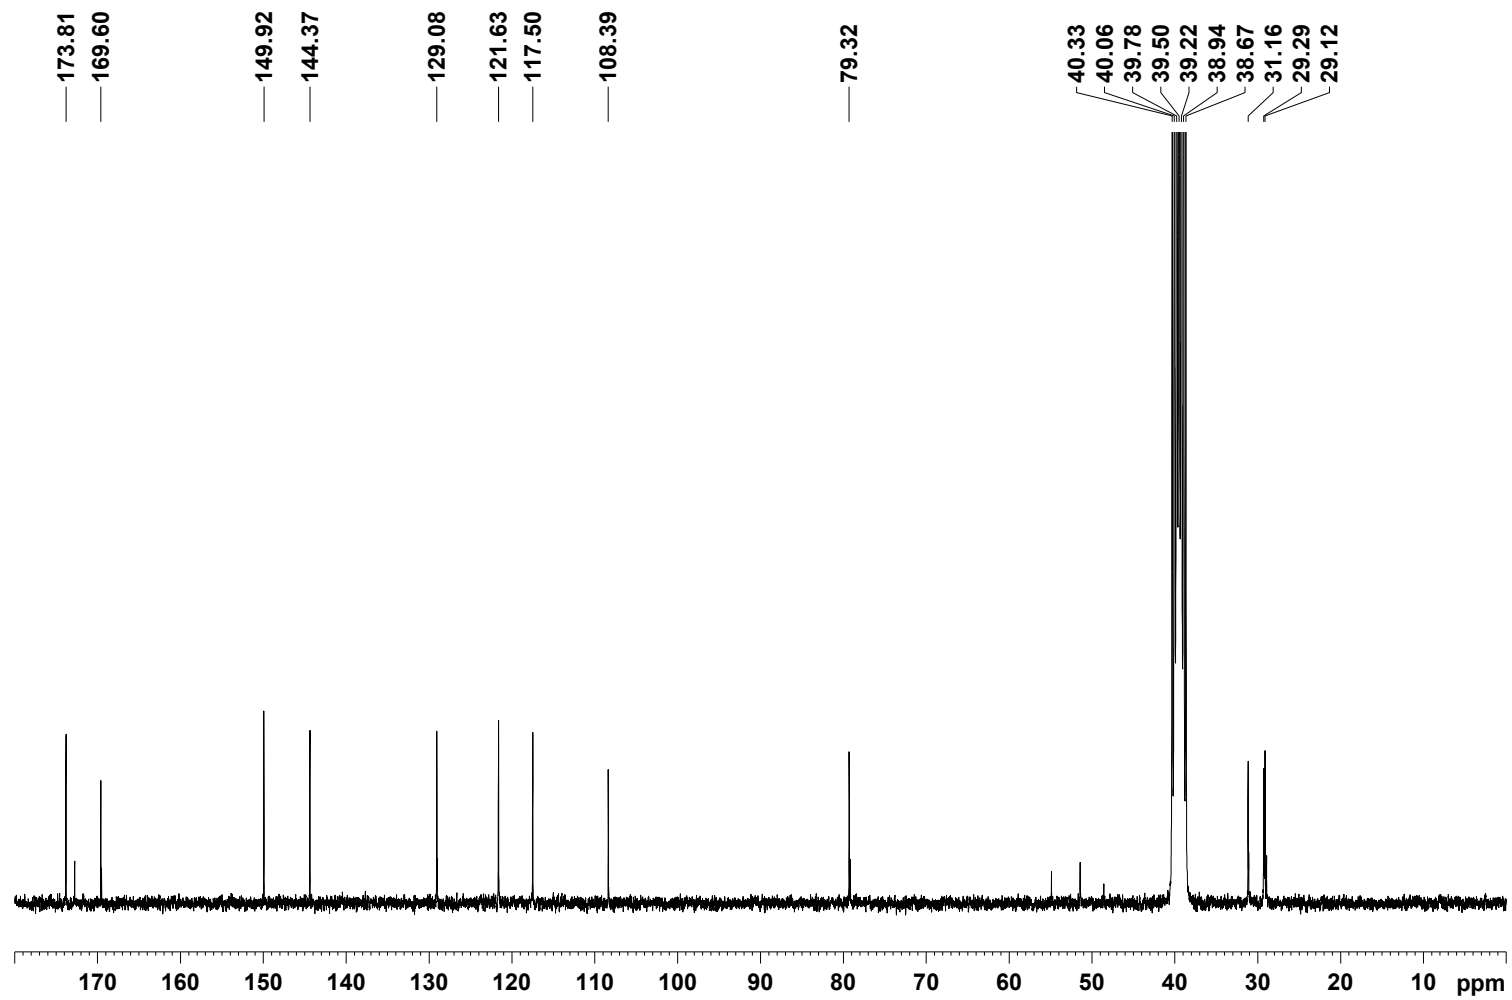

S83.  $^{13}\text{C}$  NMR (75 MHz,  $\text{DMSO-}d_6$ ) spectrum of compound 15.

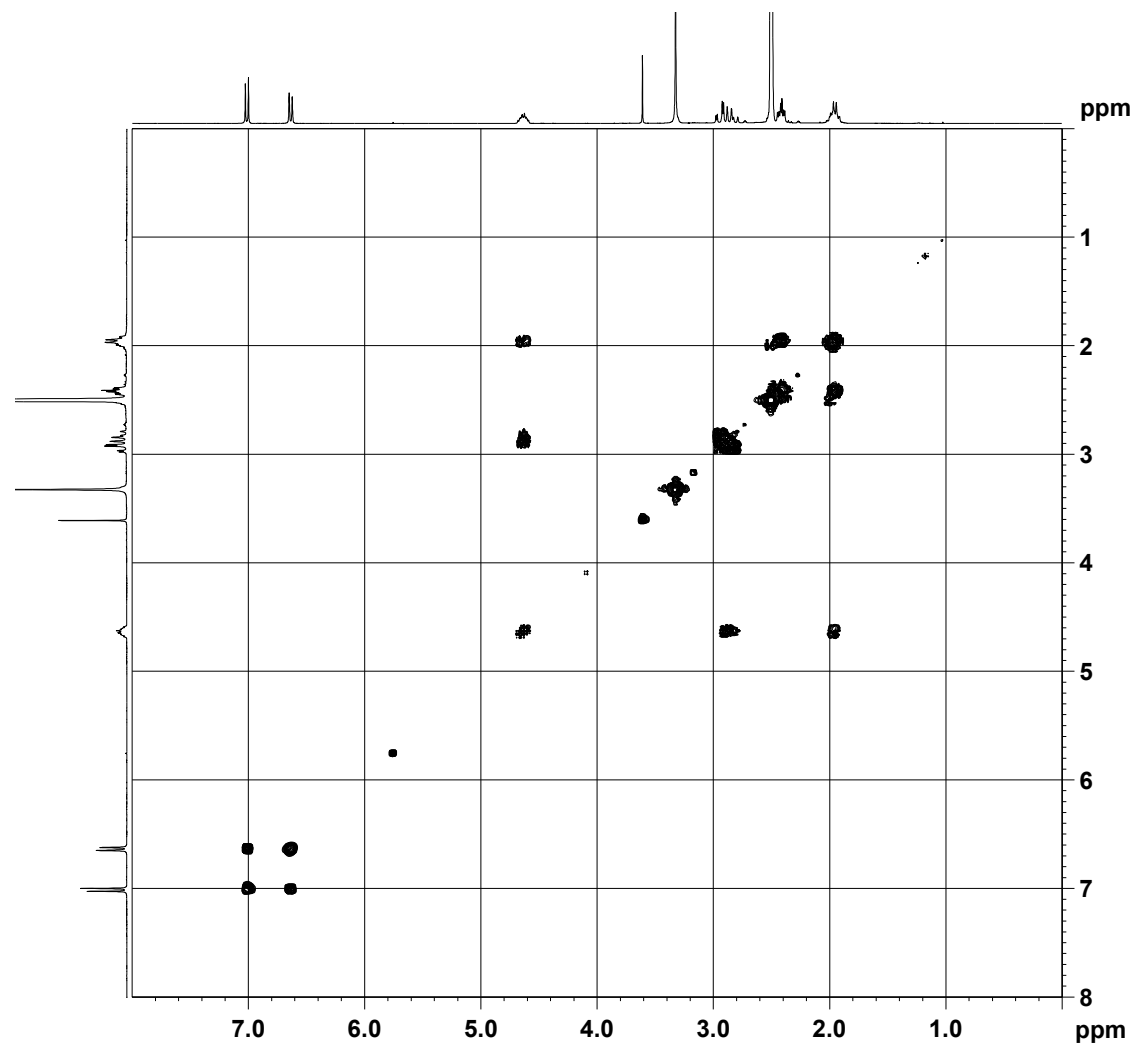

S84.  $^1\text{H}$ - $^1\text{H}$  COSY (300 MHz,  $\text{DMSO-}d_6$ ) spectrum of compound **15**.

Tal80ES6-3

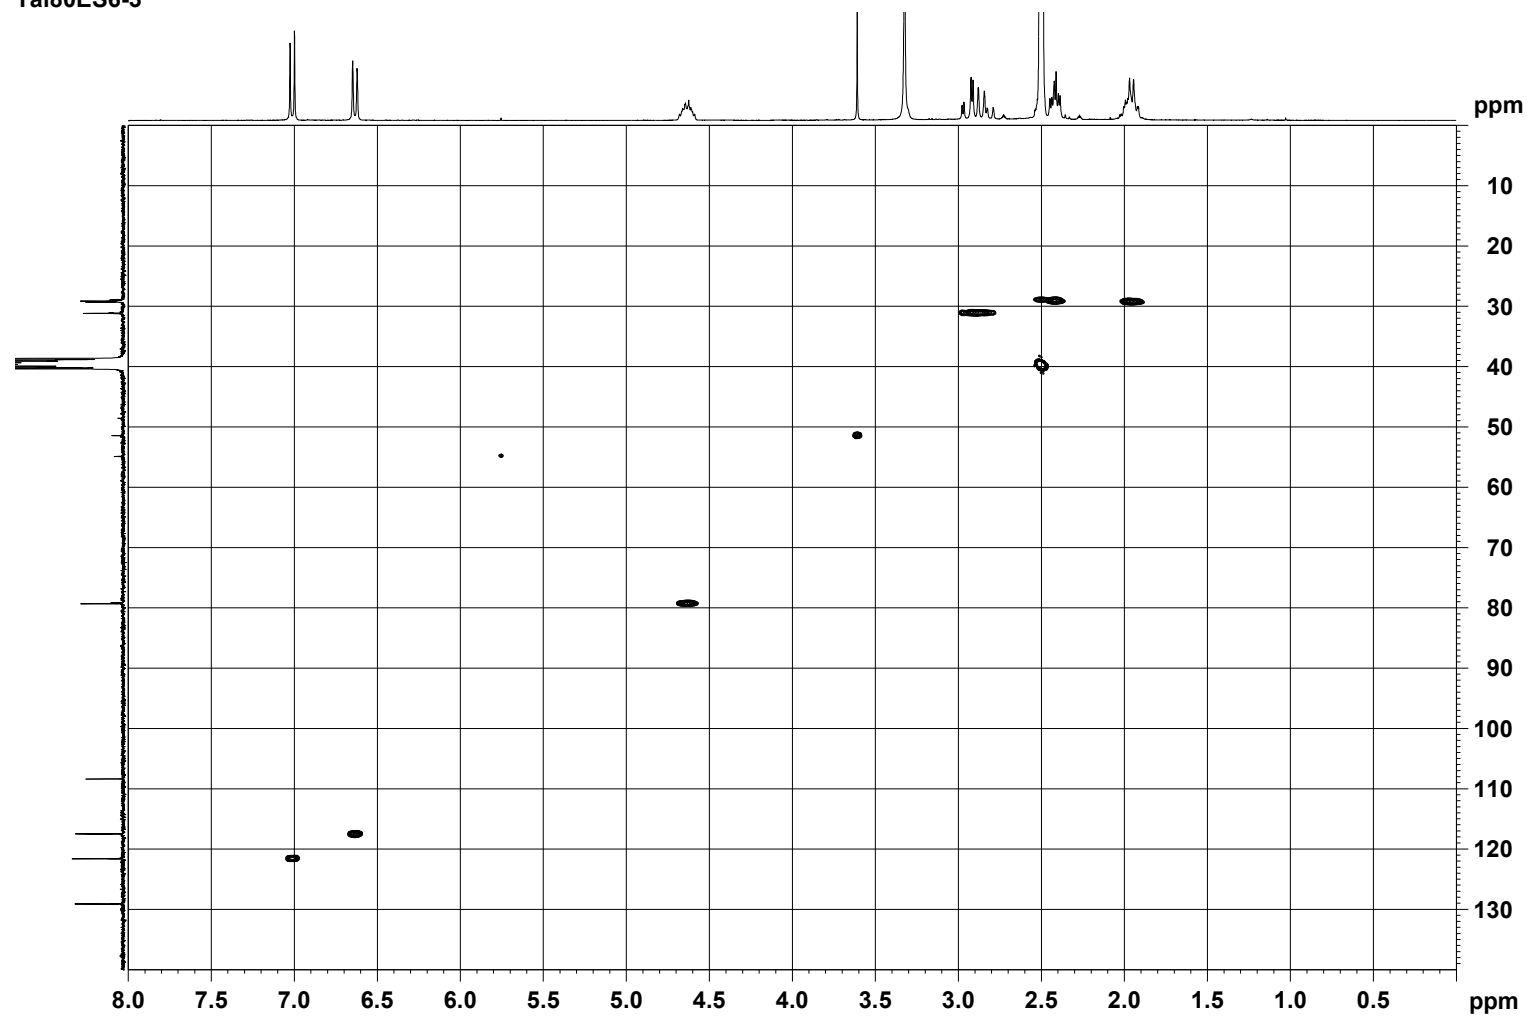

S85. HSQC (300 and 75 MHz,  $\text{DMSO}-d_6$ ) spectrum of compound **15**.

Tal80ES6-3

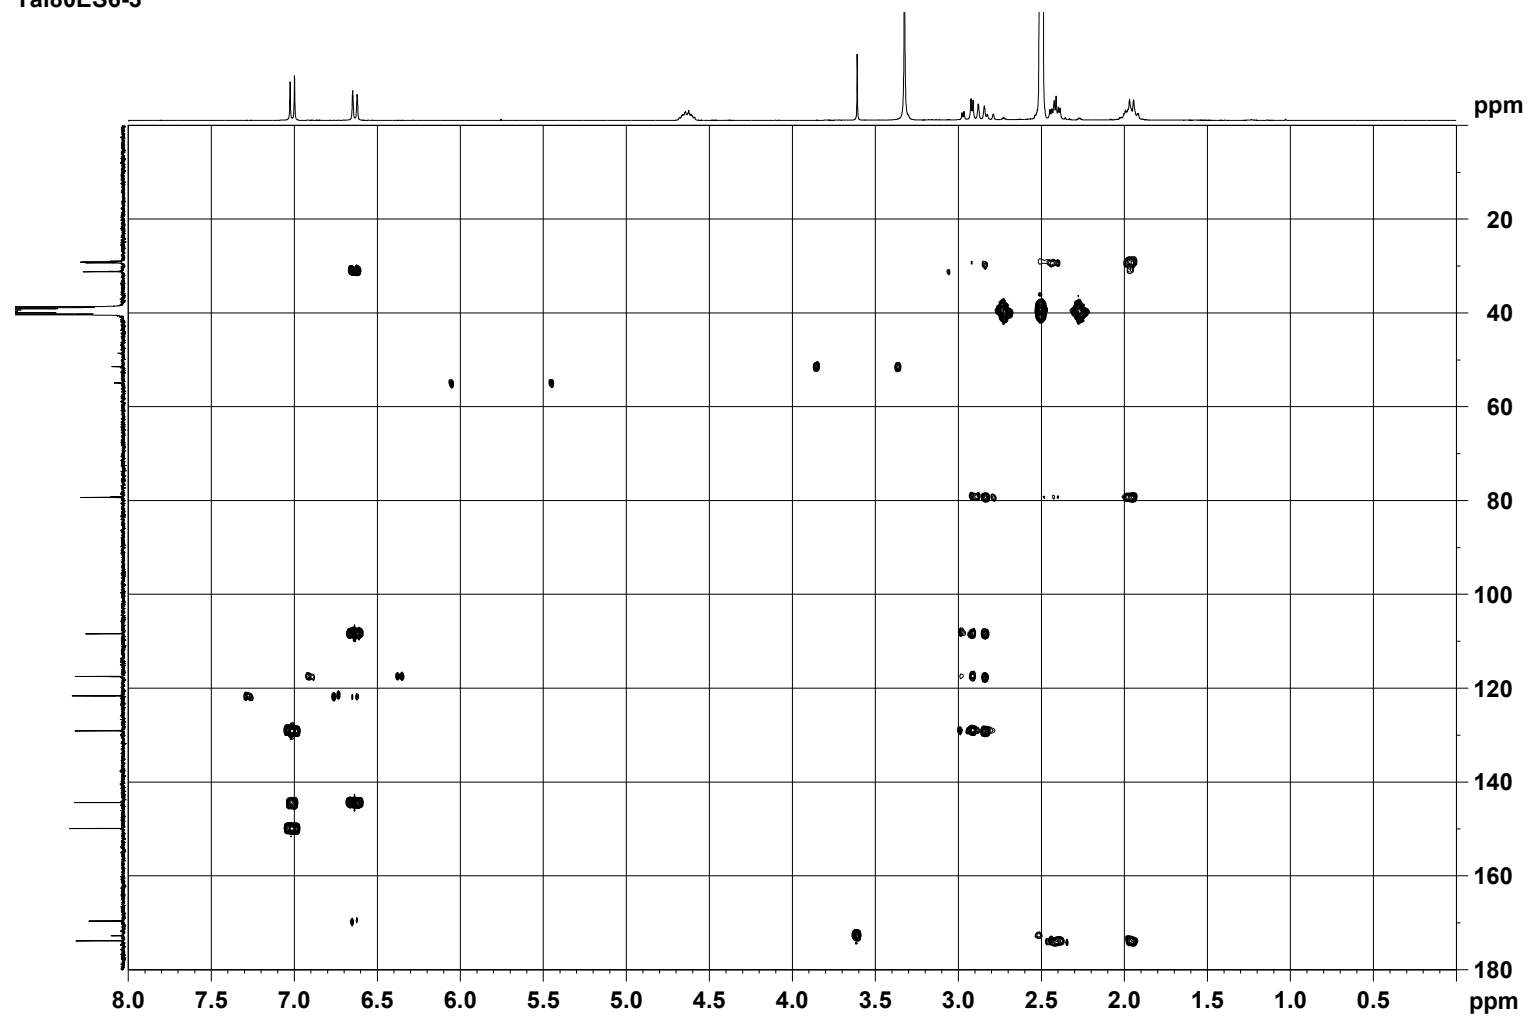

S86. HMBC (300 and 75 MHz,  $\text{DMSO}-d_6$ ) spectrum of compound 15.

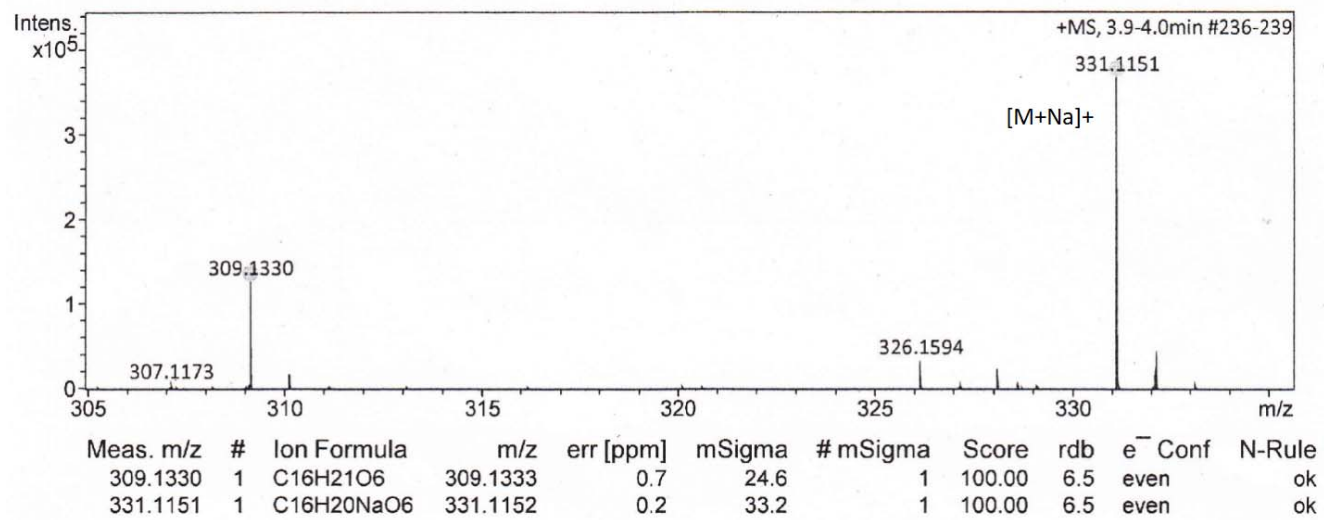

**S87.** HRESIMS spectrum of compound **16**.



Tal60ES5-3-1

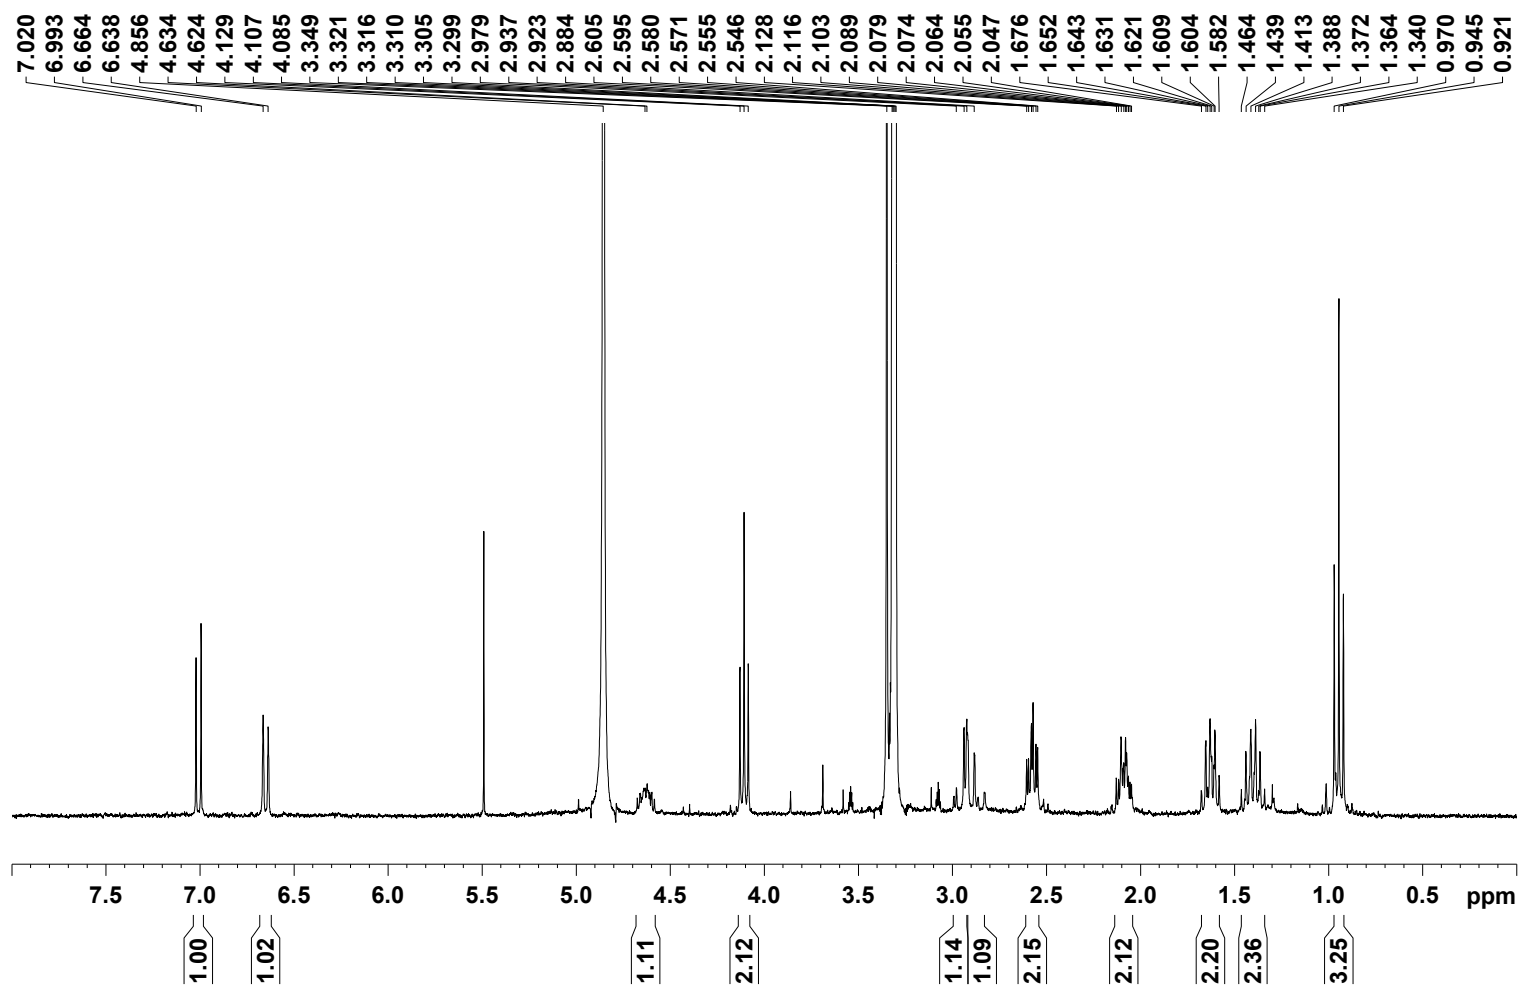

S88.  $^1\text{H}$  NMR (300 MHz,  $\text{CD}_3\text{OD}$ ) spectrum of compound 16.

Tal60ES5-3-1

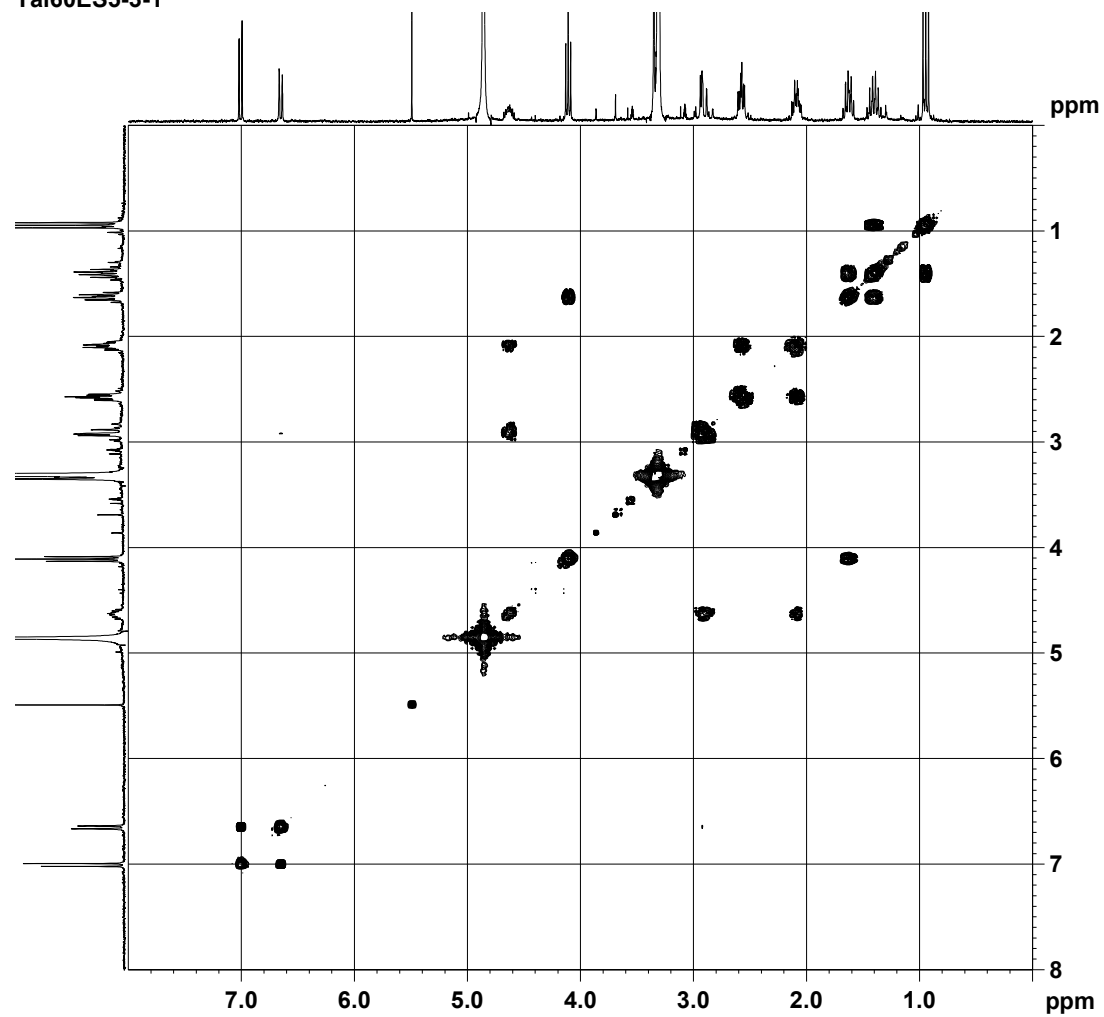

S89. <sup>1</sup>H-<sup>1</sup>H COSY (300 MHz, CD<sub>3</sub>OD) spectrum of compound 16.

Tal60ES5-3-1

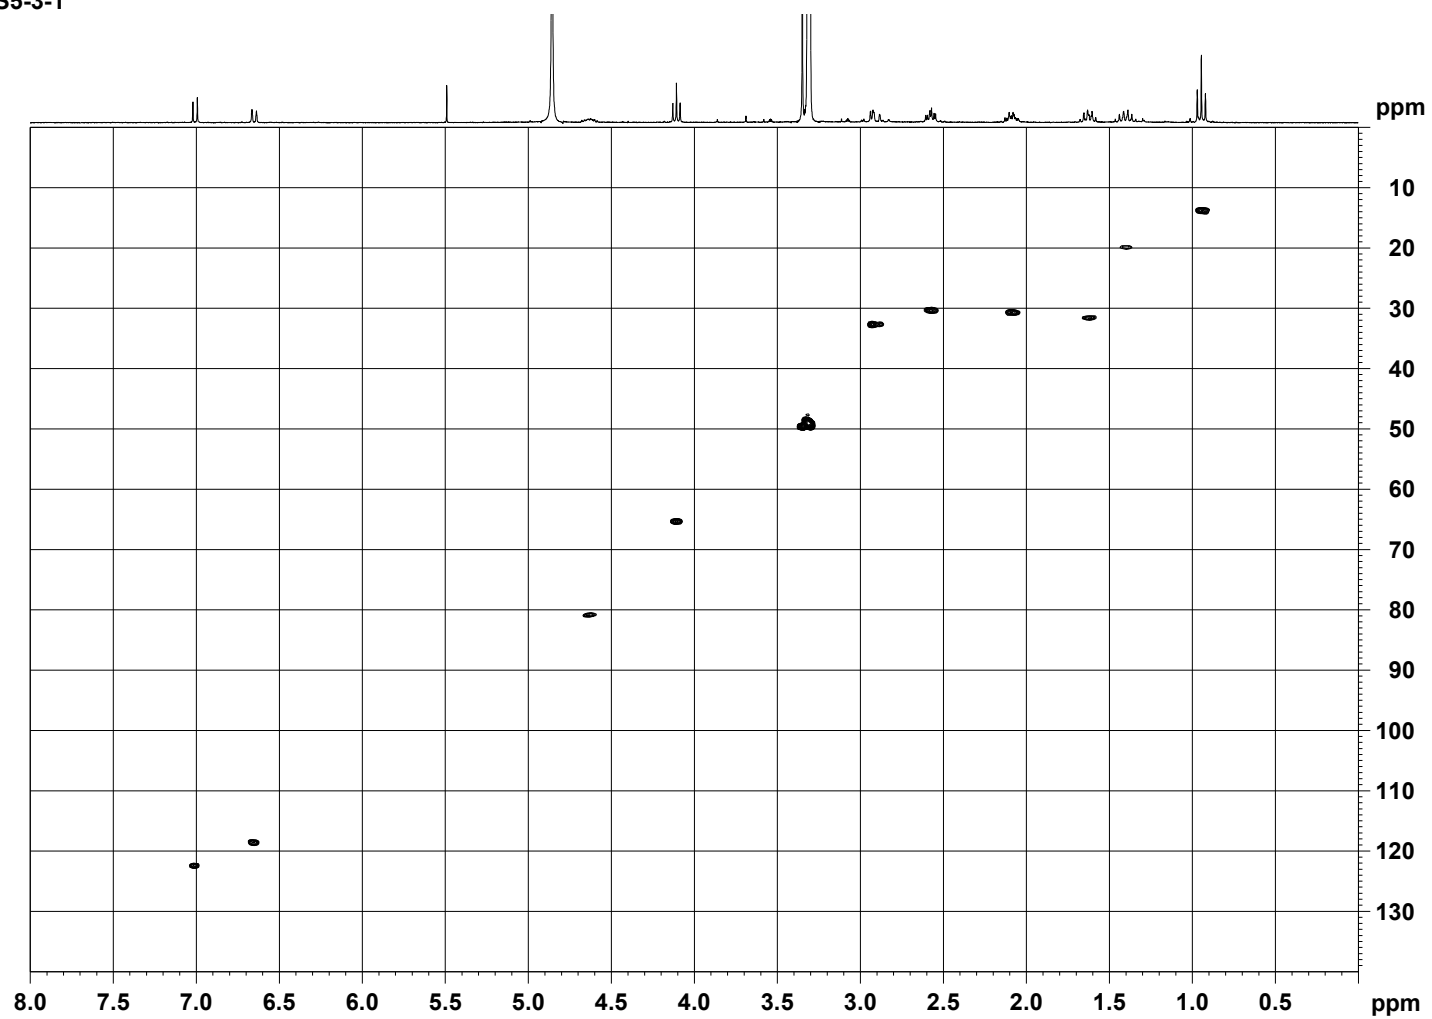

S90. HSQC (300 and 75 MHz, CD<sub>3</sub>OD) spectrum of compound 16.

Tal60ES5-3-1

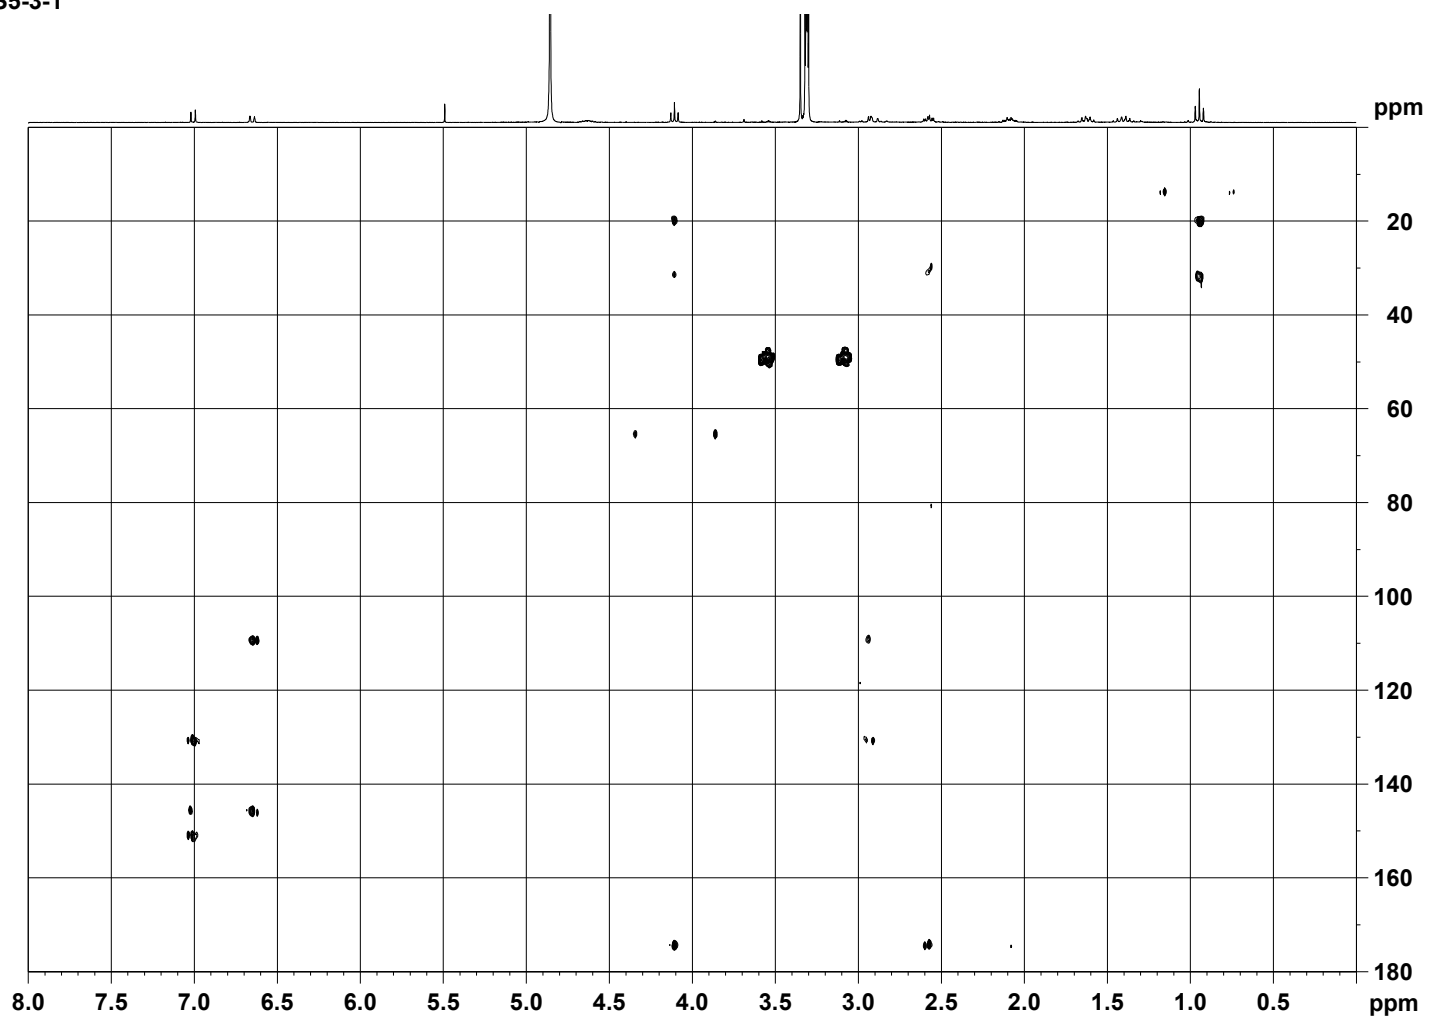

S91. HMBC (300 and 75 MHz,  $\text{CD}_3\text{OD}$ ) spectrum of compound 16.

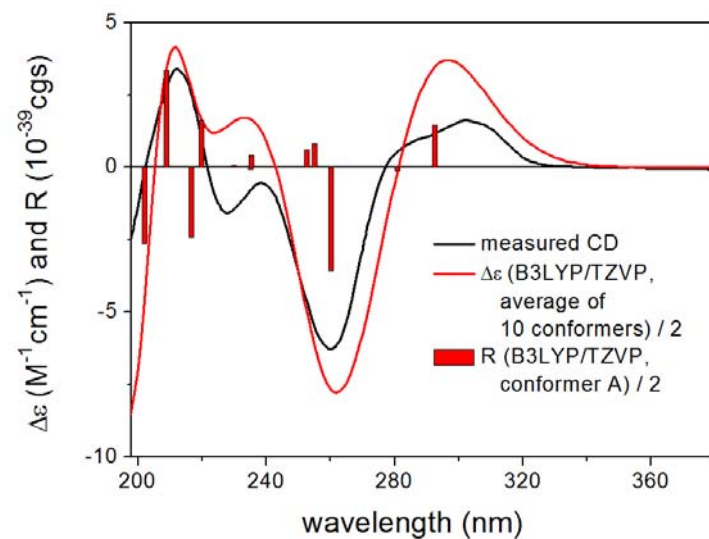

**S92.** Experimental ECD spectrum of **9** in MeCN compared with the Boltzmann-weighted B3LYP/TZVP PCM/MeCN ECD spectrum of (3*S*,7*S*)-**9** computed for the B97D/TZVP PCM/MeCN conformers. Bars represent the rotational strength values of the lowest-energy conformer.

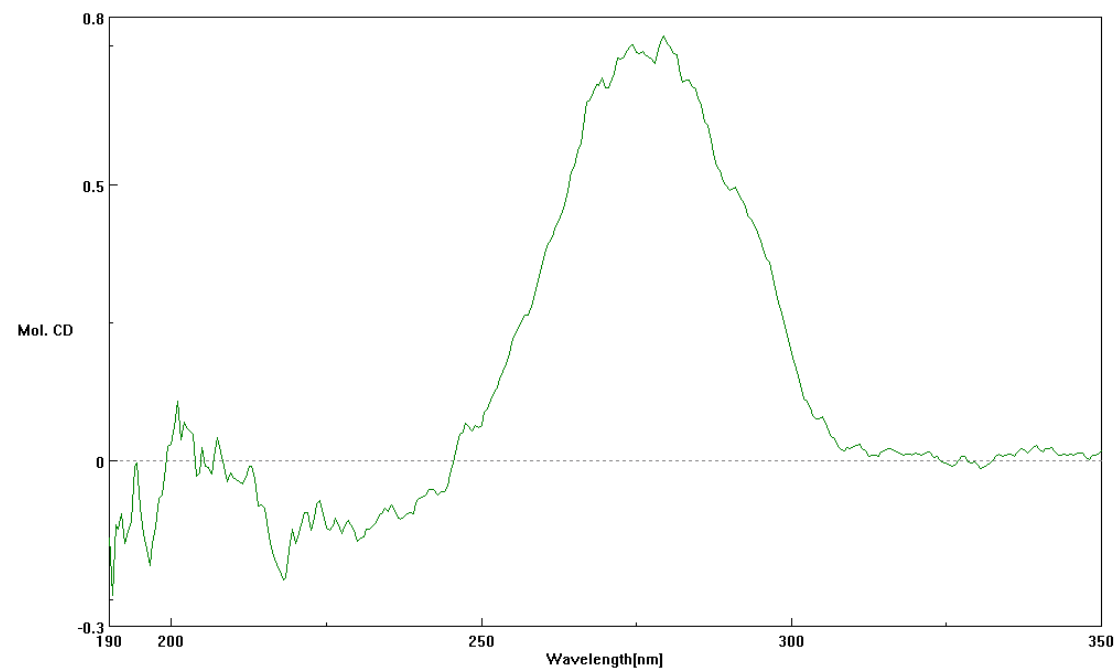

**S93.** Experimental ECD spectrum of **1** in MeCN

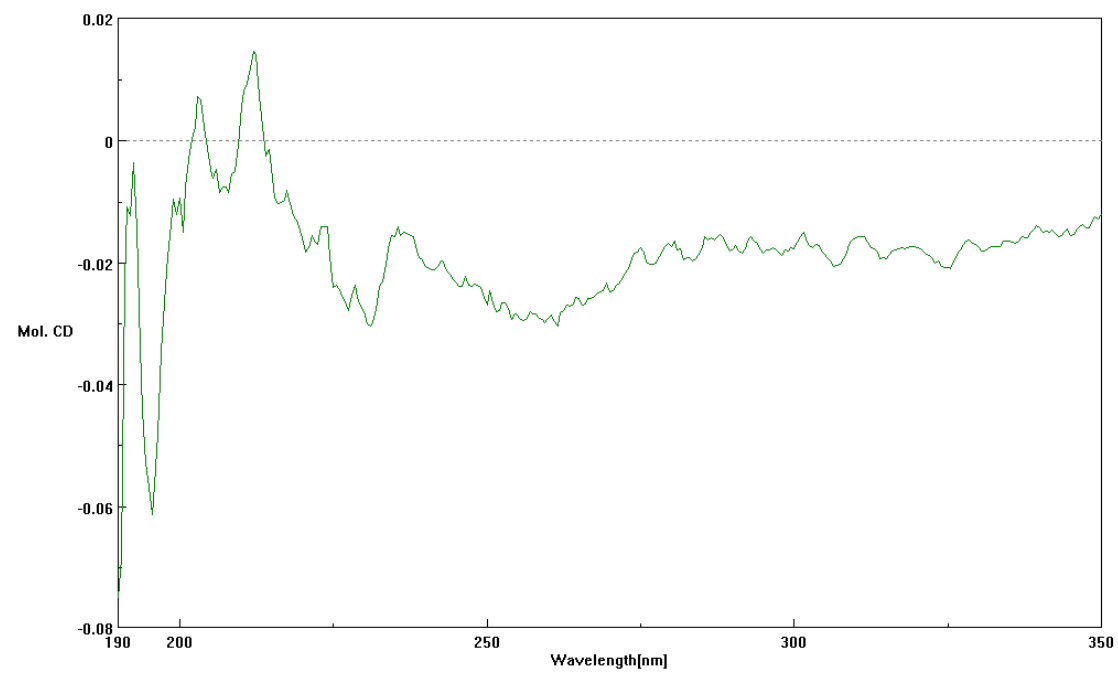

**S94.** Experimental ECD spectrum of **2** in MeCN

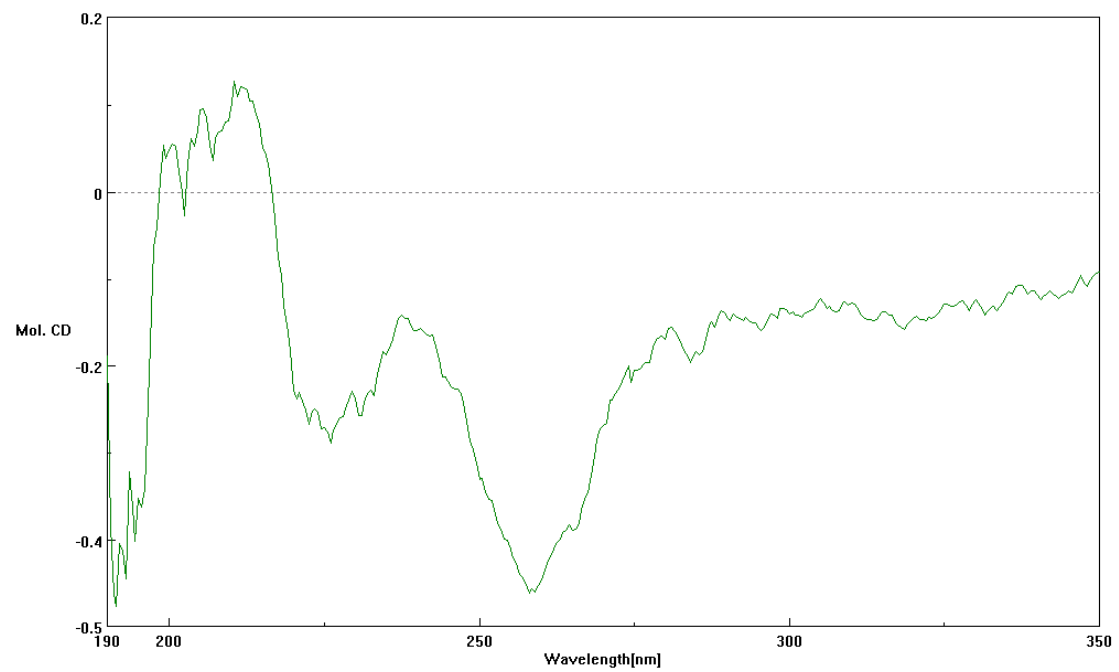

S95. Experimental ECD spectrum of **5** in MeCN



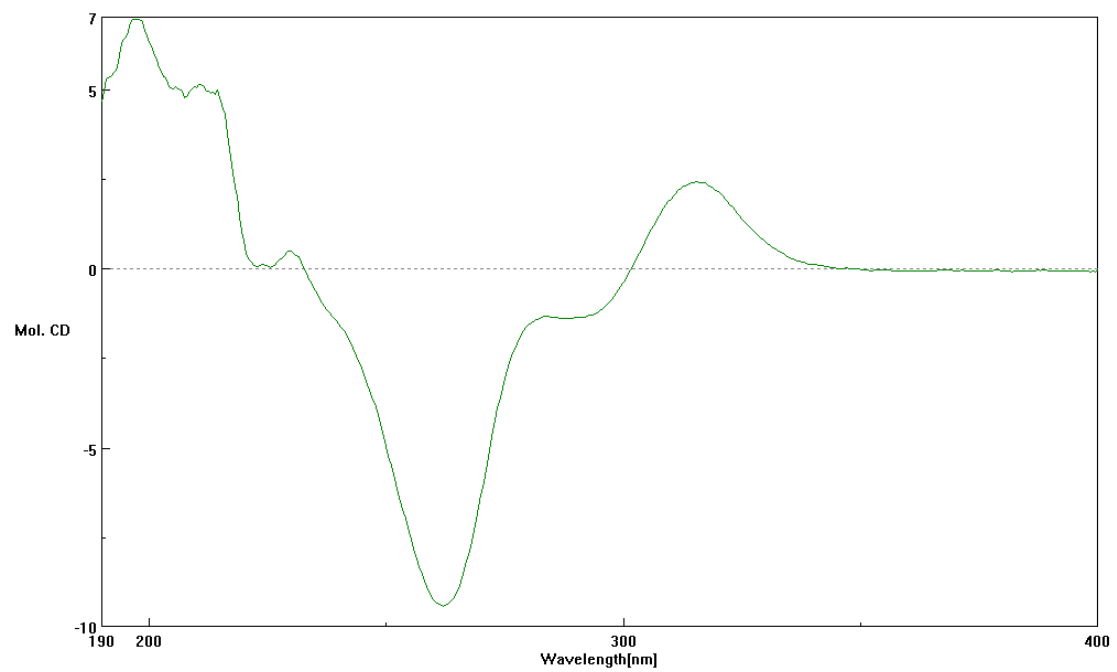

**S96.** Experimental ECD spectrum of **6** in MeCN

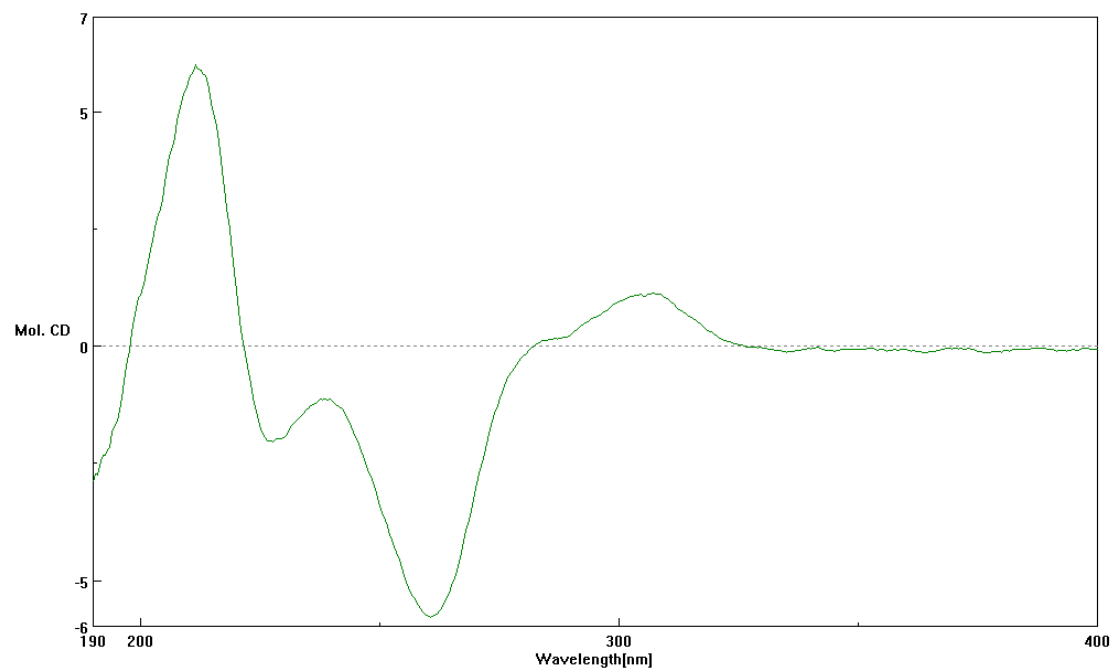

S97. Experimental ECD spectrum of 7 in MeCN

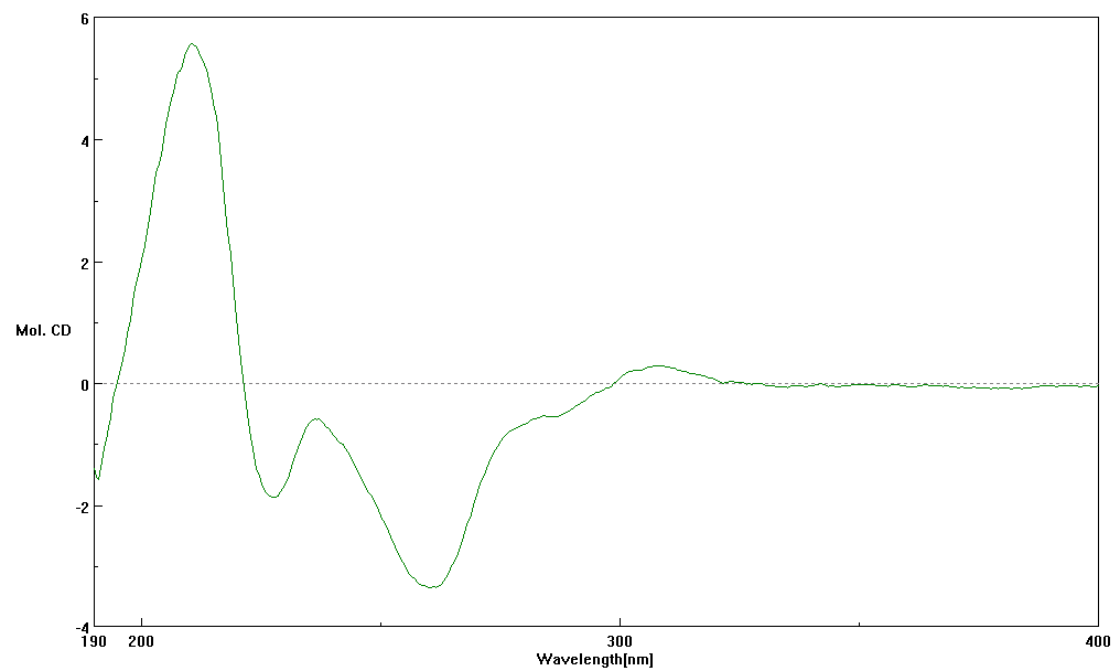

S98. Experimental ECD spectrum of **8** in MeCN

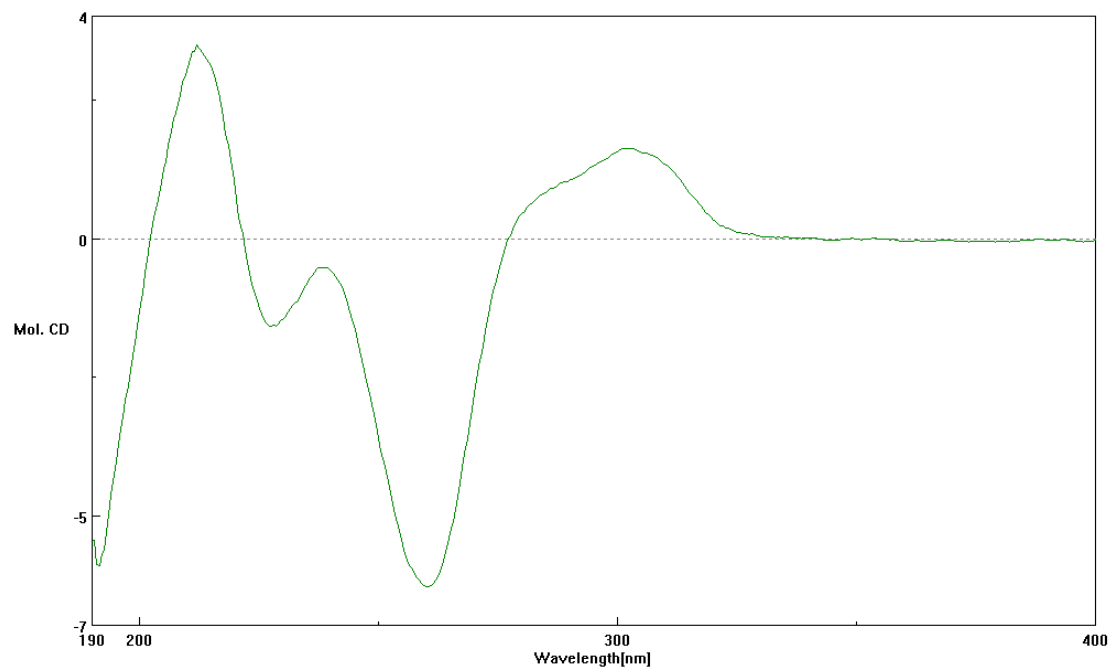

S99. Experimental ECD spectrum of **9** in MeCN

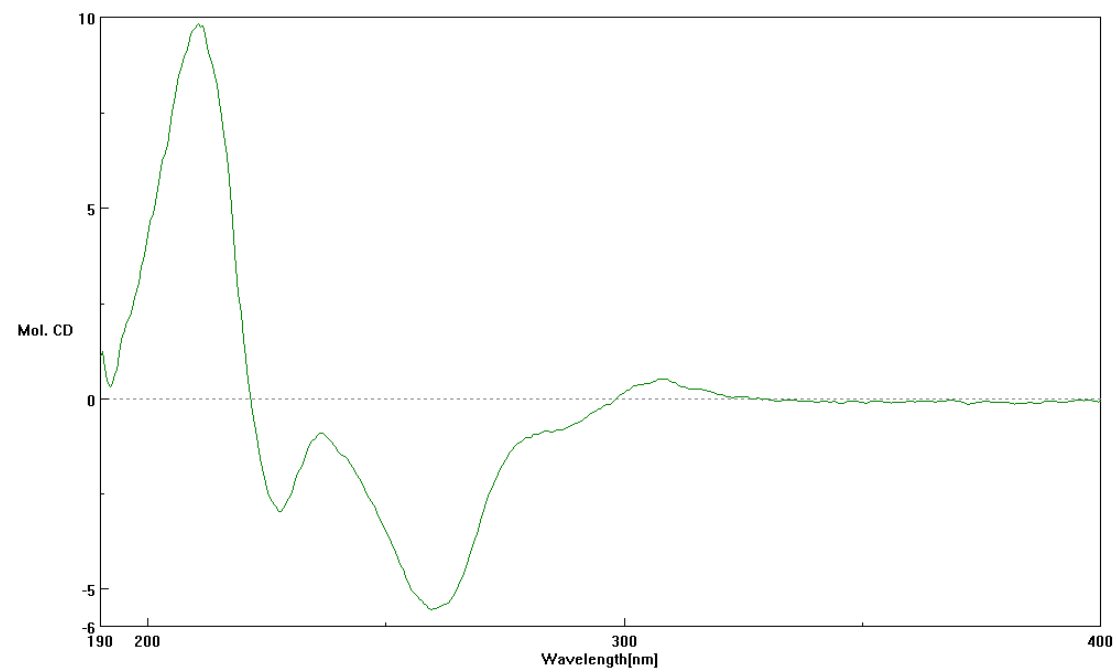

**S100.** Experimental ECD spectrum of **10** in MeCN

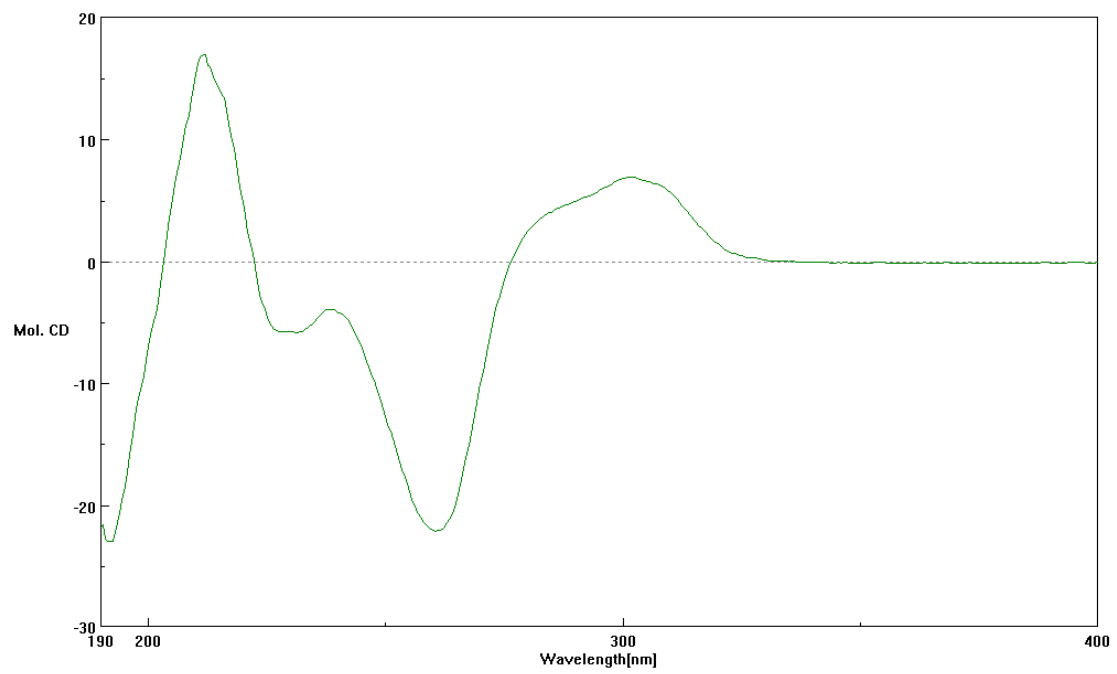

**S101.** Experimental ECD spectrum of **11** in MeCN

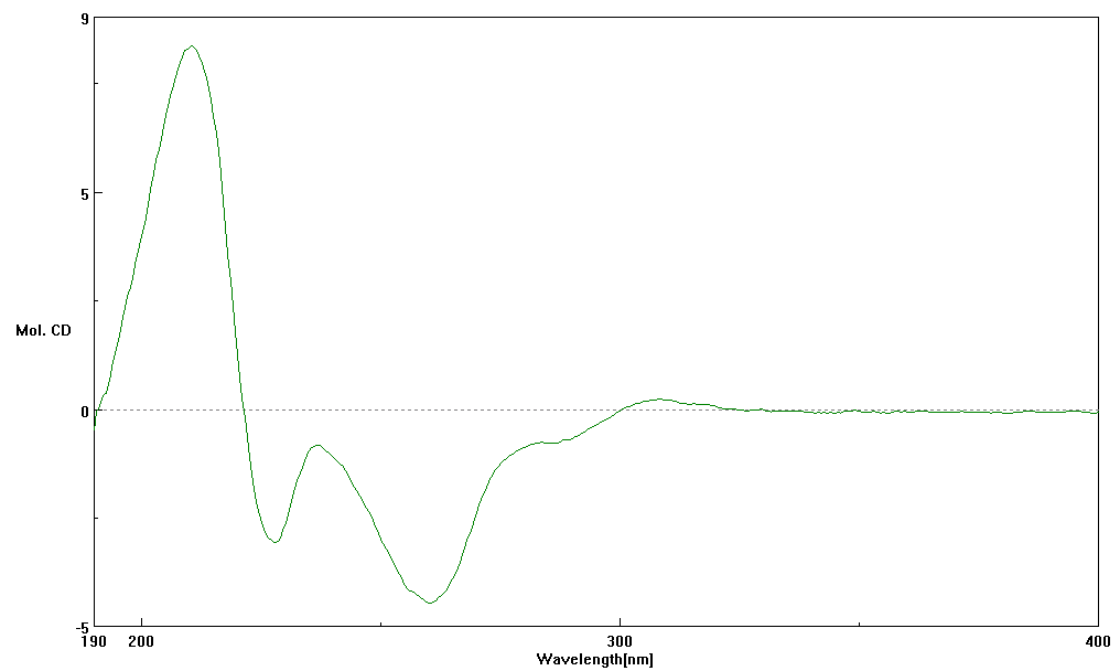

**S102.** Experimental ECD spectrum of **12** in MeCN

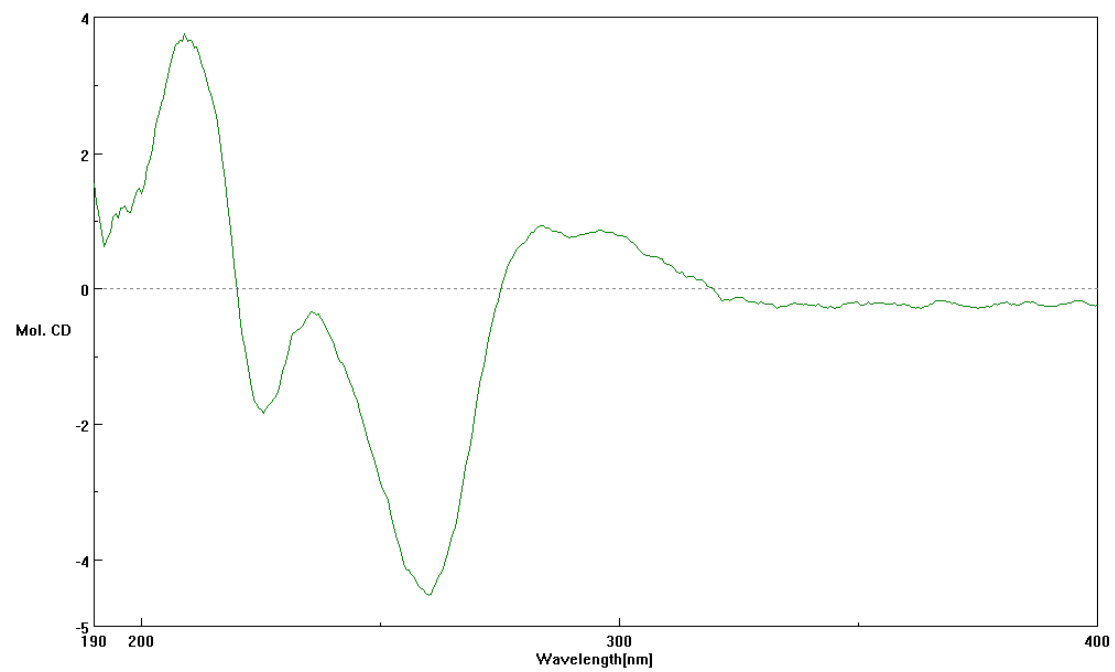

**S103.** Experimental ECD spectrum of **13** in MeCN



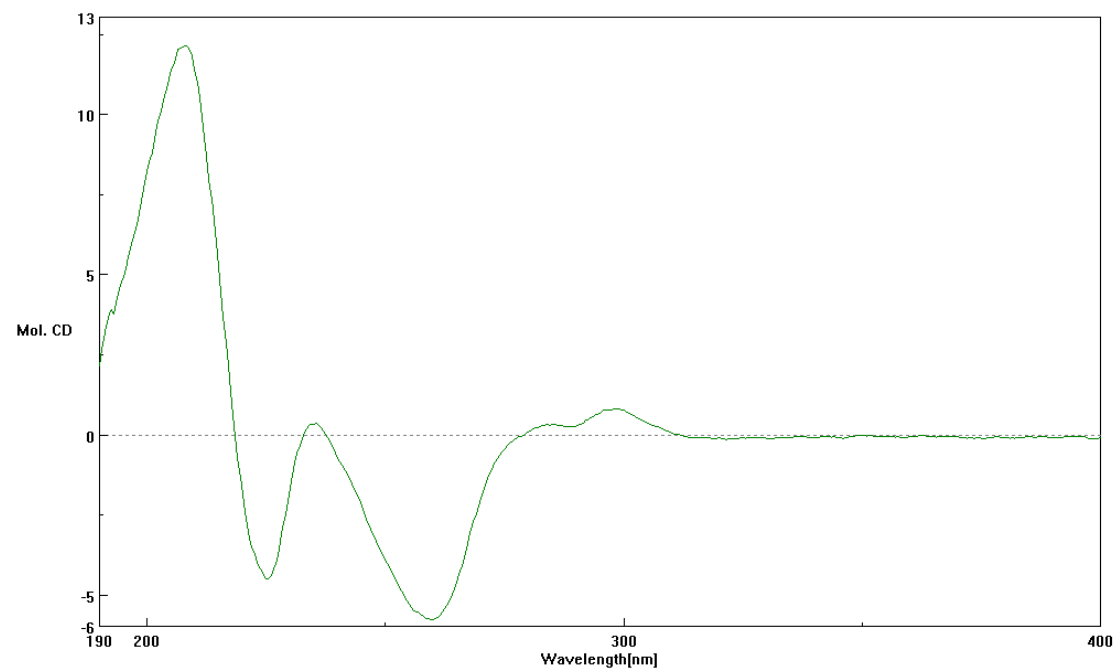

**S104.** Experimental ECD spectrum of **14** in MeCN

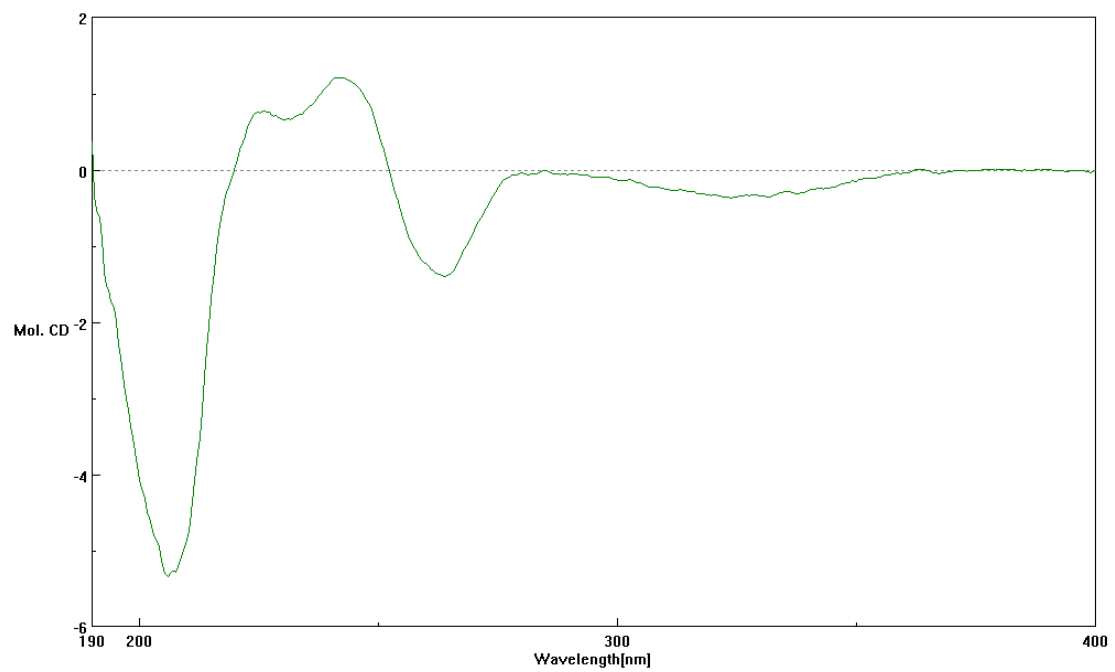

**S105.** Experimental ECD spectrum of **15** in MeCN

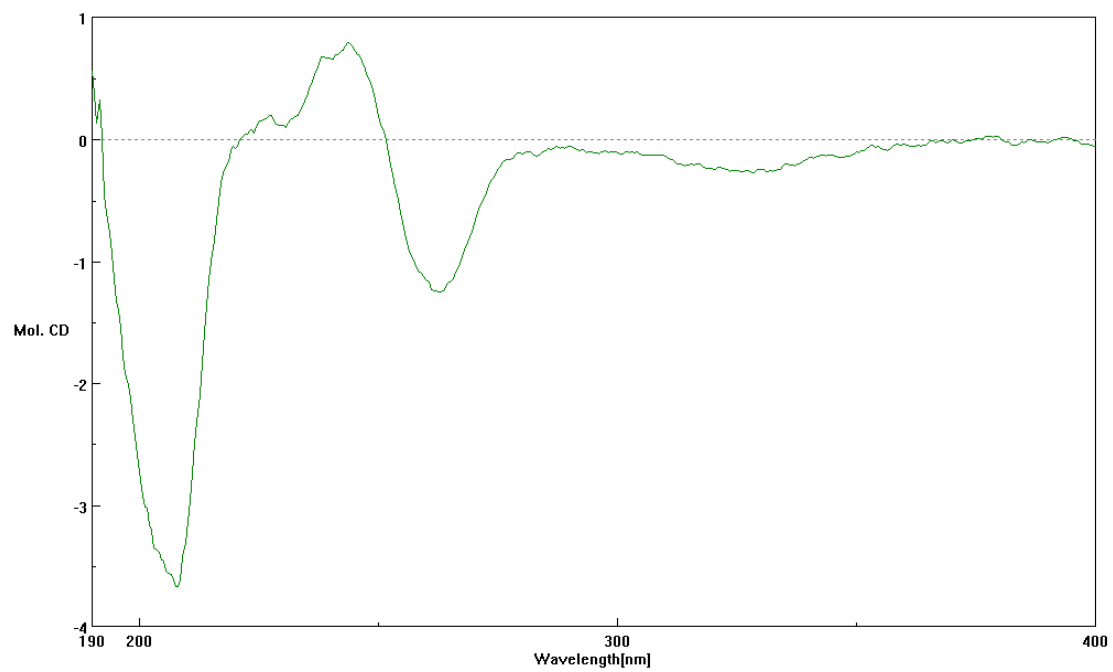

**S106.** Experimental ECD spectrum of **16** in MeCN
